# Supplementary material
Source: PubMed Central journal article supplement (PMC9957961)
Supplement: NIHMS1866788-supplement-1.pdf [file NIHMS1866788-supplement-1.pdf]

## Supplementary Material

### The Sleep and Wake Electroencephalogram over the Lifespan

Haoqi Sun<sup>1,2</sup>, Elissa Ye<sup>1</sup>, Luis Paixao<sup>1,3</sup>, Wolfgang Ganglberger<sup>1</sup>, Catherine J. Chu<sup>1</sup>, Can Zhang<sup>1</sup>, Jonathan Rosand<sup>1,2</sup>, Emmanuel Mignot<sup>4</sup>, Sydney S. Cash<sup>1</sup>, David Gozal<sup>5</sup>, Robert J. Thomas<sup>6\*</sup>, M. Brandon Westover<sup>1,2\*</sup>

<sup>1</sup>Department of Neurology, Massachusetts General Hospital, Boston, MA, USA

<sup>2</sup>Henry and Allison McCance Center for Brain Health at Mass General, Boston, MA, USA

<sup>3</sup>Washington University School of Medicine, St. Louis, MO, USA

<sup>4</sup>Center for Sleep Sciences and Medicine, Stanford University, Stanford, CA 94304, USA

<sup>5</sup>Department of Child Health, University of Missouri, Columbia, MO, USA

<sup>6</sup>Department of Medicine, Division of Pulmonary, Critical Care & Sleep, Beth Israel Deaconess Medical Center, Boston, MA, USA

\* Co-senior authors.

## Supplementary Figure

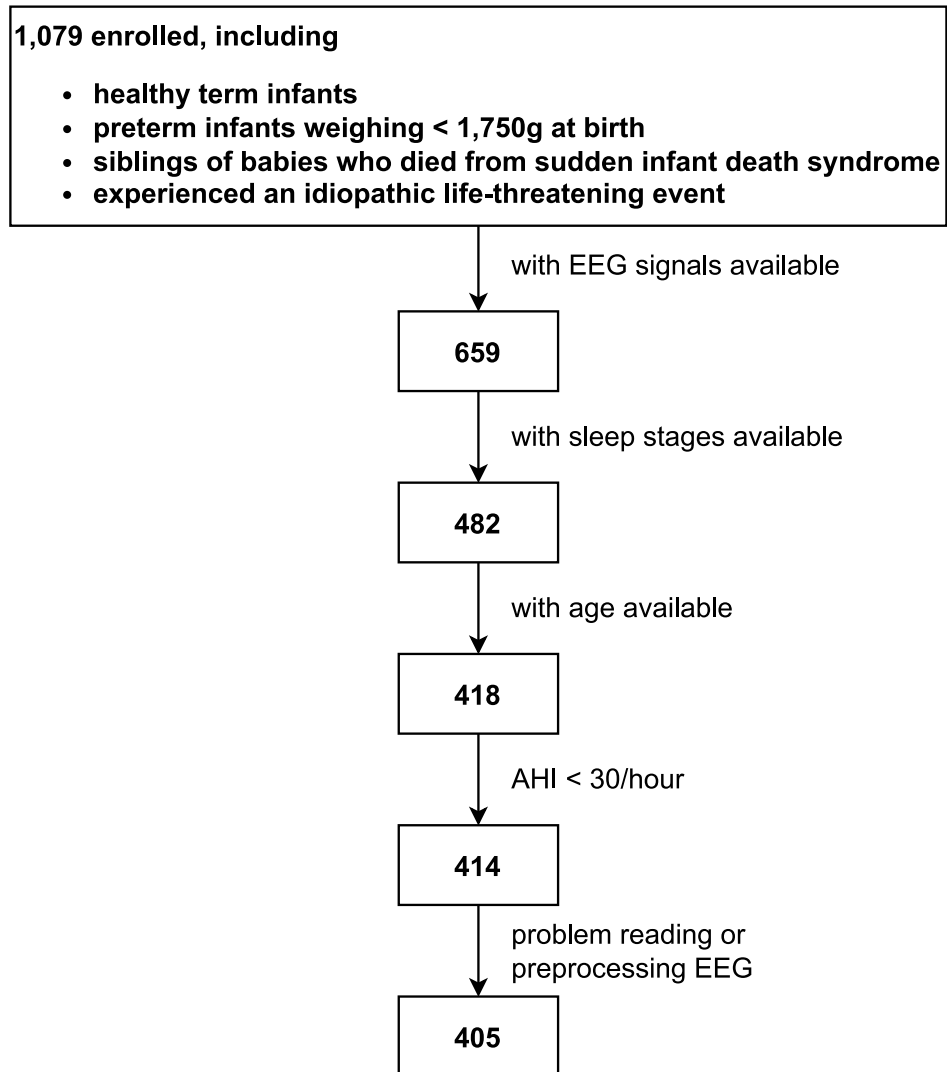

Figure S1. The flowchart for generating the CHIME dataset.

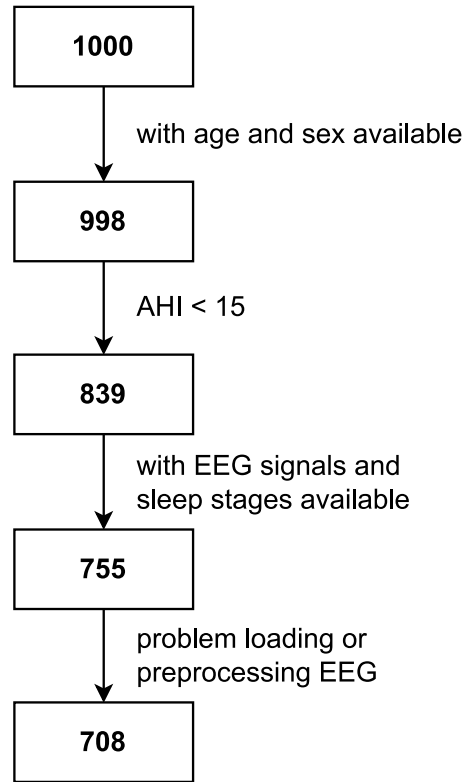

Figure S2. The flowchart for generating the Pediatric dataset.

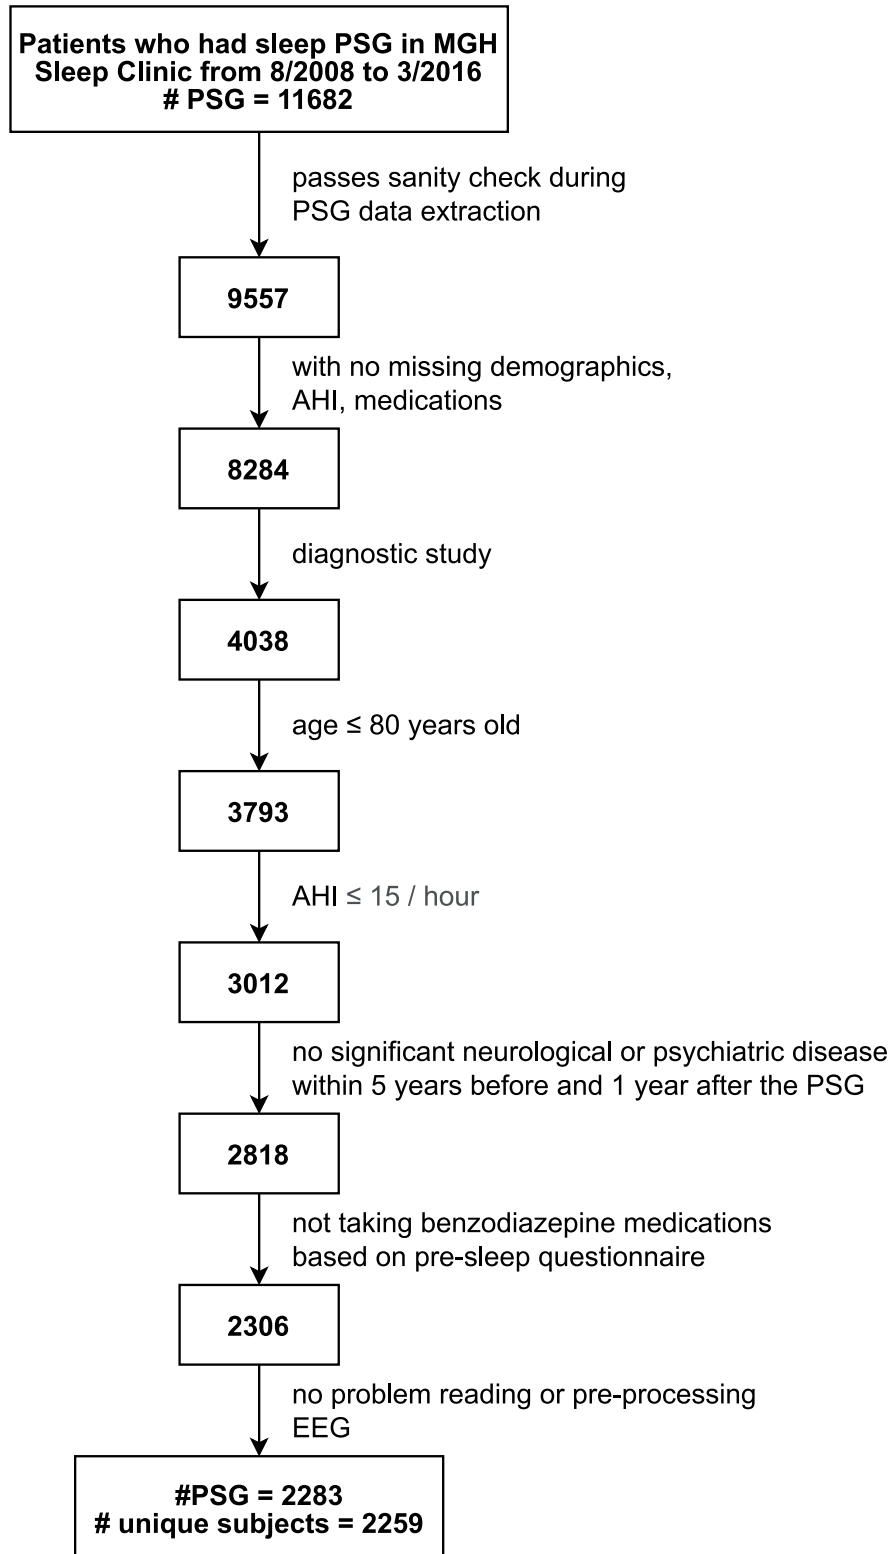

Figure S3. The flowchart for generating the MGH dataset.

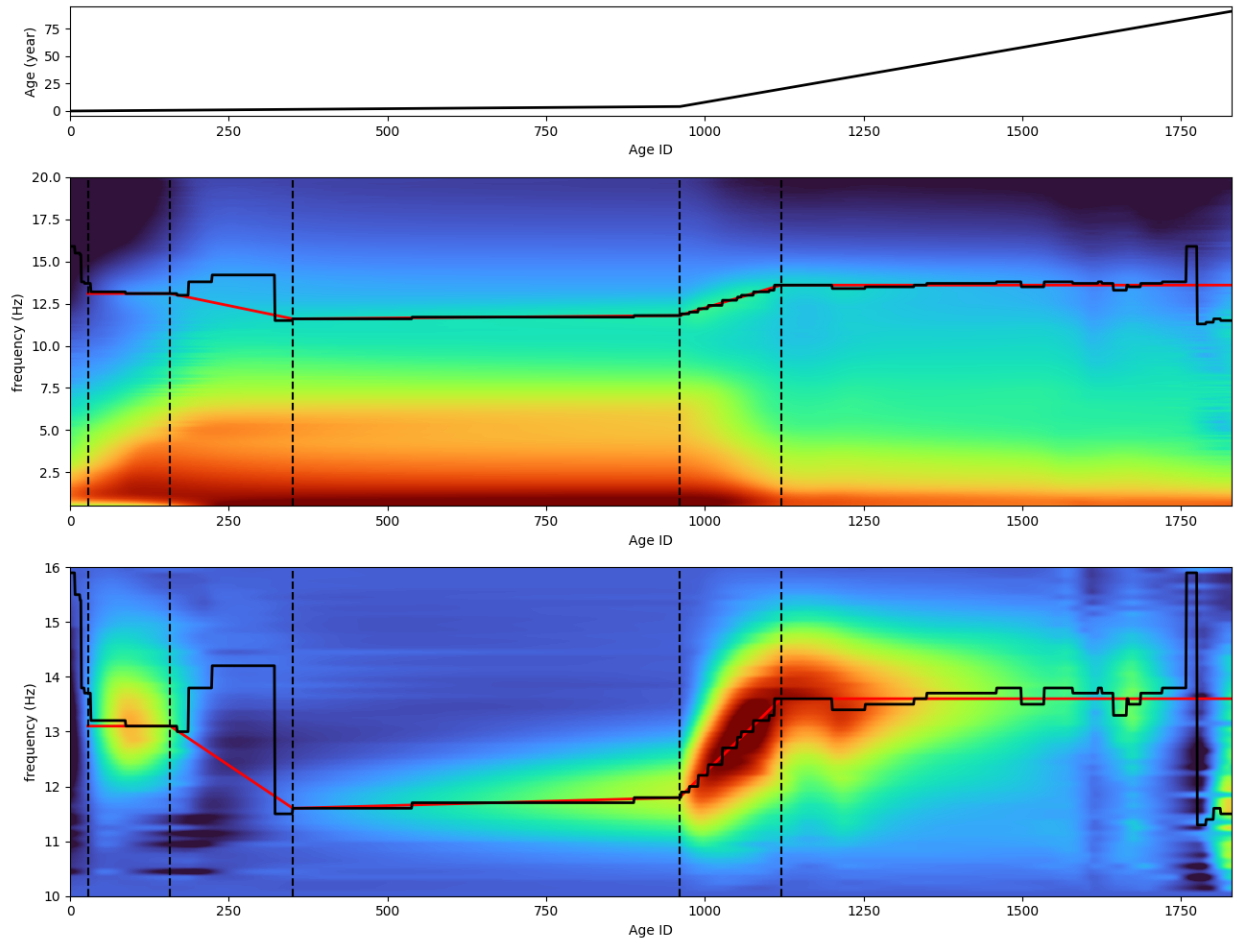

Figure S4. The plot used to derive the spindle detection center frequency for different ages using Luna detector. (Top) The age at each age index. We did not arrange ages in a linear way, since the increment is 1 month before 4 years old and 1 year after 5 years old. (Middle) The age-related spectrogram for male, central channel. The vertical black dashed lines indicate change points for the center frequency. The solid black line indicates the peak sigma band frequency at each age. The solid red line indicates the determined center frequency for spindle detection. Note that the discrepancy between black and red lines around age index 250 and 1750 are likely due to insufficient or noise in the spectra. (Bottom) the zoomed in frequency range from 10 to 16 Hz, after subtracting the 1/f pattern, to enhance the peak at the sigma band, where the peak frequency is determined using such 1/f-subtracted spectra here. Note that Luna detects spindles  $\pm 2$ Hz around the center frequency. Therefore, the center frequency (red line) is ok to be not accurate, since it only specifies a rough range to look for spindles.

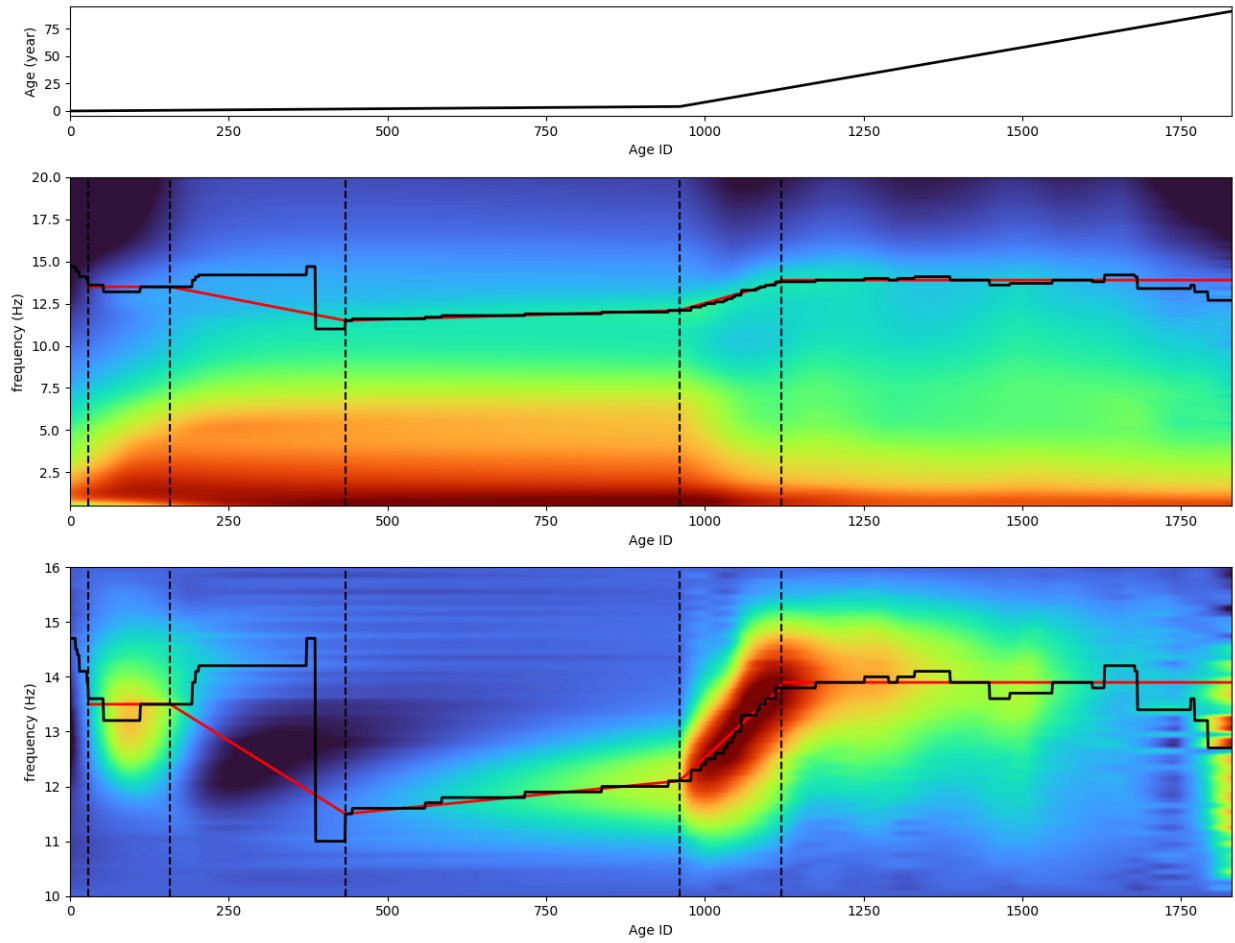

Figure S5. Similar to Figure S4, but for females and central channel.

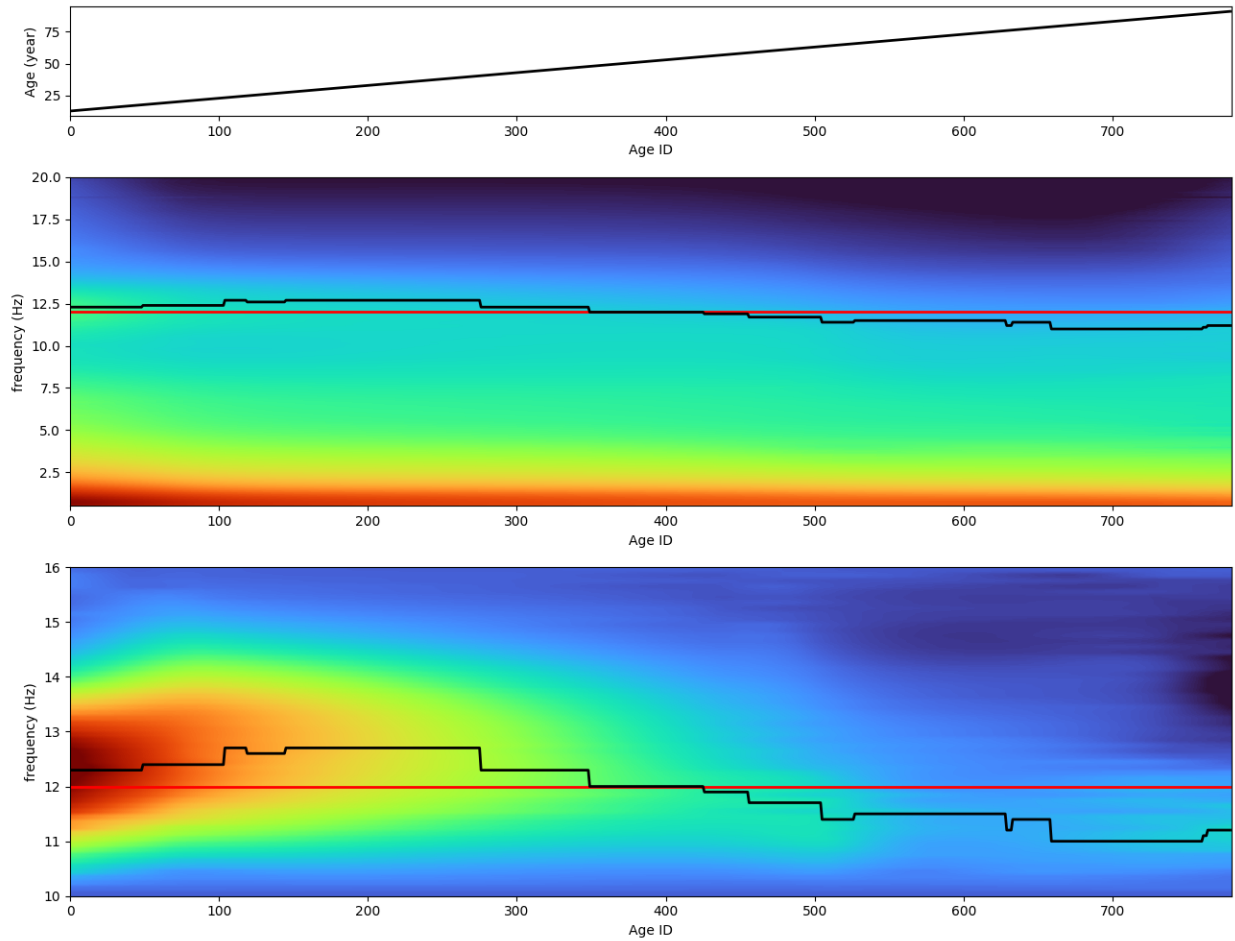

Figure S6. Similar to Figure S4, but for males and frontal channel. Here we set the center frequency to be constant since (1) we only have frontal channel data in age older than 13 years old (MGH dataset), which does not have fast changes compared to the neonatal period; and (2) similar to above figures, Luna detects spindles  $\pm 2$ Hz around the center frequency. Therefore, the center frequency (red line) is ok to be not accurate, since it only specifies a rough range to look for spindles.

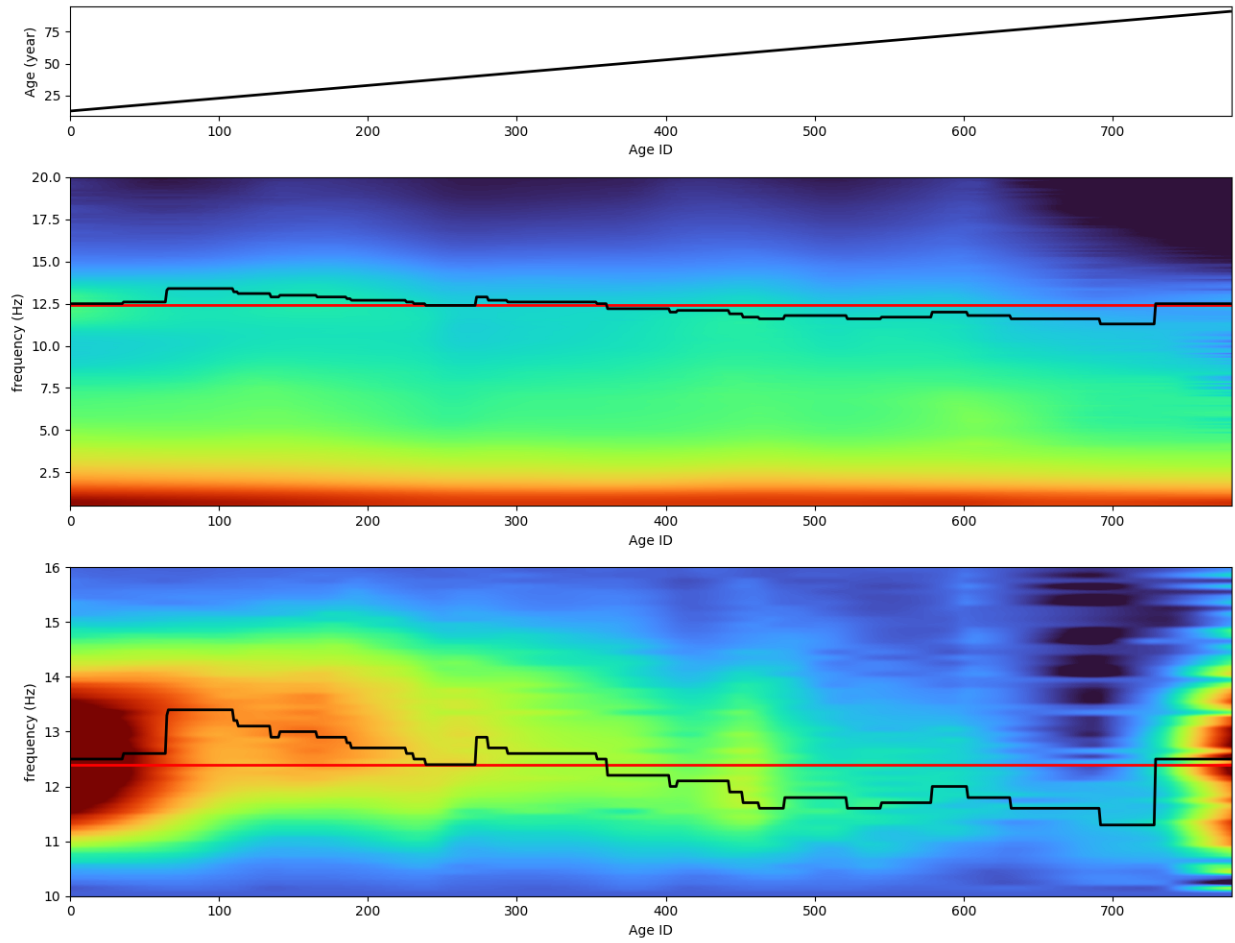

Figure S7. Similar to Figure S6, but for females and frontal channel.



**Supplementary Table**

Table S1. Summary of the datasets

|                                      | CHIME<br>(neonatal) | Pediatric<br>(pediatric) | MGH<br>(pediatric and adult) |
|--------------------------------------|---------------------|--------------------------|------------------------------|
| # Recording                          | 405                 | 708                      | 2283                         |
| # Participants                       | 405                 | 708                      | 2259                         |
| Age, year (mean, min, max)           | 2.3m (11d – 8m)     | 6.1y (1 – 13y)           | 46.5y (13 – 80y)             |
| Sex (% male)                         | --                  | 61.0                     | 48.4                         |
| BMI, kg/m <sup>2</sup> (mean, stdev) | --                  | 20.0 (6.1)               | 29.7 (7.8)                   |
| AHI, per hour (mean, stdev)          | 1.4 (3.2)           | 3.8 (3.5)                | 4.5 (4.1)                    |
| Normal (0 - 5)                       | 377 (93.1%)         | 509 (71.9%)              | 1434 (62.8%)                 |
| Mild (5 - 15)                        | 22 (5.4%)           | 199 (28.1%)              | 849 (37.2%)                  |
| Medium (15 - 30)                     | 6 (1.5%)            | 0                        | 0                            |
| <b>Sleep stage (% Time in Bed)</b>   |                     |                          |                              |
| W                                    | 30.4                | 17.1                     | 14.7                         |
| NREM (Quiet for <1y)                 | 32.8                | 66.6                     | 71.8                         |
| N1                                   | --                  | 3.7                      | 11.6                         |
| N2                                   | --                  | 40.7                     | 45.8                         |
| N3                                   | --                  | 22.3                     | 14.4                         |
| REM (Active for <1y)                 | 31.0                | 16.2                     | 13.5                         |
| Indeterminate                        | 5.8                 | --                       | --                           |

Table S2. Participants with any one or more of the following are considered to have significant neurological or psychiatric disease.

| <b>Category</b>                                           | <b>Disease</b>                             |
|-----------------------------------------------------------|--------------------------------------------|
| circulatory system                                        | stroke or hemorrhagic                      |
|                                                           | arterial ischemic stroke                   |
|                                                           | embolic stroke                             |
|                                                           | history of ischemic left ica stroke        |
|                                                           | cerebral embolism with cerebral infarction |
|                                                           | cerebral hemorrhage                        |
|                                                           | cerebral infarction                        |
|                                                           | cerebrovascular accident                   |
|                                                           | intracranial subarachnoid hemorrhage       |
|                                                           | subdural hematoma                          |
| hereditary & degenerative diseases-central nervous system | Alzheimer’s disease (with late onset)      |
|                                                           | hydrocephalus                              |

|                                                          |                                                                          |
|----------------------------------------------------------|--------------------------------------------------------------------------|
|                                                          | Parkinson's disease                                                      |
|                                                          | parkinsonism                                                             |
|                                                          | progressive supranuclear ophthalmoplegia                                 |
| intracranial injury excluding those with skull fractures | traumatic brain injury                                                   |
| mental disorders                                         | bipolar disorder                                                         |
|                                                          | cognitive impairment                                                     |
|                                                          | dementia                                                                 |
|                                                          | developmental delay                                                      |
|                                                          | impaired cognition                                                       |
|                                                          | major depressive disorder (recurrent, severe without psychotic features) |
|                                                          | mild cognitive disorder                                                  |
|                                                          | postconcussion syndrome                                                  |
|                                                          | psychotic disorder                                                       |
|                                                          | schizoaffective disorder                                                 |
|                                                          | schizoaffective disorder, bipolar type                                   |
|                                                          | schizophrenia                                                            |
| neoplasms                                                | intracranial glioma                                                      |
| other disorders-central nervous system                   | anoxic encephalopathy                                                    |
|                                                          | benign intracranial hypertension                                         |
|                                                          | cerebral palsy                                                           |
|                                                          | encephalopathy                                                           |
|                                                          | (localization-related) epilepsy                                          |
|                                                          | multiple sclerosis                                                       |
|                                                          | partial epilepsy with impairment of consciousness                        |
|                                                          | seizure disorder                                                         |
| history of seizures                                      |                                                                          |
| symptoms, signs, and ill-defined conditions              | delirium                                                                 |
|                                                          | memory impairment or loss                                                |

Table S3. Age norm lookup table for alpha (8-12Hz) relative power (normalized to total power from 0.5 to 20Hz) during W at occipital channel, showed in percentages (%). In each cell, the first row is from smoothed value, the second row is from unsmoothed value (actual data). 5 to 11 months and > 80 years are not applicable since they are not present in the dataset.

| Age            | Male 50% range | Male 75% range | Male 95% range | Female 50% range | Female 75% range | Female 95% range |
|----------------|----------------|----------------|----------------|------------------|------------------|------------------|
| 0.5 months     | 1.1--1.5       | 1.0--1.7       | 0.7--2.1       | 1.1--1.7         | 1.0--1.9         | 0.8--2.2         |
|                | 1.9--2.7       | 1.6--3.6       | 1.2--4.4       | 1.9--2.7         | 1.6--3.6         | 1.2--4.4         |
| 1 months       | 1.1--1.6       | 1.0--1.8       | 0.7--2.3       | 1.1--1.8         | 1.0--2.1         | 0.8--2.4         |
|                | 1.9--3.3       | 1.5--4.3       | 1.2--5.8       | 1.9--3.3         | 1.5--4.3         | 1.2--5.8         |
| 1.5 months     | 1.2--1.8       | 1.1--2.1       | 0.8--2.8       | 1.2--2.0         | 1.0--2.3         | 0.8--2.8         |
|                | 1.6--3.2       | 1.3--4.1       | 1.0--5.4       | 1.6--3.2         | 1.3--4.1         | 1.0--5.4         |
| 2 months       | 1.3--2.1       | 1.1--2.5       | 0.8--3.3       | 1.3--2.2         | 1.1--2.7         | 0.8--3.4         |
|                | 1.4--2.8       | 1.2--3.4       | 0.7--4.5       | 1.4--2.8         | 1.2--3.4         | 0.7--4.5         |
| 2.5 months     | 1.4--2.5       | 1.2--3.1       | 0.8--4.1       | 1.4--2.5         | 1.2--3.1         | 0.8--4.1         |
|                | 1.4--3.0       | 1.1--3.6       | 0.7--4.9       | 1.4--3.0         | 1.1--3.6         | 0.7--4.9         |
| 3 months       | 1.5--2.9       | 1.3--3.7       | 0.9--5.0       | 1.5--2.9         | 1.3--3.7         | 0.9--5.0         |
|                | 1.5--3.4       | 1.2--4.0       | 0.8--4.9       | 1.5--3.4         | 1.2--4.0         | 0.8--4.9         |
| 3.5 months     | 1.7--3.4       | 1.4--4.4       | 0.9--5.9       | 1.7--3.3         | 1.4--4.2         | 0.9--5.9         |
|                | 1.3--2.8       | 1.2--3.6       | 1.1--4.4       | 1.3--2.8         | 1.2--3.6         | 1.1--4.4         |
| 4 months       | 1.8--3.9       | 1.5--5.1       | 0.9--6.9       | 1.8--3.7         | 1.5--4.8         | 0.9--6.8         |
|                | 1.3--2.2       | 1.2--2.6       | 0.9--3.3       | 1.3--2.2         | 1.2--2.6         | 0.9--3.3         |
| 5 to 11 months | N/A            | N/A            | N/A            | N/A              | N/A              | N/A              |
| 1 years        | 3.7--9.8       | 2.6--13.5      | 1.5--18.8      | 3.7--8.5         | 2.7--12.0        | 1.2--18.4        |
|                | 1.5--2.9       | 1.3--4.2       | 1.0--8.1       | 1.5--2.6         | 1.2--3.3         | 0.9--6.7         |
| 2 years        | 4.8--13.0      | 3.3--17.6      | 1.7--25.4      | 4.9--11.8        | 3.3--16.4        | 1.4--25.7        |
|                | 3.5--8.0       | 2.3--8.7       | 1.3--16.1      | 3.3--8.8         | 1.4--10.1        | 1.1--13.0        |
| 3 years        | 4.9--13.3      | 3.4--17.7      | 1.7--26.7      | 5.2--13.0        | 3.4--17.6        | 1.4--27.0        |
|                | 4.8--12.3      | 3.9--13.9      | 2.2--17.9      | 4.9--9.8         | 3.8--11.3        | 3.3--17.5        |
| 4 years        | 5.7--15.5      | 4.0--20.5      | 2.1--31.7      | 6.1--15.1        | 4.1--20.1        | 1.9--30.0        |
|                | 5.4--13.9      | 5.1--18.9      | 4.0--23.5      | 6.6--13.2        | 5.8--14.7        | 2.4--17.9        |
| 5 years        | 6.0--16.2      | 4.2--21.6      | 2.2--33.4      | 6.4--15.8        | 4.4--21.0        | 2.1--31.4        |
|                | 7.0--14.4      | 3.9--22.6      | 1.7--33.3      | 6.2--13.9        | 5.3--17.3        | 3.2--24.8        |
| 6 years        | 6.4--17.1      | 4.5--22.8      | 2.3--35.2      | 6.9--16.6        | 4.8--22.1        | 2.3--32.9        |
|                | 5.6--16.5      | 5.1--18.0      | 2.8--23.5      | 7.0--15.4        | 4.5--18.3        | 2.9--25.7        |
| 7 years        | 6.8--18.2      | 4.9--24.1      | 2.5--37.0      | 7.4--17.5        | 5.2--23.4        | 2.5--35.0        |
|                | 8.2--16.4      | 6.0--20.1      | 5.1--31.6      | 8.3--23.6        | 7.4--26.3        | 4.5--37.1        |
| 8 years        | 7.4--19.5      | 5.3--25.7      | 2.6--39.5      | 7.9--18.8        | 5.6--24.9        | 2.8--37.4        |
|                | 8.1--18.8      | 5.7--24.6      | 3.5--34.3      | 8.4--21.0        | 7.7--23.3        | 3.6--28.7        |
| 9 years        | 8.0--20.9      | 5.7--27.6      | 2.8--42.1      | 8.4--20.3        | 6.2--27.0        | 3.1--39.9        |
|                | 12.5--21.3     | 8.6--26.8      | 3.5--40.2      | 12.2--20.9       | 7.9--22.4        | 6.4--32.8        |
| 10 years       | 8.5--22.5      | 6.2--29.8      | 2.9--44.8      | 9.3--22.1        | 6.8--29.3        | 3.5--42.9        |
|                | 14.7--33.6     | 11.1--35.5     | 6.3--49.4      | 7.4--13.6        | 5.2--20.8        | 3.5--22.0        |
| 11 years       | 9.2--24.2      | 6.6--32.1      | 3.1--47.3      | 10.1--24.1       | 7.4--31.7        | 3.8--46.0        |
|                | 10.5--23.0     | 8.7--29.3      | 3.3--44.6      | 13.3--17.8       | 11.1--25.4       | 7.6--33.9        |
| 12 years       | 10.0--26.2     | 7.2--34.3      | 3.3--49.9      | 11.0--26.3       | 8.0--34.2        | 4.2--49.2        |
|                | 8.4--26.9      | 7.1--30.7      | 4.3--35.8      | 11.9--28.8       | 9.4--38.0        | 6.2--43.0        |
| 13 years       | 11.1--28.5     | 8.0--36.6      | 3.6--52.3      | 12.0--28.5       | 8.6--36.7        | 4.4--52.2        |
|                | 11.6--25.3     | 8.9--31.4      | 5.6--39.4      | 14.7--25.7       | 11.5--31.7       | 9.4--40.4        |

|          |                          |                          |                         |                          |                          |                         |
|----------|--------------------------|--------------------------|-------------------------|--------------------------|--------------------------|-------------------------|
| 14 years | 12.2--30.7<br>18.1--26.9 | 8.8--38.7<br>13.8--42.5  | 3.9--54.7<br>8.2--60.3  | 12.8--30.7<br>12.4--16.6 | 9.2--39.2<br>11.4--17.6  | 4.5--54.7<br>10.5--18.5 |
| 15 years | 13.2--32.7<br>22.7--45.7 | 9.5--40.6<br>13.2--50.3  | 4.1--57.0<br>11.3--57.6 | 13.7--32.8<br>16.9--38.2 | 9.7--41.4<br>13.8--54.4  | 4.6--56.9<br>9.1--65.9  |
| 16 years | 14.1--34.6<br>27.4--38.4 | 10.2--42.4<br>21.0--46.5 | 4.3--59.1<br>15.2--55.6 | 14.5--34.7<br>39.7--41.5 | 10.3--43.6<br>39.3--41.9 | 4.7--59.4<br>38.9--42.2 |
| 17 years | 15.0--36.3<br>11.8--25.2 | 10.9--43.8<br>8.2--34.2  | 4.5--60.6<br>6.0--44.5  | 15.3--36.4<br>15.7--37.1 | 10.8--45.7<br>10.4--46.9 | 4.8--61.1<br>9.8--55.3  |
| 18 years | 15.9--37.8<br>14.7--40.9 | 11.4--45.0<br>14.1--48.1 | 4.7--62.0<br>4.9--61.0  | 15.9--37.9<br>28.2--47.5 | 11.1--47.5<br>24.2--51.7 | 4.8--62.5<br>21.6--63.1 |
| 19 years | 16.7--39.2<br>27.4--50.3 | 12.0--46.1<br>24.7--53.6 | 5.0--63.4<br>22.9--61.7 | 16.5--39.4<br>18.8--56.2 | 11.5--48.9<br>14.6--58.2 | 4.9--63.2<br>5.9--58.9  |
| 20 years | 17.4--40.4<br>12.4--42.6 | 12.4--47.0<br>5.3--44.2  | 5.4--64.3<br>4.5--44.4  | 17.0--40.6<br>14.1--34.9 | 11.9--50.2<br>10.4--47.7 | 4.8--63.6<br>6.3--61.7  |
| 21 years | 18.1--41.3<br>21.3--42.6 | 12.8--47.6<br>16.4--47.2 | 5.8--64.8<br>14.8--52.9 | 17.4--41.5<br>16.7--41.4 | 12.1--51.0<br>12.3--43.0 | 4.8--63.7<br>6.9--63.2  |
| 22 years | 18.8--42.2<br>26.0--45.7 | 13.2--48.0<br>24.9--47.8 | 6.3--65.2<br>21.2--68.2 | 17.7--42.2<br>15.8--36.3 | 12.4--51.7<br>11.1--43.8 | 4.7--63.5<br>9.7--48.8  |
| 23 years | 19.4--42.9<br>17.7--36.2 | 13.5--48.3<br>8.3--43.1  | 6.6--65.5<br>6.2--61.0  | 17.8--42.5<br>32.0--44.4 | 12.5--52.2<br>25.0--49.2 | 4.6--63.0<br>7.4--54.2  |
| 24 years | 19.8--43.1<br>23.1--42.4 | 13.7--48.4<br>14.1--43.4 | 7.0--65.6<br>9.1--59.8  | 17.9--42.5<br>14.6--47.1 | 12.7--52.4<br>12.3--56.3 | 4.6--62.5<br>10.3--56.7 |
| 25 years | 20.0--42.9<br>19.9--46.2 | 13.8--48.6<br>14.0--49.1 | 7.3--65.6<br>7.4--57.0  | 17.9--42.3<br>21.7--46.3 | 12.8--52.2<br>18.4--50.1 | 4.6--62.0<br>15.5--54.2 |
| 26 years | 20.0--42.7<br>16.7--38.1 | 13.8--48.9<br>13.9--44.3 | 7.7--65.9<br>10.3--47.0 | 17.9--42.1<br>18.6--32.9 | 12.8--51.9<br>15.5--57.9 | 4.8--61.5<br>7.3--64.3  |
| 27 years | 20.1--42.5<br>21.8--41.3 | 13.8--49.3<br>13.5--47.3 | 8.2--66.1<br>9.0--54.3  | 17.9--41.8<br>16.4--40.0 | 12.8--51.9<br>10.8--50.2 | 5.0--61.3<br>5.2--59.3  |
| 28 years | 20.2--42.4<br>16.1--40.7 | 13.8--49.9<br>12.7--43.4 | 8.6--66.4<br>8.3--63.1  | 17.9--41.5<br>17.0--41.6 | 12.7--51.8<br>12.6--53.1 | 5.2--60.8<br>6.7--59.5  |
| 29 years | 20.3--42.2<br>23.0--47.1 | 13.8--50.5<br>17.6--51.5 | 9.0--66.4<br>13.3--62.8 | 17.8--41.2<br>22.1--46.7 | 12.6--51.6<br>17.3--47.5 | 5.3--60.5<br>10.9--55.8 |
| 30 years | 20.2--42.1<br>18.6--35.1 | 13.8--51.1<br>14.8--48.3 | 9.3--66.4<br>11.3--62.2 | 17.8--40.9<br>14.4--53.3 | 12.6--51.2<br>12.7--55.5 | 5.5--60.5<br>8.7--59.7  |
| 31 years | 20.2--42.2<br>17.9--39.1 | 13.7--51.7<br>12.8--40.7 | 9.5--66.4<br>8.8--49.7  | 17.9--40.5<br>16.9--39.2 | 12.6--51.2<br>11.4--42.9 | 5.7--60.5<br>4.2--53.3  |
| 32 years | 20.1--42.1<br>29.0--50.0 | 13.6--52.3<br>24.0--56.6 | 9.6--66.4<br>17.6--64.7 | 17.9--40.1<br>23.9--40.7 | 12.5--50.8<br>15.3--54.3 | 5.9--60.4<br>10.1--62.3 |
| 33 years | 20.0--42.2<br>22.7--42.5 | 13.6--52.9<br>12.5--57.4 | 9.6--66.6<br>9.0--62.0  | 18.0--39.6<br>19.8--33.2 | 12.4--50.6<br>9.7--38.9  | 6.1--60.5<br>7.2--43.3  |
| 34 years | 19.9--42.2<br>16.6--35.4 | 13.6--53.3<br>15.1--46.7 | 9.5--66.7<br>12.2--67.2 | 17.9--39.4<br>16.7--33.8 | 12.3--50.2<br>10.5--45.6 | 6.3--60.6<br>8.5--55.7  |
| 35 years | 19.8--42.2<br>28.1--40.8 | 13.5--53.5<br>20.2--57.6 | 9.4--66.7<br>15.8--67.0 | 17.9--39.4<br>19.9--33.1 | 12.2--50.0<br>17.9--36.1 | 6.5--60.8<br>10.5--47.1 |
| 36 years | 19.7--42.3<br>17.8--38.1 | 13.5--53.7<br>13.5--55.4 | 9.2--66.7<br>10.8--67.6 | 17.9--39.4<br>25.1--46.1 | 12.1--49.9<br>14.8--51.7 | 6.6--61.0<br>10.3--60.8 |
| 37 years | 19.6--42.5<br>33.5--45.8 | 13.4--53.9<br>31.9--47.4 | 9.0--66.7<br>17.7--49.4 | 17.8--39.4<br>24.1--50.2 | 12.1--50.0<br>12.4--55.4 | 6.7--61.0<br>11.0--64.6 |
| 38 years | 19.5--42.7<br>15.7--51.8 | 13.4--53.8<br>10.2--59.8 | 8.8--66.4<br>7.9--68.0  | 17.7--39.4<br>12.3--22.2 | 12.1--50.2<br>9.4--28.8  | 6.8--61.2<br>5.9--49.5  |

|          |                          |                          |                         |                          |                          |                         |
|----------|--------------------------|--------------------------|-------------------------|--------------------------|--------------------------|-------------------------|
| 39 years | 19.5--42.7<br>14.5--43.4 | 13.3--53.7<br>13.5--52.5 | 8.6--66.0<br>11.8--59.6 | 17.6--39.3<br>22.9--38.8 | 12.1--50.1<br>16.7--44.9 | 6.8--61.2<br>4.2--62.4  |
| 40 years | 19.5--42.7<br>11.2--33.3 | 13.2--53.3<br>10.2--41.7 | 8.4--65.6<br>5.8--57.8  | 17.7--39.3<br>15.5--34.9 | 12.2--50.0<br>11.6--49.1 | 6.9--61.1<br>9.5--64.2  |
| 41 years | 19.5--42.7<br>18.8--45.8 | 13.2--53.0<br>13.6--54.1 | 8.2--65.4<br>10.2--65.7 | 17.7--39.3<br>16.6--37.6 | 12.2--49.9<br>14.3--44.5 | 7.1--61.0<br>8.9--48.0  |
| 42 years | 19.6--42.7<br>24.5--50.1 | 13.3--52.5<br>18.7--56.9 | 8.1--65.1<br>11.3--67.2 | 17.7--39.3<br>22.6--46.2 | 12.3--49.8<br>21.0--55.4 | 7.3--61.0<br>13.8--58.4 |
| 43 years | 19.8--42.5<br>23.6--41.5 | 13.4--51.9<br>16.0--49.9 | 8.0--64.6<br>6.6--61.6  | 17.7--39.4<br>16.0--37.4 | 12.3--49.8<br>12.6--42.9 | 7.4--60.8<br>7.9--57.5  |
| 44 years | 20.0--42.4<br>19.1--41.0 | 13.6--51.2<br>10.4--47.1 | 8.1--64.0<br>5.8--56.5  | 17.7--39.6<br>13.8--48.1 | 12.3--49.7<br>10.5--54.0 | 7.6--60.7<br>6.5--56.1  |
| 45 years | 20.3--42.3<br>18.5--39.5 | 13.7--50.6<br>11.9--44.4 | 8.2--63.4<br>3.9--56.3  | 17.6--39.6<br>17.8--44.9 | 12.4--49.6<br>12.6--49.9 | 7.7--60.5<br>7.4--60.3  |
| 46 years | 20.4--42.1<br>27.5--51.0 | 13.8--50.0<br>20.5--52.1 | 8.4--62.8<br>16.5--62.8 | 17.7--39.5<br>15.0--38.7 | 12.4--49.4<br>11.6--48.1 | 7.9--60.1<br>8.3--62.3  |
| 47 years | 20.5--41.9<br>22.3--42.3 | 14.0--49.5<br>14.9--54.7 | 8.6--62.3<br>10.9--64.7 | 17.7--39.2<br>15.4--31.4 | 12.5--49.1<br>11.6--42.7 | 8.1--59.6<br>8.3--55.8  |
| 48 years | 20.5--41.5<br>14.6--42.0 | 14.1--49.0<br>12.1--48.4 | 8.9--61.6<br>10.3--59.2 | 17.9--39.0<br>17.7--43.6 | 12.6--48.6<br>14.1--53.2 | 8.4--58.9<br>9.3--63.6  |
| 49 years | 20.5--41.3<br>19.7--37.2 | 14.2--48.5<br>13.5--42.3 | 9.0--60.9<br>12.0--55.7 | 18.1--38.9<br>23.5--37.2 | 12.8--48.3<br>16.8--44.5 | 8.6--58.5<br>12.0--56.3 |
| 50 years | 20.6--41.1<br>21.3--37.4 | 14.3--48.1<br>15.5--50.1 | 9.2--60.2<br>10.1--59.4 | 18.2--38.8<br>23.7--38.1 | 12.9--47.8<br>16.9--44.8 | 8.8--57.8<br>8.0--50.4  |
| 51 years | 20.7--41.0<br>21.5--40.4 | 14.4--47.7<br>14.5--45.8 | 9.3--59.6<br>7.9--64.2  | 18.3--38.8<br>17.5--28.5 | 13.0--47.3<br>11.9--38.4 | 9.0--57.4<br>9.7--48.8  |
| 52 years | 20.6--40.9<br>25.2--40.9 | 14.5--47.4<br>19.7--45.8 | 9.4--58.9<br>15.4--47.7 | 18.3--38.8<br>23.7--43.0 | 13.1--47.0<br>15.3--48.8 | 9.2--57.0<br>10.1--58.3 |
| 53 years | 20.5--40.8<br>23.1--40.1 | 14.6--47.0<br>18.2--41.9 | 9.6--58.4<br>13.0--46.0 | 18.3--38.7<br>21.2--43.0 | 13.3--46.6<br>16.0--48.8 | 9.3--56.7<br>11.5--52.8 |
| 54 years | 20.4--40.7<br>23.7--46.3 | 14.7--46.9<br>17.7--48.0 | 9.7--57.9<br>14.7--52.8 | 18.4--38.6<br>15.9--35.4 | 13.6--46.3<br>11.9--44.6 | 9.5--56.3<br>9.3--50.5  |
| 55 years | 20.4--40.6<br>23.9--42.2 | 14.7--46.9<br>18.6--44.8 | 9.8--57.7<br>9.1--51.5  | 18.5--38.4<br>15.6--41.2 | 13.8--45.9<br>12.0--49.3 | 9.5--56.0<br>9.9--57.1  |
| 56 years | 20.3--40.7<br>18.4--35.9 | 14.8--47.0<br>15.8--44.2 | 9.7--57.7<br>6.8--53.9  | 18.5--38.4<br>20.1--34.5 | 14.1--45.5<br>13.5--40.3 | 9.7--55.7<br>10.0--57.3 |
| 57 years | 20.2--40.7<br>13.9--29.1 | 14.9--47.2<br>12.5--35.6 | 9.7--57.6<br>9.7--45.2  | 18.6--38.4<br>18.4--40.8 | 14.4--45.3<br>14.2--48.6 | 9.8--55.5<br>10.2--53.1 |
| 58 years | 20.2--40.8<br>19.0--40.3 | 15.0--47.4<br>13.8--44.0 | 9.6--57.6<br>10.2--56.0 | 18.6--38.6<br>23.1--37.4 | 14.6--45.3<br>18.0--43.4 | 9.8--55.8<br>13.2--51.8 |
| 59 years | 20.2--40.8<br>26.2--49.5 | 15.1--47.5<br>18.6--51.7 | 9.5--57.6<br>11.2--59.3 | 18.6--38.7<br>17.3--33.2 | 14.8--45.3<br>15.4--40.3 | 9.8--56.2<br>12.3--50.8 |
| 60 years | 20.2--40.8<br>26.8--38.3 | 15.0--47.6<br>20.3--42.7 | 9.3--57.6<br>10.1--55.9 | 18.6--38.6<br>26.4--43.7 | 15.0--45.2<br>16.9--51.3 | 9.7--56.7<br>10.3--53.5 |
| 61 years | 20.1--40.6<br>30.0--41.5 | 14.9--47.5<br>20.9--46.2 | 9.2--57.6<br>13.4--54.8 | 18.6--38.5<br>18.3--29.4 | 15.1--45.2<br>16.3--39.0 | 9.5--57.3<br>14.8--47.1 |
| 62 years | 20.0--40.5<br>20.1--38.6 | 14.7--47.5<br>18.1--47.5 | 9.0--57.9<br>13.4--54.5 | 18.7--38.3<br>24.3--37.2 | 15.2--45.0<br>19.0--43.7 | 9.3--57.8<br>12.2--59.8 |
| 63 years | 19.7--40.4<br>21.4--37.3 | 14.4--47.6<br>18.1--39.0 | 8.8--58.3<br>15.8--42.8 | 18.7--37.8<br>21.7--39.7 | 15.3--44.9<br>19.0--47.8 | 9.1--58.3<br>12.1--55.5 |

|            |                          |                          |                         |                          |                          |                          |
|------------|--------------------------|--------------------------|-------------------------|--------------------------|--------------------------|--------------------------|
| 64 years   | 19.5--40.2<br>23.2--43.2 | 14.1--47.6<br>18.4--49.6 | 8.6--58.5<br>10.9--56.0 | 18.6--37.5<br>20.1--34.5 | 15.2--44.7<br>18.4--43.4 | 8.9--58.8<br>16.1--49.8  |
| 65 years   | 19.2--39.9<br>20.4--44.4 | 13.9--47.4<br>19.0--53.0 | 8.5--58.5<br>18.3--58.5 | 18.5--37.2<br>13.7--29.8 | 15.2--44.6<br>12.1--36.8 | 8.8--59.3<br>5.5--42.9   |
| 66 years   | 18.8--39.6<br>18.4--46.6 | 13.6--47.1<br>14.9--51.7 | 8.3--58.6<br>8.2--58.1  | 18.4--36.8<br>17.7--31.5 | 15.1--44.3<br>16.4--43.7 | 8.6--59.7<br>13.4--54.2  |
| 67 years   | 18.6--39.3<br>16.2--35.0 | 13.3--46.7<br>11.4--46.9 | 8.1--58.4<br>5.5--53.4  | 18.2--36.5<br>22.1--43.4 | 14.9--43.8<br>18.8--52.7 | 8.5--60.0<br>10.7--66.4  |
| 68 years   | 18.3--38.8<br>12.9--38.2 | 13.1--46.2<br>11.1--47.6 | 7.9--58.2<br>8.6--64.4  | 18.1--36.0<br>16.9--47.4 | 14.7--43.2<br>15.4--58.7 | 8.3--59.2<br>10.4--67.1  |
| 69 years   | 18.0--38.4<br>15.2--31.9 | 12.8--45.8<br>12.5--36.1 | 7.8--58.0<br>9.6--39.0  | 17.9--35.5<br>20.8--33.2 | 14.4--42.5<br>15.3--40.2 | 8.0--58.3<br>8.8--53.0   |
| 70 years   | 17.7--38.0<br>11.9--24.7 | 12.7--45.6<br>8.7--26.7  | 7.8--57.9<br>7.4--28.1  | 17.8--34.8<br>17.1--32.6 | 14.2--41.6<br>10.4--34.3 | 8.2--57.3<br>7.0--36.5   |
| 71 years   | 17.5--37.9<br>9.6--20.4  | 12.6--45.5<br>8.1--41.5  | 7.9--58.0<br>7.9--42.2  | 17.6--34.2<br>24.8--32.3 | 14.1--40.8<br>9.9--34.1  | 8.4--56.3<br>4.2--36.5   |
| 72 years   | 17.4--37.9<br>25.0--36.2 | 12.6--45.6<br>18.7--46.1 | 8.1--58.1<br>11.1--56.6 | 17.4--33.4<br>25.1--37.3 | 14.0--40.1<br>18.7--43.3 | 8.6--55.0<br>13.7--48.1  |
| 73 years   | 17.3--38.1<br>18.5--35.4 | 12.8--45.7<br>14.0--42.8 | 8.3--58.2<br>11.9--54.2 | 17.2--32.7<br>17.2--25.0 | 13.8--39.4<br>15.2--28.1 | 9.0--53.9<br>12.3--29.7  |
| 74 years   | 17.2--38.3<br>20.0--33.0 | 13.0--45.8<br>17.0--38.5 | 8.4--58.1<br>12.3--41.7 | 17.0--32.3<br>15.5--18.5 | 13.7--38.9<br>14.7--20.0 | 9.4--52.9<br>14.1--21.3  |
| 75 years   | 17.2--38.5<br>17.2--34.4 | 13.2--45.9<br>14.4--44.2 | 8.4--58.1<br>12.9--48.3 | 16.9--32.4<br>20.4--28.9 | 13.7--39.0<br>16.7--30.0 | 9.8--53.0<br>13.4--30.9  |
| 76 years   | 17.0--38.7<br>21.7--45.6 | 13.4--45.8<br>20.6--51.8 | 8.5--58.1<br>18.2--56.1 | 17.1--32.7<br>14.2--19.1 | 13.8--39.2<br>12.9--23.9 | 10.1--53.2<br>12.9--33.0 |
| 77 years   | 16.9--39.0<br>22.6--26.5 | 13.6--46.0<br>21.9--27.6 | 8.5--58.3<br>21.2--28.5 | 17.5--33.2<br>15.9--27.6 | 14.1--39.5<br>15.2--32.0 | 10.3--53.5<br>14.7--35.5 |
| 78 years   | 16.8--39.3<br>14.8--49.4 | 13.7--45.9<br>14.7--55.2 | 8.5--57.9<br>14.6--59.9 | 18.0--33.5<br>21.7--38.3 | 14.6--40.1<br>16.3--41.5 | 10.7--53.8<br>12.0--44.0 |
| 79 years   | 16.8--39.7<br>14.3--27.3 | 14.0--45.9<br>10.5--35.9 | 8.5--57.7<br>8.9--45.8  | 18.5--33.8<br>55.4--55.4 | 15.0--40.5<br>55.4--55.4 | 11.1--54.1<br>55.4--55.4 |
| 80 years   | 16.8--40.2<br>16.9--41.3 | 14.1--45.9<br>15.0--45.2 | 8.5--57.0<br>9.0--54.0  | 18.9--34.0<br>22.7--37.7 | 15.6--40.7<br>19.3--42.9 | 11.5--55.6<br>12.9--63.6 |
| > 80 years | N/A                      | N/A                      | N/A                     | N/A                      | N/A                      | N/A                      |

**Table S4.** Age norm lookup table for theta (4-8Hz) relative power (normalized to total power from 0.5 to 20Hz) during N1 at central channel, showed in percentages (%). In each cell, the first row is from smoothed value, the second row is from unsmoothed value (actual data). 5 to 11 months and > 80 years are not applicable since they are not present in the dataset.

| Age            | Male 50% range | Male 75% range | Male 95% range | Female 50% range | Female 75% range | Female 95% range |
|----------------|----------------|----------------|----------------|------------------|------------------|------------------|
| 0.5 months     | 8.3--11.3      | 7.2--12.3      | 5.7--14.1      | 8.1--11.0        | 7.0--12.3        | 5.6--14.3        |
|                | 10.4--13.3     | 9.1--14.6      | 7.3--17.6      | 10.4--13.3       | 9.1--14.6        | 7.3--17.6        |
| 1 months       | 8.4--11.4      | 7.3--12.5      | 5.7--14.4      | 8.2--11.2        | 7.1--12.5        | 5.7--14.6        |
|                | 9.8--12.6      | 9.1--14.0      | 7.3--16.7      | 9.8--12.6        | 9.1--14.0        | 7.3--16.7        |
| 1.5 months     | 8.5--11.7      | 7.4--12.9      | 5.8--14.9      | 8.4--11.5        | 7.2--12.9        | 5.8--15.0        |
|                | 9.1--12.2      | 7.8--13.5      | 5.4--16.8      | 9.1--12.2        | 7.8--13.5        | 5.4--16.8        |
| 2 months       | 8.7--12.1      | 7.5--13.4      | 5.9--15.6      | 8.6--11.9        | 7.4--13.4        | 5.9--15.7        |
|                | 8.2--12.4      | 7.0--14.3      | 5.4--17.4      | 8.2--12.4        | 7.0--14.3        | 5.4--17.4        |
| 2.5 months     | 9.0--12.6      | 7.7--14.0      | 6.0--16.5      | 8.9--12.5        | 7.7--14.0        | 6.0--16.6        |
|                | 8.3--12.9      | 6.7--14.6      | 5.9--17.7      | 8.3--12.9        | 6.7--14.6        | 5.9--17.7        |
| 3 months       | 9.2--13.2      | 8.0--14.8      | 6.2--17.6      | 9.3--13.2        | 8.0--14.8        | 6.2--17.6        |
|                | 9.2--13.2      | 7.3--14.5      | 6.0--17.1      | 9.2--13.2        | 7.3--14.5        | 6.0--17.1        |
| 3.5 months     | 9.6--13.9      | 8.2--15.7      | 6.3--18.8      | 9.7--14.0        | 8.4--15.7        | 6.4--18.7        |
|                | 9.9--13.2      | 9.1--14.9      | 8.2--16.3      | 9.9--13.2        | 9.1--14.9        | 8.2--16.3        |
| 4 months       | 9.8--14.5      | 8.5--16.5      | 6.5--19.9      | 10.1--14.8       | 8.7--16.5        | 6.5--19.8        |
|                | 9.2--13.3      | 8.1--15.1      | 6.9--17.5      | 9.2--13.3        | 8.1--15.1        | 6.9--17.5        |
| 5 to 11 months | N/A            | N/A            | N/A            | N/A              | N/A              | N/A              |
| 1 years        | 13.5--22.3     | 11.5--26.8     | 8.3--34.0      | 14.8--23.9       | 12.8--26.7       | 8.6--33.3        |
|                | 9.2--15.5      | 8.0--21.3      | 6.9--32.9      | 9.2--15.1        | 8.0--20.2        | 6.9--31.6        |
| 2 years        | 15.1--25.3     | 12.7--30.7     | 8.8--39.6      | 16.8--27.0       | 14.2--30.8       | 9.0--39.1        |
|                | 14.3--27.7     | 10.3--32.4     | 8.5--47.3      | 19.4--27.1       | 17.6--28.7       | 17.1--39.3       |
| 3 years        | 15.2--25.0     | 13.0--30.2     | 8.8--39.7      | 16.7--26.2       | 13.8--30.3       | 9.0--38.4        |
|                | 14.0--27.4     | 11.9--31.7     | 9.1--35.9      | 15.2--30.9       | 14.9--34.7       | 9.8--38.9        |
| 4 years        | 15.3--24.4     | 13.3--29.0     | 9.0--39.7      | 16.5--25.5       | 13.8--29.1       | 9.1--36.8        |
|                | 14.7--23.0     | 13.1--27.4     | 7.8--35.3      | 17.2--25.1       | 15.4--29.0       | 10.8--32.0       |
| 5 years        | 15.3--24.2     | 13.4--28.7     | 9.1--39.4      | 16.4--25.1       | 13.8--28.8       | 9.3--36.1        |
|                | 15.0--23.0     | 13.3--28.7     | 9.5--37.1      | 15.3--26.2       | 11.9--29.1       | 9.2--36.6        |
| 6 years        | 15.3--23.9     | 13.3--28.3     | 9.2--39.1      | 16.3--24.7       | 13.8--28.3       | 9.4--35.3        |
|                | 15.9--24.4     | 15.0--28.6     | 13.0--35.2     | 16.0--25.6       | 15.3--27.4       | 11.2--33.9       |
| 7 years        | 15.3--23.7     | 13.3--28.0     | 9.3--38.7      | 16.2--24.3       | 13.8--27.8       | 9.6--34.4        |
|                | 15.6--23.1     | 14.3--25.4     | 11.0--37.3     | 15.0--20.3       | 12.5--24.9       | 9.2--31.8        |
| 8 years        | 15.2--23.3     | 13.2--27.5     | 9.4--37.9      | 16.1--23.8       | 13.8--27.3       | 9.8--33.5        |
|                | 18.3--24.6     | 15.3--26.8     | 14.1--42.0     | 17.1--25.6       | 16.1--28.6       | 13.4--30.0       |
| 9 years        | 15.2--23.0     | 13.1--26.9     | 9.5--37.0      | 16.0--23.3       | 13.8--26.7       | 9.9--32.6        |
|                | 13.9--19.2     | 12.7--22.3     | 10.7--25.4     | 15.7--20.9       | 15.3--26.0       | 13.3--28.1       |
| 10 years       | 15.1--22.6     | 13.1--26.4     | 9.6--36.2      | 15.9--22.9       | 13.9--26.1       | 10.0--31.7       |
|                | 15.1--21.7     | 13.3--26.8     | 9.0--29.2      | 15.5--19.0       | 14.3--20.7       | 13.4--24.3       |
| 11 years       | 15.1--22.2     | 13.0--25.8     | 9.7--35.5      | 15.8--22.5       | 13.9--25.5       | 10.1--30.8       |
|                | 15.4--21.0     | 13.2--23.0     | 7.1--26.1      | 15.3--21.6       | 10.4--23.1       | 8.2--26.1        |
| 12 years       | 15.0--21.8     | 12.9--25.3     | 9.9--34.8      | 15.8--22.1       | 13.9--25.0       | 10.3--30.0       |
|                | 15.3--21.2     | 14.8--26.3     | 12.6--36.4     | 16.1--20.3       | 14.9--25.2       | 13.9--26.8       |
| 13 years       | 14.9--21.4     | 12.9--24.8     | 10.1--34.0     | 15.7--21.7       | 13.9--24.6       | 10.5--29.3       |
|                | 15.4--21.0     | 13.9--23.2     | 11.4--29.4     | 16.5--21.1       | 15.9--22.5       | 12.2--23.2       |

|          |                          |                          |                          |                          |                          |                          |
|----------|--------------------------|--------------------------|--------------------------|--------------------------|--------------------------|--------------------------|
| 14 years | 14.8--21.2<br>11.4--15.7 | 12.9--24.4<br>9.8--17.7  | 10.2--33.4<br>8.0--19.1  | 15.6--21.5<br>14.4--14.5 | 13.9--24.2<br>14.3--14.5 | 10.7--28.9<br>14.3--14.6 |
| 15 years | 14.7--20.9<br>14.4--25.2 | 12.8--24.1<br>14.1--31.2 | 10.4--32.7<br>14.0--40.4 | 15.6--21.4<br>15.7--18.9 | 14.0--24.0<br>15.0--19.8 | 10.9--29.2<br>13.6--23.1 |
| 16 years | 14.7--20.8<br>12.8--18.5 | 12.8--23.8<br>11.4--19.9 | 10.6--32.1<br>10.5--20.5 | 15.6--21.4<br>16.8--19.7 | 14.0--23.9<br>16.1--20.4 | 11.1--29.4<br>15.5--21.0 |
| 17 years | 14.6--20.6<br>14.7--19.6 | 12.7--23.5<br>13.2--20.7 | 10.8--31.3<br>11.9--21.3 | 15.6--21.4<br>14.6--23.5 | 14.0--23.8<br>13.5--25.6 | 11.2--29.7<br>10.9--27.7 |
| 18 years | 14.7--20.5<br>12.9--16.9 | 12.8--23.3<br>12.0--20.4 | 11.0--30.7<br>11.2--22.1 | 15.6--21.5<br>15.2--19.2 | 14.0--23.8<br>14.6--19.7 | 11.2--30.2<br>14.1--30.3 |
| 19 years | 14.7--20.3<br>15.6--18.8 | 12.8--23.0<br>15.4--21.0 | 11.2--29.9<br>14.9--28.0 | 15.7--21.7<br>17.5--18.6 | 14.0--23.8<br>17.0--20.4 | 11.2--30.7<br>16.7--22.6 |
| 20 years | 14.8--20.3<br>14.0--22.7 | 12.9--22.9<br>13.0--27.1 | 11.4--29.7<br>12.3--28.7 | 15.7--21.8<br>16.3--21.6 | 14.0--23.9<br>13.2--22.5 | 11.2--31.2<br>9.7--23.6  |
| 21 years | 14.9--20.3<br>15.5--19.6 | 13.0--22.8<br>13.4--21.2 | 11.6--29.5<br>13.0--22.4 | 15.8--22.0<br>13.9--21.4 | 14.0--24.0<br>12.2--22.7 | 11.3--31.8<br>11.8--28.1 |
| 22 years | 15.0--20.4<br>14.5--18.7 | 13.2--22.8<br>13.2--20.6 | 11.8--29.2<br>12.5--22.9 | 15.9--22.1<br>17.0--21.9 | 14.1--24.2<br>14.6--22.4 | 11.4--32.3<br>13.5--24.3 |
| 23 years | 15.1--20.5<br>16.2--20.6 | 13.3--22.8<br>12.4--22.3 | 12.0--28.9<br>12.0--24.0 | 16.0--22.3<br>17.1--23.8 | 14.1--24.4<br>16.0--25.0 | 11.4--32.8<br>13.9--28.9 |
| 24 years | 15.3--20.7<br>17.2--21.9 | 13.4--22.9<br>14.6--24.6 | 12.2--28.8<br>13.6--30.5 | 16.2--22.4<br>15.1--23.8 | 14.2--24.6<br>14.6--32.9 | 11.4--33.2<br>13.7--35.6 |
| 25 years | 15.5--20.9<br>15.8--19.1 | 13.6--23.0<br>14.2--21.8 | 12.4--28.7<br>13.1--24.8 | 16.3--22.4<br>14.0--22.6 | 14.3--24.6<br>13.7--32.5 | 11.3--33.3<br>13.0--42.8 |
| 26 years | 15.7--21.0<br>17.0--23.3 | 13.7--23.1<br>14.6--23.9 | 12.4--28.7<br>12.9--25.2 | 16.4--22.5<br>17.0--22.1 | 14.4--24.7<br>14.1--24.0 | 11.3--33.2<br>11.7--28.7 |
| 27 years | 15.8--21.2<br>13.9--19.3 | 13.9--23.2<br>13.3--22.1 | 12.5--28.8<br>11.6--25.3 | 16.5--22.5<br>18.1--23.0 | 14.5--24.7<br>17.8--24.2 | 11.1--32.9<br>16.3--29.5 |
| 28 years | 16.0--21.3<br>17.1--18.5 | 14.0--23.3<br>15.8--19.2 | 12.6--28.9<br>13.7--20.1 | 16.6--22.4<br>16.7--20.1 | 14.5--24.8<br>15.1--24.1 | 11.0--32.6<br>11.6--24.6 |
| 29 years | 16.1--21.4<br>15.3--20.1 | 14.1--23.4<br>13.9--21.8 | 12.6--29.0<br>13.3--24.8 | 16.6--22.4<br>15.7--23.8 | 14.6--24.8<br>14.1--25.6 | 10.8--32.3<br>9.6--33.1  |
| 30 years | 16.2--21.6<br>17.0--22.4 | 14.3--23.5<br>16.7--23.4 | 12.6--29.1<br>13.6--37.1 | 16.6--22.4<br>15.8--20.6 | 14.6--24.9<br>15.1--21.0 | 10.7--32.0<br>12.3--23.3 |
| 31 years | 16.3--21.8<br>16.3--20.6 | 14.4--23.7<br>14.6--22.3 | 12.6--29.4<br>13.5--24.8 | 16.6--22.3<br>17.8--21.3 | 14.6--24.9<br>16.9--25.4 | 10.6--31.7<br>10.2--30.1 |
| 32 years | 16.4--22.0<br>17.5--22.0 | 14.5--23.8<br>16.1--22.3 | 12.6--29.7<br>15.0--24.3 | 16.6--22.3<br>18.2--22.4 | 14.6--24.9<br>16.5--26.5 | 10.5--31.3<br>15.4--28.9 |
| 33 years | 16.4--22.1<br>17.6--22.6 | 14.6--24.0<br>14.3--25.0 | 12.5--30.1<br>12.0--28.2 | 16.5--22.2<br>17.8--23.8 | 14.6--24.9<br>14.8--27.8 | 10.3--30.8<br>13.2--29.8 |
| 34 years | 16.4--22.2<br>15.2--25.1 | 14.7--24.1<br>14.2--28.1 | 12.5--30.4<br>12.3--32.1 | 16.4--22.2<br>16.1--21.8 | 14.5--24.8<br>15.5--25.2 | 10.2--30.4<br>12.0--29.3 |
| 35 years | 16.4--22.2<br>18.4--23.8 | 14.8--24.2<br>17.6--25.6 | 12.4--30.7<br>15.3--32.0 | 16.3--22.1<br>14.7--21.0 | 14.4--24.7<br>11.8--23.1 | 10.2--30.1<br>8.6--24.0  |
| 36 years | 16.4--22.2<br>16.5--22.8 | 14.8--24.3<br>15.2--23.5 | 12.4--30.9<br>12.6--31.0 | 16.2--22.1<br>17.9--21.5 | 14.3--24.7<br>15.5--23.7 | 10.3--30.1<br>12.0--26.1 |
| 37 years | 16.4--22.2<br>15.4--20.0 | 14.9--24.4<br>14.9--24.0 | 12.3--31.1<br>12.7--24.6 | 16.1--22.2<br>16.5--21.7 | 14.2--24.7<br>14.7--24.1 | 10.4--30.2<br>11.0--29.7 |
| 38 years | 16.4--22.2<br>16.3--21.9 | 14.9--24.5<br>15.0--22.9 | 12.3--31.2<br>10.6--24.7 | 16.0--22.2<br>15.8--22.3 | 14.1--24.8<br>10.8--24.9 | 10.5--30.6<br>8.9--28.5  |



|          |                          |                          |                          |                          |                          |                          |
|----------|--------------------------|--------------------------|--------------------------|--------------------------|--------------------------|--------------------------|
| 39 years | 16.4--22.2<br>17.9--22.8 | 14.9--24.6<br>14.7--24.8 | 12.2--31.4<br>12.1--28.8 | 16.0--22.3<br>13.8--20.8 | 14.1--24.9<br>11.8--23.5 | 10.6--30.9<br>9.6--26.4  |
| 40 years | 16.4--22.1<br>16.1--20.1 | 14.9--24.7<br>15.0--21.8 | 12.2--31.7<br>12.8--27.2 | 15.9--22.4<br>16.5--22.5 | 14.0--24.9<br>14.4--24.5 | 10.8--31.0<br>12.7--35.2 |
| 41 years | 16.3--22.1<br>17.2--22.6 | 14.9--24.8<br>16.5--24.1 | 12.2--32.0<br>15.8--30.8 | 15.9--22.5<br>17.1--22.6 | 14.0--25.1<br>16.0--24.4 | 11.0--31.3<br>14.4--27.3 |
| 42 years | 16.3--22.1<br>16.1--19.8 | 14.8--24.9<br>15.0--24.0 | 12.3--32.3<br>12.4--34.8 | 15.8--22.6<br>16.1--21.5 | 14.1--25.1<br>15.3--23.0 | 11.2--31.5<br>13.9--25.8 |
| 43 years | 16.2--22.1<br>15.8--19.4 | 14.8--25.1<br>14.4--20.6 | 12.3--32.6<br>12.4--24.8 | 15.8--22.7<br>15.3--21.7 | 14.1--25.3<br>14.3--24.4 | 11.4--31.8<br>13.0--26.8 |
| 44 years | 16.2--22.1<br>16.6--23.9 | 14.7--25.2<br>15.0--28.3 | 12.3--32.8<br>12.9--31.4 | 15.8--22.9<br>13.9--21.4 | 14.1--25.5<br>12.5--23.3 | 11.5--32.1<br>12.0--23.8 |
| 45 years | 16.2--22.2<br>15.3--21.2 | 14.7--25.4<br>14.4--26.7 | 12.3--33.0<br>14.2--30.8 | 15.8--23.0<br>15.8--24.7 | 14.2--25.7<br>14.7--29.8 | 11.6--32.5<br>12.1--36.8 |
| 46 years | 16.1--22.2<br>17.9--23.7 | 14.6--25.6<br>16.8--27.5 | 12.3--33.4<br>13.8--32.1 | 15.8--23.2<br>16.8--24.0 | 14.2--25.9<br>15.4--26.7 | 11.8--32.8<br>14.5--35.2 |
| 47 years | 16.1--22.4<br>15.8--22.8 | 14.6--25.9<br>13.5--24.5 | 12.3--33.8<br>12.0--27.5 | 15.8--23.3<br>16.0--23.5 | 14.3--26.1<br>14.2--25.4 | 11.8--33.0<br>13.0--28.7 |
| 48 years | 16.1--22.5<br>16.7--20.9 | 14.5--26.2<br>14.8--25.0 | 12.3--34.2<br>14.0--32.3 | 15.8--23.4<br>17.1--22.7 | 14.4--26.3<br>14.4--24.4 | 11.8--33.1<br>11.4--36.1 |
| 49 years | 16.1--22.6<br>16.0--20.8 | 14.5--26.4<br>15.2--23.6 | 12.2--34.7<br>13.7--37.8 | 15.8--23.5<br>15.8--20.9 | 14.4--26.5<br>14.7--25.0 | 11.9--33.3<br>11.9--28.2 |
| 50 years | 16.0--22.8<br>15.4--23.7 | 14.4--26.7<br>14.0--30.0 | 12.1--35.2<br>10.7--35.6 | 15.8--23.6<br>15.6--25.7 | 14.4--26.6<br>14.3--30.4 | 11.9--33.4<br>13.0--34.6 |
| 51 years | 16.0--23.0<br>14.6--22.4 | 14.4--27.0<br>13.8--26.1 | 12.1--35.4<br>12.9--35.6 | 15.8--23.6<br>16.1--25.9 | 14.4--26.7<br>14.7--27.8 | 11.9--33.4<br>14.0--32.5 |
| 52 years | 16.0--23.2<br>16.0--20.4 | 14.4--27.2<br>14.4--25.0 | 12.0--35.7<br>13.6--29.8 | 15.8--23.7<br>15.8--22.7 | 14.4--26.7<br>15.3--26.0 | 11.9--33.8<br>12.6--27.2 |
| 53 years | 16.1--23.4<br>17.3--25.6 | 14.4--27.5<br>16.5--28.2 | 11.9--36.1<br>15.3--33.7 | 15.8--23.7<br>15.7--23.4 | 14.4--26.8<br>14.9--26.1 | 11.8--34.0<br>12.8--33.2 |
| 54 years | 16.1--23.6<br>16.7--25.9 | 14.4--27.7<br>15.5--28.2 | 11.8--36.4<br>10.6--28.8 | 15.9--23.7<br>13.9--23.6 | 14.5--26.9<br>12.5--26.1 | 11.8--34.4<br>10.9--29.8 |
| 55 years | 16.2--23.7<br>15.1--22.6 | 14.4--27.8<br>13.8--31.4 | 11.7--36.8<br>12.2--39.6 | 15.9--23.7<br>17.5--24.9 | 14.5--27.0<br>14.0--28.8 | 11.8--34.6<br>11.9--38.0 |
| 56 years | 16.2--23.9<br>18.2--21.5 | 14.4--28.0<br>17.1--26.9 | 11.6--37.1<br>12.7--35.6 | 15.9--23.7<br>16.2--21.8 | 14.5--27.0<br>14.7--25.7 | 11.8--34.8<br>14.2--31.3 |
| 57 years | 16.2--24.0<br>14.7--24.3 | 14.4--28.2<br>13.7--27.1 | 11.6--37.5<br>11.9--30.5 | 15.9--23.7<br>15.8--23.0 | 14.6--27.1<br>15.1--26.2 | 11.8--35.1<br>12.0--28.4 |
| 58 years | 16.2--24.2<br>16.3--22.6 | 14.5--28.4<br>14.6--24.3 | 11.5--37.9<br>12.8--32.8 | 15.9--23.7<br>16.4--23.0 | 14.6--27.2<br>15.5--32.6 | 11.8--35.4<br>12.3--42.7 |
| 59 years | 16.2--24.4<br>16.7--25.3 | 14.5--28.7<br>13.2--30.8 | 11.4--38.2<br>11.7--41.3 | 16.0--23.7<br>17.0--21.6 | 14.6--27.3<br>15.2--22.4 | 11.8--35.7<br>14.2--28.2 |
| 60 years | 16.3--24.6<br>15.7--25.9 | 14.5--28.9<br>15.4--29.4 | 11.4--38.4<br>13.8--42.6 | 16.0--23.7<br>16.6--25.4 | 14.6--27.4<br>15.5--25.8 | 11.8--35.9<br>15.0--38.5 |
| 61 years | 16.3--24.8<br>17.8--22.9 | 14.6--29.1<br>16.7--25.8 | 11.5--38.6<br>14.8--32.7 | 16.0--23.8<br>18.3--23.1 | 14.7--27.5<br>16.7--28.6 | 11.8--36.1<br>14.3--33.5 |
| 62 years | 16.3--24.9<br>14.8--25.9 | 14.6--29.3<br>13.6--27.3 | 11.4--38.8<br>12.8--38.2 | 16.0--23.9<br>14.9--18.2 | 14.7--27.6<br>14.4--26.0 | 11.8--36.3<br>12.3--32.0 |
| 63 years | 16.3--25.0<br>17.9--26.4 | 14.6--29.5<br>16.6--31.0 | 11.4--39.1<br>14.5--35.8 | 16.1--24.0<br>15.1--23.7 | 14.7--27.8<br>12.3--25.8 | 11.8--36.5<br>11.4--30.2 |

|            |                          |                          |                          |                          |                          |                          |
|------------|--------------------------|--------------------------|--------------------------|--------------------------|--------------------------|--------------------------|
| 64 years   | 16.3--25.3<br>16.0--22.3 | 14.7--29.9<br>14.5--24.5 | 11.4--39.2<br>11.2--26.7 | 16.1--24.1<br>18.1--27.9 | 14.8--28.0<br>17.2--32.0 | 11.8--36.7<br>15.3--35.8 |
| 65 years   | 16.3--25.5<br>16.7--24.6 | 14.7--30.2<br>15.3--29.0 | 11.4--39.3<br>8.8--40.8  | 16.2--24.1<br>17.0--26.9 | 14.8--28.1<br>13.8--27.9 | 11.8--37.0<br>12.0--32.0 |
| 66 years   | 16.3--25.7<br>16.5--28.2 | 14.7--30.4<br>15.5--31.0 | 11.5--39.4<br>15.1--34.1 | 16.2--24.2<br>17.4--22.7 | 14.8--28.2<br>12.2--24.7 | 11.8--37.3<br>11.2--28.0 |
| 67 years   | 16.3--25.9<br>15.0--24.0 | 14.7--30.8<br>13.4--30.3 | 11.5--39.4<br>12.9--37.6 | 16.2--24.3<br>16.0--23.2 | 14.8--28.4<br>15.4--29.5 | 11.8--38.1<br>12.3--37.3 |
| 68 years   | 16.4--26.0<br>19.0--26.0 | 14.7--31.0<br>14.6--29.5 | 11.6--39.2<br>11.1--39.6 | 16.3--24.5<br>15.4--23.4 | 14.9--28.6<br>14.7--24.4 | 11.8--39.3<br>14.4--32.1 |
| 69 years   | 16.5--26.2<br>14.6--25.8 | 14.7--31.0<br>12.4--33.0 | 11.6--38.9<br>11.6--35.9 | 16.4--24.7<br>16.4--26.3 | 14.9--28.8<br>13.8--29.1 | 11.8--40.5<br>13.2--37.9 |
| 70 years   | 16.5--26.3<br>18.5--27.1 | 14.7--31.1<br>17.0--30.3 | 11.7--38.5<br>15.3--34.2 | 16.5--25.1<br>18.9--24.5 | 15.0--29.1<br>17.6--27.9 | 11.8--42.0<br>14.5--42.6 |
| 71 years   | 16.7--26.5<br>16.9--27.7 | 14.8--31.1<br>15.4--39.7 | 11.8--38.1<br>14.2--42.2 | 16.6--25.4<br>17.4--25.5 | 15.0--29.4<br>16.0--29.6 | 11.8--43.4<br>15.8--38.8 |
| 72 years   | 16.7--26.7<br>21.4--28.4 | 14.8--31.1<br>20.1--30.9 | 11.9--37.8<br>14.5--33.4 | 16.7--25.8<br>17.4--23.9 | 15.0--29.8<br>16.6--27.3 | 11.8--44.8<br>14.2--30.2 |
| 73 years   | 16.9--26.9<br>16.7--25.4 | 14.9--31.0<br>15.1--29.8 | 12.1--37.4<br>12.1--32.6 | 16.9--26.2<br>13.6--17.6 | 15.1--30.2<br>12.8--19.1 | 11.8--46.3<br>12.6--21.0 |
| 74 years   | 17.0--27.0<br>22.0--31.3 | 14.9--30.9<br>18.9--32.9 | 12.2--37.1<br>15.8--33.3 | 17.0--26.4<br>20.1--30.8 | 15.2--30.6<br>15.8--42.0 | 11.8--47.7<br>12.4--51.1 |
| 75 years   | 17.0--27.2<br>17.7--25.0 | 14.9--30.9<br>17.3--26.7 | 12.4--36.8<br>16.0--28.0 | 17.0--26.8<br>17.4--23.5 | 15.3--31.1<br>16.7--24.5 | 11.7--49.1<br>16.0--24.9 |
| 76 years   | 17.2--27.3<br>14.9--20.5 | 14.8--30.8<br>14.2--23.4 | 12.5--36.5<br>13.8--24.1 | 17.1--27.0<br>16.0--29.2 | 15.4--31.6<br>11.8--29.9 | 11.9--49.6<br>11.4--54.5 |
| 77 years   | 17.4--27.5<br>22.3--28.6 | 14.7--30.8<br>19.2--28.7 | 12.6--36.3<br>16.8--28.9 | 17.1--27.4<br>21.2--27.8 | 15.5--32.1<br>17.9--27.8 | 12.1--50.1<br>15.3--27.9 |
| 78 years   | 17.9--27.8<br>13.0--20.8 | 14.9--31.1<br>12.6--21.8 | 12.8--36.0<br>12.2--22.6 | 17.1--27.6<br>21.5--39.5 | 15.6--32.1<br>19.0--45.8 | 12.2--49.5<br>17.1--50.8 |
| 79 years   | 18.2--28.1<br>19.6--27.5 | 14.9--31.4<br>18.3--29.6 | 12.9--35.9<br>17.3--29.8 | 17.1--27.3<br>32.0--32.0 | 15.7--31.9<br>32.0--32.0 | 12.3--48.5<br>32.0--32.0 |
| 80 years   | 18.6--28.4<br>19.3--30.1 | 15.2--31.7<br>15.9--35.0 | 13.1--35.9<br>13.6--36.7 | 17.1--26.8<br>16.8--21.7 | 15.7--31.5<br>15.8--27.5 | 12.4--46.6<br>13.4--32.9 |
| > 80 years | N/A                      | N/A                      | N/A                      | N/A                      | N/A                      | N/A                      |

**Table S5.** Age norm lookup table for sigma (11-15Hz) relative power (normalized to total power from 0.5 to 20Hz) during N2 at central channel, showed in percentages (%). In each cell, the first row is from smoothed value, the second row is from unsmoothed value (actual data). 5 to 11 months and > 80 years are not applicable since they are not present in the dataset.

| Age            | Male 50% range | Male 75% range | Male 95% range | Female 50% range | Female 75% range | Female 95% range |
|----------------|----------------|----------------|----------------|------------------|------------------|------------------|
| 0.5 months     | 0.7--1.8       | 0.6--2.5       | 0.4--3.4       | 0.7--1.8         | 0.6--2.4         | 0.4--3.3         |
|                | 0.9--1.9       | 0.8--2.5       | 0.5--3.4       | 0.9--1.9         | 0.8--2.5         | 0.5--3.4         |
| 1 months       | 0.7--1.8       | 0.6--2.5       | 0.4--3.4       | 0.7--1.8         | 0.6--2.4         | 0.4--3.3         |
|                | 0.8--2.2       | 0.7--2.9       | 0.5--3.5       | 0.8--2.2         | 0.7--2.9         | 0.5--3.5         |
| 1.5 months     | 0.8--1.8       | 0.6--2.5       | 0.4--3.4       | 0.7--1.8         | 0.6--2.4         | 0.4--3.3         |
|                | 0.8--2.2       | 0.7--2.9       | 0.4--3.6       | 0.8--2.2         | 0.7--2.9         | 0.4--3.6         |
| 2 months       | 0.8--1.8       | 0.6--2.4       | 0.4--3.4       | 0.8--1.8         | 0.6--2.4         | 0.4--3.3         |
|                | 0.7--1.8       | 0.6--2.3       | 0.4--3.3       | 0.7--1.8         | 0.6--2.3         | 0.4--3.3         |
| 2.5 months     | 0.8--1.8       | 0.6--2.4       | 0.4--3.4       | 0.8--1.8         | 0.6--2.4         | 0.4--3.3         |
|                | 0.8--1.9       | 0.6--2.3       | 0.4--3.0       | 0.8--1.9         | 0.6--2.3         | 0.4--3.0         |
| 3 months       | 0.8--1.8       | 0.6--2.4       | 0.4--3.4       | 0.8--1.8         | 0.6--2.4         | 0.4--3.4         |
|                | 1.0--2.1       | 0.7--2.6       | 0.6--3.5       | 1.0--2.1         | 0.7--2.6         | 0.6--3.5         |
| 3.5 months     | 0.8--1.8       | 0.6--2.4       | 0.5--3.3       | 0.8--1.8         | 0.7--2.4         | 0.5--3.4         |
|                | 0.9--1.7       | 0.7--2.3       | 0.5--3.4       | 0.9--1.7         | 0.7--2.3         | 0.5--3.4         |
| 4 months       | 0.8--1.8       | 0.7--2.4       | 0.5--3.3       | 0.9--1.9         | 0.7--2.4         | 0.5--3.4         |
|                | 0.8--1.4       | 0.5--2.0       | 0.4--3.3       | 0.8--1.4         | 0.5--2.0         | 0.4--3.3         |
| 5 to 11 months | N/A            | N/A            | N/A            | N/A              | N/A              | N/A              |
| 1 years        | 1.1--1.8       | 0.8--2.3       | 0.6--3.3       | 1.2--2.2         | 1.0--2.6         | 0.7--3.9         |
|                | 0.9--1.6       | 0.6--2.0       | 0.4--3.3       | 0.8--1.5         | 0.6--1.8         | 0.4--2.8         |
| 2 years        | 1.2--2.1       | 1.0--2.6       | 0.7--3.5       | 1.4--2.5         | 1.1--2.9         | 0.8--4.4         |
|                | 0.9--1.4       | 0.8--1.9       | 0.7--2.4       | 1.0--1.8         | 0.9--2.2         | 0.7--2.9         |
| 3 years        | 1.2--2.2       | 1.0--2.6       | 0.7--4.0       | 1.4--2.5         | 1.1--3.1         | 0.8--4.7         |
|                | 1.2--1.8       | 0.9--2.5       | 0.8--2.9       | 1.2--1.8         | 1.1--2.4         | 1.0--2.8         |
| 4 years        | 1.3--2.5       | 1.1--3.1       | 0.8--4.9       | 1.5--2.7         | 1.2--3.6         | 0.9--5.6         |
|                | 1.2--2.0       | 1.1--2.3       | 0.7--2.5       | 1.4--2.2         | 1.3--2.6         | 1.2--3.8         |
| 5 years        | 1.4--2.6       | 1.2--3.3       | 0.8--5.2       | 1.6--2.9         | 1.3--3.8         | 0.9--5.9         |
|                | 1.4--2.1       | 1.2--2.5       | 0.9--3.3       | 2.0--2.8         | 1.4--3.2         | 1.2--4.1         |
| 6 years        | 1.5--2.8       | 1.2--3.5       | 0.9--5.4       | 1.6--3.0         | 1.3--4.0         | 1.0--6.2         |
|                | 1.7--2.5       | 1.3--3.0       | 1.0--3.9       | 2.0--3.4         | 1.5--4.2         | 1.2--6.0         |
| 7 years        | 1.6--2.9       | 1.3--3.7       | 0.9--5.7       | 1.7--3.2         | 1.4--4.3         | 1.0--6.6         |
|                | 1.7--2.6       | 1.4--2.9       | 1.3--4.2       | 1.6--2.7         | 1.4--3.5         | 1.2--5.0         |
| 8 years        | 1.7--3.2       | 1.3--4.0       | 0.9--6.1       | 1.8--3.5         | 1.4--4.7         | 1.0--7.0         |
|                | 1.8--3.7       | 1.5--4.6       | 1.2--6.5       | 2.0--3.7         | 1.9--4.9         | 1.5--5.2         |
| 9 years        | 1.8--3.4       | 1.4--4.3       | 1.0--6.5       | 1.9--3.8         | 1.5--5.0         | 1.1--7.4         |
|                | 1.9--3.5       | 1.3--4.5       | 1.2--5.2       | 1.8--3.0         | 1.7--3.3         | 1.6--3.8         |
| 10 years       | 2.0--3.7       | 1.5--4.7       | 1.0--7.0       | 2.0--4.2         | 1.6--5.4         | 1.2--8.3         |
|                | 2.7--3.4       | 2.1--4.3       | 1.7--6.4       | 1.6--3.7         | 1.3--6.3         | 0.8--7.8         |
| 11 years       | 2.1--4.0       | 1.7--5.1       | 1.1--7.5       | 2.1--4.6         | 1.7--5.9         | 1.3--9.1         |
|                | 2.2--3.2       | 1.6--3.6       | 0.7--4.1       | 2.7--5.0         | 2.3--7.0         | 2.1--14.4        |
| 12 years       | 2.3--4.4       | 1.8--5.5       | 1.1--8.1       | 2.3--5.0         | 1.8--6.3         | 1.4--9.9         |
|                | 3.0--5.4       | 2.7--5.8       | 2.2--7.1       | 3.1--4.8         | 2.2--6.1         | 1.9--9.1         |
| 13 years       | 2.5--4.7       | 2.0--5.9       | 1.3--8.7       | 2.5--5.3         | 2.0--6.7         | 1.5--10.6        |
|                | 2.5--3.8       | 2.0--5.3       | 1.0--8.4       | 2.6--4.4         | 2.1--5.1         | 1.3--8.2         |

|          |                       |                        |                        |                      |                        |                        |
|----------|-----------------------|------------------------|------------------------|----------------------|------------------------|------------------------|
| 14 years | 2.7--5.1<br>3.1--4.8  | 2.2--6.2<br>2.9--5.4   | 1.5--9.3<br>2.8--6.1   | 2.7--5.7<br>3.1--5.1 | 2.2--7.1<br>2.6--5.7   | 1.6--11.3<br>2.2--6.1  |
| 15 years | 2.9--5.4<br>3.4--7.6  | 2.4--6.7<br>2.8--8.6   | 1.6--10.1<br>1.8--10.0 | 2.9--6.0<br>3.1--7.7 | 2.3--7.5<br>3.0--7.8   | 1.7--12.0<br>2.4--8.5  |
| 16 years | 3.1--5.8<br>4.7--6.2  | 2.6--7.1<br>4.5--6.8   | 1.8--10.8<br>4.3--7.3  | 3.0--6.3<br>7.0--7.7 | 2.5--7.9<br>6.8--7.9   | 1.8--12.7<br>6.6--8.0  |
| 17 years | 3.3--6.1<br>4.4--6.2  | 2.8--7.5<br>4.0--6.6   | 1.9--11.2<br>3.9--7.1  | 3.2--6.6<br>5.6--7.3 | 2.6--8.2<br>3.6--9.0   | 1.9--13.3<br>2.6--14.2 |
| 18 years | 3.5--6.3<br>3.3--6.3  | 2.9--7.8<br>3.0--9.1   | 2.1--11.7<br>2.7--11.3 | 3.4--6.8<br>3.7--7.0 | 2.8--8.5<br>3.3--9.2   | 2.0--13.8<br>2.7--9.4  |
| 19 years | 3.7--6.6<br>5.4--7.7  | 3.1--8.2<br>4.3--8.0   | 2.2--12.4<br>3.7--8.7  | 3.5--7.0<br>4.9--7.6 | 2.9--8.8<br>4.4--8.4   | 2.1--14.3<br>3.3--9.9  |
| 20 years | 3.8--6.9<br>5.8--7.7  | 3.2--8.5<br>5.1--9.3   | 2.3--12.9<br>4.0--11.8 | 3.7--7.2<br>4.1--7.3 | 3.1--9.0<br>3.3--11.7  | 2.3--14.8<br>2.5--19.1 |
| 21 years | 3.9--7.1<br>4.7--6.4  | 3.4--8.8<br>4.1--7.4   | 2.5--13.2<br>3.9--14.6 | 3.8--7.3<br>3.9--7.3 | 3.2--9.2<br>3.3--10.0  | 2.4--15.3<br>2.8--14.4 |
| 22 years | 4.1--7.3<br>4.8--7.1  | 3.5--9.1<br>4.0--12.0  | 2.6--13.5<br>3.1--12.8 | 3.9--7.3<br>3.8--5.6 | 3.3--9.3<br>3.5--6.1   | 2.5--15.5<br>3.4--25.7 |
| 23 years | 4.2--7.4<br>3.3--4.4  | 3.6--9.3<br>2.9--5.4   | 2.7--13.8<br>2.8--8.5  | 4.0--7.4<br>3.8--7.0 | 3.4--9.4<br>3.6--8.1   | 2.6--15.6<br>2.3--12.0 |
| 24 years | 4.3--7.6<br>3.8--6.3  | 3.6--9.5<br>3.6--7.4   | 2.8--13.9<br>3.0--12.9 | 4.1--7.4<br>4.4--6.4 | 3.5--9.6<br>3.9--7.1   | 2.7--15.8<br>3.4--12.3 |
| 25 years | 4.4--7.6<br>5.3--9.0  | 3.7--9.6<br>4.7--10.1  | 2.8--14.0<br>3.6--15.9 | 4.1--7.5<br>4.3--8.4 | 3.5--9.7<br>3.6--10.4  | 2.7--16.2<br>2.3--14.9 |
| 26 years | 4.4--7.7<br>4.4--9.0  | 3.7--9.8<br>3.9--9.7   | 2.8--14.2<br>3.5--12.1 | 4.2--7.6<br>4.2--7.1 | 3.6--9.8<br>3.4--8.9   | 2.8--16.6<br>3.2--10.2 |
| 27 years | 4.5--7.7<br>4.3--7.1  | 3.7--9.9<br>3.4--8.6   | 2.8--14.3<br>2.9--10.7 | 4.2--7.6<br>5.3--7.7 | 3.6--9.9<br>4.0--10.2  | 2.8--17.0<br>3.2--13.5 |
| 28 years | 4.5--7.8<br>4.8--8.4  | 3.8--10.0<br>4.2--9.8  | 2.8--14.4<br>3.7--12.6 | 4.2--7.7<br>4.3--5.4 | 3.6--10.1<br>3.4--8.6  | 2.9--17.4<br>3.3--11.5 |
| 29 years | 4.6--7.8<br>6.3--9.8  | 3.8--10.1<br>5.4--11.6 | 2.8--14.5<br>4.1--16.7 | 4.3--7.8<br>4.9--7.3 | 3.6--10.1<br>3.7--10.3 | 2.9--17.9<br>3.4--17.4 |
| 30 years | 4.6--7.9<br>4.8--8.5  | 3.8--10.1<br>4.1--11.1 | 2.8--14.7<br>3.6--12.1 | 4.3--7.9<br>4.3--8.9 | 3.7--10.2<br>3.8--10.1 | 2.9--18.3<br>3.0--13.9 |
| 31 years | 4.6--7.9<br>4.9--9.1  | 3.8--10.1<br>4.1--11.0 | 2.7--14.6<br>2.3--12.2 | 4.3--7.9<br>5.2--8.2 | 3.7--10.2<br>4.3--8.8  | 2.9--18.6<br>3.8--20.8 |
| 32 years | 4.6--7.9<br>5.4--7.5  | 3.8--10.1<br>4.6--8.2  | 2.7--14.5<br>3.2--8.9  | 4.4--7.9<br>4.1--6.9 | 3.7--10.2<br>3.6--7.4  | 2.9--18.9<br>3.0--14.6 |
| 33 years | 4.6--7.8<br>4.5--7.6  | 3.9--10.0<br>3.8--8.7  | 2.7--14.7<br>2.4--19.8 | 4.4--8.0<br>5.1--8.1 | 3.7--10.2<br>4.5--10.0 | 2.8--19.1<br>4.0--12.1 |
| 34 years | 4.6--7.8<br>4.3--6.5  | 3.9--10.0<br>4.0--7.4  | 2.7--14.8<br>3.0--12.1 | 4.4--8.0<br>3.7--9.0 | 3.7--10.3<br>3.3--12.7 | 2.8--19.4<br>1.8--16.1 |
| 35 years | 4.6--7.8<br>4.4--5.6  | 3.9--10.0<br>3.8--7.4  | 2.7--14.7<br>3.0--11.5 | 4.4--8.0<br>3.9--8.4 | 3.7--10.3<br>3.4--12.3 | 2.7--19.5<br>3.2--27.1 |
| 36 years | 4.6--7.8<br>4.0--7.7  | 3.9--10.0<br>3.7--9.8  | 2.7--14.7<br>2.9--16.3 | 4.4--7.9<br>4.9--7.5 | 3.7--10.3<br>4.4--11.5 | 2.7--19.5<br>3.0--19.6 |
| 37 years | 4.6--7.8<br>5.6--11.1 | 3.9--10.1<br>5.3--16.7 | 2.7--14.6<br>3.4--20.4 | 4.4--7.9<br>4.9--8.6 | 3.7--10.3<br>4.5--11.3 | 2.6--19.4<br>3.6--16.3 |
| 38 years | 4.5--7.8<br>6.0--7.7  | 3.9--10.0<br>5.7--10.7 | 2.7--14.4<br>5.3--11.4 | 4.4--7.9<br>4.4--7.6 | 3.6--10.2<br>4.1--7.8  | 2.5--19.2<br>2.7--17.7 |

|          |                      |                        |                        |                       |                        |                        |
|----------|----------------------|------------------------|------------------------|-----------------------|------------------------|------------------------|
| 39 years | 4.5--7.8<br>4.8--7.7 | 3.9--10.0<br>3.9--10.2 | 2.7--14.1<br>3.4--11.3 | 4.3--7.9<br>4.3--8.2  | 3.6--10.3<br>3.8--9.4  | 2.5--19.2<br>3.5--13.8 |
| 40 years | 4.5--7.8<br>4.9--9.3 | 3.9--10.0<br>4.2--9.8  | 2.7--13.9<br>3.1--12.4 | 4.3--7.9<br>3.9--6.6  | 3.6--10.3<br>3.3--7.6  | 2.4--19.2<br>2.5--10.8 |
| 41 years | 4.4--7.7<br>4.0--7.1 | 3.8--9.9<br>3.7--9.1   | 2.7--13.9<br>3.0--10.7 | 4.3--8.0<br>4.5--7.3  | 3.5--10.4<br>4.2--8.4  | 2.4--19.3<br>2.6--12.0 |
| 42 years | 4.4--7.7<br>4.2--7.9 | 3.8--9.9<br>3.9--9.6   | 2.7--13.9<br>3.0--14.8 | 4.3--8.0<br>4.2--6.6  | 3.5--10.5<br>3.8--9.4  | 2.3--19.3<br>3.0--14.8 |
| 43 years | 4.4--7.7<br>4.9--9.0 | 3.8--9.9<br>4.5--10.3  | 2.7--13.9<br>3.7--11.5 | 4.2--8.1<br>4.1--8.5  | 3.5--10.6<br>3.5--10.3 | 2.3--19.4<br>2.0--27.3 |
| 44 years | 4.4--7.7<br>4.6--9.9 | 3.8--9.8<br>3.6--11.9  | 2.7--13.8<br>2.7--12.6 | 4.2--8.2<br>4.0--7.3  | 3.5--10.7<br>3.1--11.7 | 2.3--19.6<br>2.5--15.4 |
| 45 years | 4.4--7.7<br>4.0--6.6 | 3.7--9.7<br>3.3--6.7   | 2.7--13.9<br>2.1--8.1  | 4.2--8.2<br>4.0--6.7  | 3.4--10.9<br>3.3--8.6  | 2.3--19.6<br>2.6--10.8 |
| 46 years | 4.4--7.6<br>4.1--5.8 | 3.7--9.7<br>3.5--6.5   | 2.7--14.0<br>3.0--7.3  | 4.2--8.3<br>4.4--8.9  | 3.4--11.0<br>3.9--11.3 | 2.3--19.7<br>2.7--14.4 |
| 47 years | 4.4--7.6<br>4.8--7.6 | 3.7--9.6<br>4.5--8.6   | 2.7--14.1<br>2.9--10.0 | 4.2--8.4<br>4.2--10.3 | 3.4--11.1<br>3.8--12.6 | 2.2--19.8<br>2.3--22.0 |
| 48 years | 4.4--7.5<br>4.8--8.1 | 3.7--9.5<br>3.8--10.0  | 2.7--14.4<br>3.4--13.0 | 4.2--8.5<br>4.1--7.4  | 3.4--11.2<br>3.7--9.1  | 2.2--19.9<br>2.8--13.3 |
| 49 years | 4.3--7.5<br>4.1--6.7 | 3.6--9.4<br>3.4--7.7   | 2.7--14.7<br>2.5--14.5 | 4.2--8.6<br>4.1--11.4 | 3.4--11.3<br>3.5--15.0 | 2.2--19.8<br>3.1--21.3 |
| 50 years | 4.3--7.5<br>4.3--7.8 | 3.6--9.4<br>3.6--12.0  | 2.7--15.0<br>3.1--15.5 | 4.2--8.6<br>3.6--9.4  | 3.4--11.4<br>3.1--11.7 | 2.2--19.8<br>1.1--18.4 |
| 51 years | 4.3--7.5<br>4.4--8.7 | 3.6--9.4<br>3.0--10.8  | 2.7--15.1<br>2.6--18.2 | 4.2--8.7<br>4.3--7.3  | 3.4--11.4<br>3.3--9.8  | 2.2--19.5<br>2.4--13.5 |
| 52 years | 4.3--7.5<br>4.1--7.4 | 3.6--9.4<br>3.9--7.7   | 2.7--15.1<br>3.4--17.4 | 4.3--8.7<br>5.8--8.9  | 3.5--11.3<br>4.6--10.5 | 2.2--19.2<br>2.7--17.6 |
| 53 years | 4.3--7.5<br>5.1--7.0 | 3.6--9.3<br>4.1--8.1   | 2.6--15.0<br>3.7--10.4 | 4.3--8.6<br>4.2--7.3  | 3.5--11.3<br>3.6--13.3 | 2.2--18.7<br>2.3--18.1 |
| 54 years | 4.3--7.5<br>4.5--7.3 | 3.6--9.3<br>3.7--9.8   | 2.6--15.0<br>2.8--17.9 | 4.3--8.6<br>4.2--8.9  | 3.5--11.2<br>3.4--10.7 | 2.3--18.2<br>2.0--20.1 |
| 55 years | 4.3--7.6<br>4.9--7.4 | 3.6--9.4<br>4.1--10.0  | 2.6--15.0<br>3.8--10.9 | 4.3--8.6<br>4.1--8.1  | 3.6--11.0<br>3.6--10.7 | 2.2--17.8<br>2.2--14.7 |
| 56 years | 4.3--7.6<br>4.8--7.2 | 3.5--9.5<br>4.0--8.5   | 2.6--15.0<br>3.7--10.6 | 4.3--8.5<br>4.5--9.4  | 3.6--10.9<br>3.8--10.8 | 2.2--17.3<br>3.4--14.5 |
| 57 years | 4.2--7.6<br>3.2--6.9 | 3.5--9.5<br>2.8--8.5   | 2.5--14.9<br>2.7--12.8 | 4.3--8.4<br>4.2--8.1  | 3.6--10.7<br>4.0--9.1  | 2.2--16.9<br>3.5--12.5 |
| 58 years | 4.2--7.6<br>3.8--8.1 | 3.4--9.5<br>3.1--8.7   | 2.4--14.9<br>2.6--14.8 | 4.3--8.3<br>5.0--8.2  | 3.6--10.6<br>4.6--12.2 | 2.2--16.4<br>3.6--17.1 |
| 59 years | 4.1--7.5<br>5.5--7.3 | 3.4--9.5<br>4.3--7.6   | 2.4--14.7<br>4.1--7.9  | 4.3--8.2<br>3.7--9.8  | 3.5--10.4<br>2.8--10.4 | 2.2--16.1<br>2.5--13.4 |
| 60 years | 4.1--7.5<br>4.7--8.4 | 3.3--9.5<br>3.5--10.7  | 2.3--14.6<br>1.5--12.8 | 4.2--8.2<br>5.2--7.5  | 3.5--10.2<br>4.1--7.9  | 2.2--15.8<br>2.0--9.5  |
| 61 years | 4.0--7.4<br>4.2--8.1 | 3.2--9.5<br>4.0--11.0  | 2.2--14.4<br>2.3--18.0 | 4.2--8.1<br>4.8--8.2  | 3.5--10.1<br>3.8--10.7 | 2.2--15.6<br>2.9--14.1 |
| 62 years | 4.0--7.3<br>4.4--8.9 | 3.2--9.4<br>3.7--10.2  | 2.2--14.2<br>3.1--11.1 | 4.2--8.1<br>4.7--7.6  | 3.4--9.9<br>4.0--9.3   | 2.2--15.5<br>2.9--11.2 |
| 63 years | 3.9--7.3<br>3.8--7.4 | 3.1--9.3<br>3.5--8.8   | 2.2--14.2<br>2.9--9.2  | 4.1--8.0<br>4.1--7.7  | 3.3--9.8<br>3.6--8.8   | 2.2--15.3<br>2.9--13.0 |

|            |                       |                       |                        |                      |                       |                        |
|------------|-----------------------|-----------------------|------------------------|----------------------|-----------------------|------------------------|
| 64 years   | 3.8--7.1<br>4.5--10.3 | 3.0--9.2<br>3.1--12.5 | 2.1--14.2<br>2.3--15.8 | 4.0--8.0<br>4.2--6.6 | 3.3--9.6<br>3.9--6.8  | 2.2--15.3<br>2.8--13.3 |
| 65 years   | 3.7--7.0<br>4.0--6.5  | 2.9--9.1<br>3.0--10.1 | 2.1--14.1<br>2.2--14.9 | 4.0--8.0<br>2.7--5.5 | 3.2--9.6<br>2.2--8.4  | 2.2--15.3<br>1.4--12.9 |
| 66 years   | 3.7--6.9<br>3.0--5.8  | 2.9--8.9<br>2.8--7.2  | 2.0--14.0<br>2.1--7.7  | 3.9--8.0<br>4.5--7.6 | 3.1--9.5<br>3.5--8.2  | 2.1--15.4<br>2.5--9.9  |
| 67 years   | 3.6--6.7<br>4.0--5.8  | 2.8--8.7<br>3.4--7.3  | 2.0--13.5<br>1.9--13.2 | 3.8--7.9<br>3.9--9.2 | 3.0--9.5<br>3.5--11.5 | 2.1--15.4<br>2.8--17.4 |
| 68 years   | 3.6--6.6<br>3.1--6.9  | 2.8--8.6<br>2.8--8.0  | 2.0--13.1<br>2.0--12.7 | 3.8--7.9<br>3.5--8.5 | 3.0--9.4<br>3.0--12.1 | 2.1--15.3<br>2.8--16.1 |
| 69 years   | 3.5--6.5<br>2.6--5.6  | 2.8--8.4<br>2.4--6.8  | 2.0--12.7<br>1.9--8.3  | 3.7--7.9<br>3.7--6.9 | 2.9--9.3<br>2.4--7.4  | 2.1--15.1<br>2.2--10.6 |
| 70 years   | 3.5--6.4<br>2.8--6.9  | 2.8--8.3<br>2.4--8.2  | 2.0--12.4<br>2.1--8.2  | 3.6--7.8<br>4.4--7.7 | 2.8--9.2<br>3.5--8.4  | 2.1--15.0<br>2.3--9.6  |
| 71 years   | 3.5--6.3<br>4.0--6.1  | 2.8--8.1<br>3.8--6.1  | 2.0--12.2<br>3.1--9.1  | 3.6--7.7<br>2.6--8.7 | 2.8--9.2<br>2.3--8.9  | 2.0--15.0<br>2.0--9.2  |
| 72 years   | 3.5--6.3<br>3.8--5.4  | 2.8--8.0<br>3.1--6.6  | 2.1--12.0<br>2.5--8.0  | 3.5--7.5<br>3.9--8.3 | 2.8--9.2<br>3.5--10.3 | 2.0--14.9<br>2.6--12.9 |
| 73 years   | 3.5--6.2<br>3.2--7.5  | 2.9--7.8<br>3.1--8.8  | 2.1--11.9<br>2.6--9.2  | 3.4--7.3<br>5.8--9.9 | 2.7--8.9<br>4.2--11.9 | 2.0--14.5<br>3.9--14.1 |
| 74 years   | 3.5--6.2<br>3.1--5.2  | 2.9--7.7<br>3.0--7.8  | 2.1--11.4<br>2.3--18.5 | 3.3--7.1<br>2.6--4.4 | 2.7--8.6<br>2.1--4.5  | 2.0--14.2<br>1.7--4.6  |
| 75 years   | 3.5--6.1<br>4.1--5.6  | 2.8--7.6<br>3.6--6.3  | 2.1--11.0<br>3.3--7.0  | 3.3--6.8<br>3.3--8.9 | 2.7--8.3<br>2.9--12.3 | 2.0--13.5<br>2.8--15.2 |
| 76 years   | 3.5--6.1<br>4.8--6.3  | 2.8--7.5<br>4.6--7.4  | 2.1--10.8<br>3.8--7.6  | 3.3--6.6<br>3.0--5.1 | 2.8--8.0<br>2.8--5.4  | 2.0--13.0<br>2.0--6.0  |
| 77 years   | 3.4--6.1<br>4.3--6.6  | 2.8--7.4<br>4.0--7.4  | 2.1--10.6<br>3.8--8.0  | 3.3--6.3<br>3.3--5.9 | 2.8--7.6<br>3.2--7.1  | 2.0--12.4<br>3.1--8.1  |
| 78 years   | 3.4--6.0<br>5.6--10.4 | 2.7--7.2<br>5.5--12.7 | 2.1--10.1<br>5.5--14.5 | 3.3--6.0<br>3.2--4.5 | 2.8--7.2<br>2.8--5.0  | 2.0--11.8<br>2.4--5.4  |
| 79 years   | 3.3--6.0<br>2.4--4.0  | 2.7--7.1<br>2.0--4.8  | 2.1--9.9<br>1.5--5.7   | 3.3--5.8<br>5.4--5.4 | 2.8--6.9<br>5.4--5.4  | 2.0--11.3<br>5.4--5.4  |
| 80 years   | 3.2--6.0<br>2.9--5.8  | 2.6--7.0<br>2.5--6.5  | 2.2--9.8<br>2.3--8.4   | 3.3--5.6<br>3.7--4.5 | 2.9--6.6<br>2.9--5.3  | 2.0--10.9<br>1.8--8.9  |
| > 80 years | N/A                   | N/A                   | N/A                    | N/A                  | N/A                   | N/A                    |

Table S6. Age norm lookup table for delta (1-4Hz) relative power (normalized to total power from 0.5 to 20Hz) during N3 at central channel, showed in percentages (%). In each cell, the first row is from smoothed value, the second row is from unsmoothed value (actual data). 5 to 11 months and > 80 years are not applicable since they are not present in the dataset.

| Age            | Male 50% range           | Male 75% range           | Male 95% range           | Female 50% range         | Female 75% range         | Female 95% range         |
|----------------|--------------------------|--------------------------|--------------------------|--------------------------|--------------------------|--------------------------|
| 0.5 months     | 72.5--80.6<br>68.4--75.9 | 69.2--81.6<br>67.0--76.4 | 51.7--83.0<br>63.3--78.2 | 72.5--80.6<br>68.4--75.9 | 69.5--81.5<br>67.0--76.4 | 51.7--83.0<br>63.3--78.2 |
| 1 months       | 72.3--80.4<br>68.4--76.1 | 69.1--81.4<br>66.1--77.3 | 51.6--82.8<br>62.2--79.2 | 72.3--80.4<br>68.4--76.1 | 69.3--81.3<br>66.1--77.3 | 51.6--82.8<br>62.2--79.2 |
| 1.5 months     | 72.0--80.1<br>68.5--77.6 | 68.8--81.1<br>65.0--78.9 | 51.5--82.6<br>48.4--80.7 | 72.0--80.1<br>68.5--77.6 | 69.0--81.0<br>65.0--78.9 | 51.5--82.6<br>48.4--80.7 |
| 2 months       | 71.6--79.6<br>69.0--78.7 | 68.5--80.7<br>65.3--79.5 | 51.4--82.2<br>47.6--81.2 | 71.6--79.6<br>69.0--78.7 | 68.6--80.6<br>65.3--79.5 | 51.4--82.2<br>47.6--81.2 |
| 2.5 months     | 71.1--79.0<br>68.7--78.5 | 68.0--80.1<br>65.4--79.5 | 51.3--81.8<br>44.5--81.3 | 71.1--79.0<br>68.7--78.5 | 68.1--80.1<br>65.4--79.5 | 51.3--81.8<br>44.5--81.3 |
| 3 months       | 70.5--78.3<br>68.2--78.4 | 67.4--79.4<br>65.4--79.6 | 51.1--81.2<br>44.2--81.0 | 70.5--78.3<br>68.2--78.4 | 67.4--79.4<br>65.4--79.6 | 51.1--81.2<br>44.2--81.0 |
| 3.5 months     | 69.8--77.5<br>74.0--79.0 | 66.8--78.7<br>70.3--79.9 | 50.9--80.6<br>65.4--80.7 | 69.8--77.5<br>74.0--79.0 | 66.7--78.7<br>70.3--79.9 | 50.9--80.7<br>65.4--80.7 |
| 4 months       | 69.2--76.8<br>76.2--79.8 | 66.2--77.9<br>74.6--80.5 | 50.7--80.1<br>56.9--82.6 | 69.2--76.7<br>76.2--79.8 | 66.0--78.0<br>74.6--80.5 | 50.7--80.1<br>56.9--82.6 |
| 5 to 11 months | N/A                      | N/A                      | N/A                      | N/A                      | N/A                      | N/A                      |
| 1 years        | 60.4--67.2<br>59.9--79.5 | 58.0--68.8<br>57.3--80.3 | 47.1--72.8<br>54.6--82.6 | 60.4--67.1<br>66.2--79.6 | 56.8--69.4<br>57.6--80.4 | 47.0--72.9<br>51.9--82.6 |
| 2 years        | 54.3--62.3<br>55.4--60.9 | 51.9--64.2<br>51.5--63.4 | 43.2--69.1<br>45.5--68.1 | 54.4--62.1<br>56.7--61.7 | 50.5--65.1<br>52.0--64.9 | 42.7--68.9<br>46.5--67.0 |
| 3 years        | 55.0--62.9<br>54.7--61.5 | 52.6--65.0<br>52.9--64.7 | 45.0--69.5<br>46.5--69.8 | 55.4--63.0<br>57.7--62.5 | 51.6--65.9<br>54.6--63.9 | 44.3--70.0<br>45.7--68.6 |
| 4 years        | 54.9--63.3<br>54.1--61.8 | 52.4--65.9<br>52.6--63.7 | 45.2--70.2<br>46.2--68.0 | 55.6--64.0<br>53.6--62.7 | 51.8--66.7<br>49.0--63.4 | 45.6--71.0<br>47.7--71.8 |
| 5 years        | 54.9--63.3<br>56.4--63.5 | 52.3--66.1<br>53.7--64.5 | 45.2--70.3<br>43.2--69.3 | 55.5--64.2<br>54.5--62.5 | 51.8--66.9<br>52.6--64.0 | 45.9--71.0<br>41.5--69.8 |
| 6 years        | 54.8--63.4<br>56.8--63.5 | 52.2--66.2<br>51.0--65.8 | 45.2--70.5<br>38.4--70.7 | 55.5--64.4<br>53.7--62.1 | 51.9--67.0<br>48.3--66.7 | 46.2--71.1<br>47.2--70.1 |
| 7 years        | 54.7--63.5<br>54.3--64.5 | 52.1--66.5<br>53.3--66.1 | 45.3--70.6<br>50.9--68.6 | 55.4--64.7<br>55.9--64.5 | 51.9--67.2<br>54.2--65.6 | 46.5--71.1<br>48.7--67.6 |
| 8 years        | 54.6--63.5<br>53.9--63.9 | 51.8--66.6<br>51.2--68.1 | 45.3--70.8<br>45.6--71.2 | 55.3--64.9<br>58.7--67.2 | 51.8--67.3<br>53.0--70.8 | 46.7--71.1<br>49.2--72.9 |
| 9 years        | 54.3--63.5<br>57.1--64.0 | 51.5--66.8<br>54.0--66.2 | 45.2--70.9<br>52.7--71.2 | 55.1--65.0<br>55.0--66.9 | 51.7--67.4<br>53.2--68.9 | 46.9--71.1<br>51.7--70.0 |
| 10 years       | 53.9--63.3<br>58.3--67.4 | 51.2--66.7<br>52.0--69.4 | 45.2--71.0<br>51.1--71.0 | 54.8--65.1<br>58.1--65.0 | 51.5--67.5<br>55.2--66.7 | 46.9--71.1<br>53.8--68.3 |
| 11 years       | 53.5--63.0<br>55.9--63.5 | 50.7--66.5<br>52.7--68.6 | 44.9--71.0<br>45.0--70.5 | 54.3--64.6<br>63.4--68.1 | 51.2--67.4<br>60.3--68.8 | 46.7--71.0<br>52.9--70.7 |
| 12 years       | 52.9--62.6<br>54.1--64.5 | 50.1--66.2<br>52.0--66.9 | 44.4--70.8<br>46.2--75.7 | 53.8--64.0<br>62.3--67.7 | 50.7--66.9<br>57.1--69.7 | 46.3--70.6<br>51.7--74.8 |
| 13 years       | 52.3--61.9<br>54.0--63.8 | 49.5--65.6<br>51.4--67.9 | 44.1--70.1<br>38.8--70.1 | 53.1--63.2<br>53.6--65.3 | 50.2--66.1<br>49.9--66.4 | 45.9--69.7<br>47.4--69.8 |

|          |                          |                          |                          |                          |                          |                          |
|----------|--------------------------|--------------------------|--------------------------|--------------------------|--------------------------|--------------------------|
| 14 years | 51.6--61.1<br>53.0--61.7 | 48.7--64.9<br>48.9--62.5 | 43.6--69.4<br>45.6--63.2 | 52.5--62.4<br>53.1--54.7 | 49.6--65.2<br>52.6--55.1 | 45.3--68.9<br>52.3--55.5 |
| 15 years | 50.8--60.2<br>48.8--59.0 | 47.9--63.9<br>48.3--60.1 | 43.0--68.6<br>47.8--62.4 | 51.8--61.4<br>52.6--55.4 | 49.0--64.3<br>50.3--56.7 | 44.7--68.0<br>49.0--57.1 |
| 16 years | 49.9--59.2<br>50.8--53.8 | 47.0--62.9<br>49.9--54.3 | 42.5--67.7<br>49.5--54.5 | 51.1--60.5<br>52.3--53.4 | 48.3--63.5<br>52.0--53.7 | 43.9--67.1<br>51.8--53.9 |
| 17 years | 49.1--58.2<br>50.1--54.6 | 46.2--61.8<br>49.3--56.0 | 41.8--66.7<br>49.2--57.8 | 50.4--59.5<br>49.1--57.7 | 47.6--62.6<br>48.8--60.1 | 43.1--66.3<br>48.3--61.4 |
| 18 years | 48.2--57.2<br>49.4--56.2 | 45.4--60.7<br>47.8--57.9 | 41.0--65.8<br>43.1--59.2 | 49.7--58.4<br>46.9--53.3 | 46.9--61.7<br>46.8--55.0 | 42.2--65.6<br>42.6--59.1 |
| 19 years | 47.3--56.1<br>46.8--51.9 | 44.5--59.5<br>45.1--56.7 | 40.2--64.8<br>45.0--61.1 | 49.0--57.3<br>54.1--57.6 | 46.1--60.7<br>51.6--59.6 | 41.1--64.7<br>48.9--61.5 |
| 20 years | 46.4--55.0<br>47.3--53.7 | 43.8--58.3<br>46.2--55.3 | 39.4--63.8<br>46.0--58.8 | 48.3--56.3<br>48.2--54.1 | 45.4--59.7<br>45.4--56.0 | 40.0--64.1<br>41.9--57.9 |
| 21 years | 45.6--54.0<br>42.9--52.8 | 43.0--57.1<br>41.0--56.5 | 38.6--62.7<br>39.5--61.5 | 47.6--55.2<br>46.6--52.8 | 44.7--58.7<br>44.4--54.9 | 39.0--63.6<br>43.8--58.6 |
| 22 years | 44.9--53.1<br>42.4--51.3 | 42.4--56.1<br>42.0--53.5 | 37.9--61.7<br>35.0--53.9 | 47.0--54.3<br>42.4--49.9 | 44.1--57.8<br>40.9--52.2 | 38.2--63.0<br>32.3--57.1 |
| 23 years | 44.3--52.3<br>45.0--51.5 | 41.7--55.2<br>44.7--59.2 | 37.4--60.7<br>44.5--63.9 | 46.6--53.8<br>49.5--53.2 | 43.5--57.0<br>45.6--55.4 | 37.4--62.6<br>44.7--59.4 |
| 24 years | 43.8--51.6<br>42.7--50.6 | 41.2--54.4<br>40.3--52.8 | 36.9--59.7<br>39.2--56.9 | 46.1--53.4<br>46.4--54.2 | 43.1--56.5<br>46.0--58.2 | 36.9--62.3<br>39.2--63.3 |
| 25 years | 43.3--51.1<br>43.4--50.6 | 40.8--53.8<br>41.4--52.2 | 36.5--59.0<br>36.5--53.9 | 45.7--53.2<br>47.2--50.1 | 42.6--56.3<br>43.9--52.0 | 36.4--62.6<br>37.2--54.7 |
| 26 years | 43.0--50.7<br>42.9--47.2 | 40.5--53.3<br>41.6--50.1 | 36.1--58.5<br>39.6--52.4 | 45.3--53.0<br>48.4--55.2 | 42.2--56.1<br>42.7--57.6 | 35.9--62.7<br>31.5--59.6 |
| 27 years | 42.7--50.4<br>44.0--51.1 | 40.2--53.0<br>40.9--53.7 | 35.6--58.0<br>33.8--56.3 | 45.0--52.8<br>45.9--50.0 | 41.8--55.9<br>41.9--56.6 | 35.5--62.6<br>40.0--63.9 |
| 28 years | 42.4--50.2<br>44.0--49.9 | 40.0--52.8<br>42.6--52.5 | 35.1--57.4<br>39.0--57.9 | 44.7--52.6<br>45.0--54.6 | 41.4--55.6<br>43.9--57.0 | 35.3--62.6<br>41.4--67.2 |
| 29 years | 42.2--49.9<br>41.0--48.7 | 39.8--52.6<br>39.9--50.6 | 34.8--57.0<br>38.4--56.3 | 44.4--52.4<br>43.6--49.6 | 41.1--55.3<br>38.7--51.3 | 35.0--62.4<br>34.9--56.6 |
| 30 years | 42.0--49.8<br>39.6--50.0 | 39.6--52.5<br>37.4--51.3 | 34.6--56.7<br>35.5--54.4 | 44.1--52.2<br>42.7--53.5 | 40.7--55.0<br>40.4--56.7 | 34.7--62.1<br>36.5--62.7 |
| 31 years | 41.9--49.6<br>42.8--49.3 | 39.4--52.4<br>40.0--52.6 | 34.4--56.3<br>34.7--58.3 | 43.8--52.0<br>43.1--52.3 | 40.4--54.8<br>41.4--53.5 | 34.7--61.8<br>37.9--63.7 |
| 32 years | 41.9--49.5<br>42.4--49.1 | 39.3--52.3<br>39.0--51.2 | 34.3--56.0<br>36.3--53.0 | 43.6--51.9<br>43.8--52.3 | 40.1--54.5<br>38.5--54.6 | 34.6--61.2<br>36.8--60.9 |
| 33 years | 41.8--49.4<br>42.0--47.8 | 39.3--52.2<br>40.5--49.9 | 34.2--55.8<br>36.4--52.4 | 43.4--51.7<br>43.2--51.3 | 39.8--54.3<br>40.9--54.2 | 34.6--60.5<br>36.7--57.5 |
| 34 years | 41.8--49.3<br>40.9--49.0 | 39.2--52.2<br>40.2--51.3 | 34.0--55.6<br>34.0--53.6 | 43.1--51.5<br>43.3--52.9 | 39.5--54.0<br>42.1--54.6 | 34.5--59.8<br>35.6--59.6 |
| 35 years | 41.8--49.2<br>41.5--47.4 | 39.1--52.2<br>40.3--50.8 | 33.9--55.5<br>34.3--54.4 | 43.0--51.3<br>41.7--47.8 | 39.3--53.8<br>39.2--48.8 | 34.4--59.1<br>37.5--50.0 |
| 36 years | 41.8--49.2<br>41.6--51.4 | 39.0--52.1<br>38.8--52.6 | 33.9--55.6<br>36.6--54.5 | 42.8--51.1<br>43.3--51.2 | 39.1--53.5<br>38.0--52.7 | 34.4--58.6<br>33.6--55.8 |
| 37 years | 41.9--49.1<br>36.1--47.7 | 39.0--52.1<br>31.5--49.2 | 33.9--55.6<br>29.1--53.0 | 42.6--50.9<br>45.7--52.4 | 39.0--53.3<br>41.7--53.8 | 34.3--58.0<br>33.1--54.8 |
| 38 years | 41.9--49.1<br>45.1--48.2 | 39.0--52.0<br>44.5--51.6 | 34.0--55.7<br>44.1--53.2 | 42.5--50.7<br>43.3--48.1 | 38.8--53.1<br>42.2--51.0 | 34.3--57.5<br>37.7--55.7 |



|          |                          |                          |                          |                          |                          |                          |
|----------|--------------------------|--------------------------|--------------------------|--------------------------|--------------------------|--------------------------|
| 39 years | 41.9--49.0<br>42.4--49.1 | 39.0--52.0<br>39.7--50.8 | 34.1--55.8<br>35.6--55.5 | 42.3--50.5<br>41.7--48.4 | 38.7--52.8<br>39.6--49.9 | 34.2--57.2<br>36.3--54.0 |
| 40 years | 41.9--49.0<br>40.6--48.9 | 38.9--52.0<br>37.6--53.5 | 34.3--55.9<br>36.1--58.7 | 42.1--50.2<br>45.4--50.7 | 38.5--52.6<br>38.6--52.4 | 34.0--57.0<br>36.1--54.0 |
| 41 years | 41.9--49.0<br>40.7--50.5 | 38.9--51.9<br>38.9--52.4 | 34.5--56.0<br>36.5--54.4 | 41.9--49.9<br>43.0--52.7 | 38.4--52.3<br>41.6--53.3 | 33.8--56.7<br>38.8--56.5 |
| 42 years | 41.9--49.0<br>42.6--47.8 | 38.9--51.8<br>42.4--49.7 | 34.5--56.0<br>42.0--50.9 | 41.8--49.6<br>40.1--49.9 | 38.3--52.1<br>38.5--52.5 | 33.5--56.5<br>32.2--54.4 |
| 43 years | 41.8--49.0<br>42.8--49.4 | 38.9--51.7<br>36.4--52.0 | 34.4--56.1<br>34.1--58.0 | 41.6--49.3<br>41.8--49.8 | 38.2--51.8<br>38.3--52.3 | 33.3--56.5<br>31.4--55.4 |
| 44 years | 41.7--49.0<br>40.1--48.2 | 38.8--51.6<br>38.0--49.1 | 34.3--56.2<br>31.0--52.0 | 41.4--49.0<br>41.3--49.7 | 38.0--51.6<br>38.1--51.5 | 33.2--56.5<br>35.1--56.6 |
| 45 years | 41.6--48.9<br>43.7--48.2 | 38.8--51.5<br>41.6--51.7 | 34.3--56.1<br>39.3--57.2 | 41.1--48.7<br>42.5--48.8 | 37.8--51.3<br>40.9--51.2 | 33.0--56.6<br>37.5--55.8 |
| 46 years | 41.5--48.9<br>43.2--49.1 | 38.8--51.4<br>40.6--50.5 | 34.3--56.1<br>37.0--52.5 | 40.9--48.5<br>40.2--47.1 | 37.6--51.1<br>38.3--50.6 | 32.8--56.6<br>36.3--55.1 |
| 47 years | 41.3--48.8<br>43.4--49.6 | 38.7--51.3<br>41.0--51.9 | 34.1--56.1<br>35.6--53.6 | 40.7--48.2<br>39.1--46.4 | 37.4--51.0<br>37.7--49.1 | 32.6--56.6<br>33.0--50.7 |
| 48 years | 41.2--48.8<br>40.6--46.5 | 38.6--51.3<br>37.9--49.6 | 34.0--56.1<br>33.8--54.5 | 40.5--48.0<br>41.6--47.3 | 37.3--50.8<br>41.1--49.6 | 32.4--56.6<br>38.6--57.5 |
| 49 years | 41.0--48.8<br>40.0--48.3 | 38.6--51.3<br>37.4--54.2 | 33.7--56.1<br>35.7--56.2 | 40.4--47.8<br>36.8--45.8 | 37.1--50.7<br>34.1--47.6 | 32.1--56.5<br>30.7--53.4 |
| 50 years | 40.9--48.7<br>41.6--49.9 | 38.5--51.2<br>39.7--52.7 | 33.5--56.0<br>35.0--56.1 | 40.3--47.7<br>39.1--46.8 | 36.9--50.7<br>36.3--48.5 | 31.9--56.5<br>30.0--50.9 |
| 51 years | 40.7--48.7<br>40.9--48.4 | 38.4--51.2<br>40.0--49.0 | 33.2--56.0<br>34.5--50.9 | 40.1--47.6<br>43.2--48.4 | 36.8--50.7<br>40.8--53.7 | 31.8--56.5<br>35.1--55.5 |
| 52 years | 40.6--48.6<br>40.7--48.8 | 38.3--51.2<br>37.0--50.0 | 32.9--56.0<br>33.3--51.1 | 40.0--47.6<br>44.8--49.7 | 36.7--50.7<br>39.5--53.7 | 31.7--56.6<br>31.0--57.1 |
| 53 years | 40.4--48.6<br>39.5--47.3 | 38.1--51.2<br>38.8--48.5 | 32.7--56.1<br>30.6--51.6 | 39.8--47.7<br>39.6--45.8 | 36.5--50.8<br>37.8--47.2 | 31.7--56.6<br>33.5--49.8 |
| 54 years | 40.2--48.6<br>40.1--45.5 | 38.0--51.2<br>36.2--46.8 | 32.6--56.1<br>32.2--53.3 | 39.7--47.8<br>37.0--45.6 | 36.4--50.9<br>33.2--52.5 | 31.6--56.7<br>31.8--59.6 |
| 55 years | 40.0--48.6<br>41.3--44.1 | 37.7--51.3<br>39.1--47.0 | 32.5--56.2<br>38.5--50.9 | 39.6--47.9<br>38.9--47.8 | 36.3--51.1<br>36.2--50.4 | 31.5--56.7<br>31.7--52.0 |
| 56 years | 39.8--48.6<br>41.0--51.1 | 37.4--51.3<br>39.7--53.5 | 32.3--56.2<br>37.7--56.1 | 39.6--48.0<br>39.6--47.0 | 36.2--51.3<br>33.0--51.3 | 31.5--56.7<br>31.4--54.4 |
| 57 years | 39.6--48.5<br>40.4--51.1 | 37.1--51.3<br>38.4--53.7 | 32.1--56.2<br>33.1--56.9 | 39.6--48.0<br>42.9--49.0 | 36.2--51.4<br>40.4--53.6 | 31.5--56.7<br>35.7--55.8 |
| 58 years | 39.4--48.4<br>42.3--52.6 | 36.8--51.2<br>38.3--56.4 | 31.9--56.1<br>36.0--62.6 | 39.5--48.1<br>40.1--49.5 | 36.1--51.4<br>39.1--51.3 | 31.5--56.9<br>36.3--56.1 |
| 59 years | 39.1--48.3<br>38.2--46.2 | 36.5--51.1<br>35.7--47.1 | 31.7--55.9<br>33.3--51.0 | 39.4--48.1<br>39.1--46.3 | 36.0--51.4<br>35.3--53.1 | 31.5--57.0<br>27.1--54.3 |
| 60 years | 38.9--48.1<br>39.5--47.6 | 36.2--50.9<br>37.3--48.7 | 31.4--55.8<br>34.5--52.0 | 39.4--48.1<br>45.6--51.4 | 35.9--51.4<br>41.1--53.1 | 31.5--57.1<br>36.6--56.1 |
| 61 years | 38.6--47.9<br>38.5--47.0 | 35.9--50.8<br>35.6--49.6 | 31.1--55.7<br>32.7--50.9 | 39.3--48.1<br>37.5--45.7 | 35.8--51.3<br>34.9--47.2 | 31.5--57.2<br>30.3--54.9 |
| 62 years | 38.4--47.9<br>44.9--51.4 | 35.6--50.7<br>44.4--55.7 | 30.9--55.7<br>41.7--63.2 | 39.1--48.0<br>42.5--50.6 | 35.6--51.1<br>38.8--53.8 | 31.4--57.2<br>35.3--59.7 |
| 63 years | 38.2--47.8<br>35.3--46.1 | 35.3--50.5<br>34.6--50.1 | 30.7--55.7<br>31.7--52.4 | 39.0--47.9<br>40.0--49.2 | 35.4--50.9<br>36.4--50.2 | 31.3--57.2<br>29.8--54.9 |

|            |                          |                          |                          |                          |                          |                          |
|------------|--------------------------|--------------------------|--------------------------|--------------------------|--------------------------|--------------------------|
| 64 years   | 38.0--47.7<br>36.4--46.5 | 35.1--50.3<br>33.6--48.9 | 30.6--55.7<br>31.7--52.5 | 38.8--47.8<br>40.2--48.9 | 35.3--50.6<br>34.2--51.0 | 31.2--57.0<br>32.4--60.6 |
| 65 years   | 37.8--47.5<br>36.6--46.4 | 34.9--50.2<br>34.6--48.2 | 30.3--55.7<br>33.6--50.0 | 38.6--47.7<br>39.2--44.5 | 35.1--50.4<br>36.0--48.6 | 31.1--57.0<br>33.3--52.7 |
| 66 years   | 37.7--47.4<br>39.9--45.5 | 34.8--50.2<br>31.9--48.3 | 30.1--55.7<br>29.8--51.1 | 38.3--47.5<br>40.6--46.5 | 34.9--50.1<br>40.1--47.5 | 31.0--57.0<br>32.5--48.6 |
| 67 years   | 37.6--47.3<br>36.4--46.8 | 34.8--50.2<br>33.8--49.4 | 29.9--55.8<br>27.8--52.9 | 38.1--47.3<br>37.2--46.3 | 34.7--49.8<br>34.6--48.8 | 30.9--56.9<br>33.1--55.0 |
| 68 years   | 37.6--47.4<br>37.7--45.4 | 34.9--50.3<br>36.1--46.6 | 29.8--55.9<br>33.2--52.1 | 37.8--47.1<br>35.2--46.0 | 34.5--49.5<br>34.0--49.1 | 30.8--56.7<br>32.9--57.5 |
| 69 years   | 37.5--47.5<br>37.5--48.3 | 34.9--50.4<br>36.0--54.1 | 29.7--56.1<br>31.6--55.2 | 37.5--46.9<br>38.9--47.2 | 34.3--49.3<br>35.2--48.5 | 30.6--56.6<br>29.5--49.7 |
| 70 years   | 37.5--47.7<br>34.3--43.6 | 35.1--50.6<br>31.9--45.7 | 29.6--56.5<br>30.0--48.1 | 37.3--46.6<br>40.3--48.3 | 34.2--49.1<br>35.5--49.9 | 30.5--56.4<br>33.9--54.0 |
| 71 years   | 37.5--47.8<br>40.1--49.9 | 35.1--50.7<br>37.8--57.7 | 29.6--56.7<br>37.7--60.1 | 37.2--46.4<br>36.4--47.0 | 34.2--49.0<br>33.3--47.6 | 30.5--56.0<br>30.9--55.0 |
| 72 years   | 37.5--47.9<br>40.8--49.0 | 35.1--50.8<br>37.1--55.7 | 29.6--56.8<br>36.2--66.4 | 37.0--46.0<br>35.5--46.0 | 34.1--48.9<br>34.2--46.7 | 30.6--55.7<br>31.3--48.8 |
| 73 years   | 37.4--48.0<br>36.9--44.4 | 35.1--51.0<br>34.6--49.3 | 29.7--56.9<br>30.5--50.8 | 36.9--45.8<br>37.6--41.6 | 34.1--48.8<br>35.6--45.4 | 30.6--55.5<br>34.2--49.9 |
| 74 years   | 37.4--48.0<br>44.4--47.9 | 35.2--51.2<br>37.5--48.4 | 29.9--56.9<br>32.0--48.8 | 37.0--45.6<br>37.2--40.6 | 34.2--48.7<br>31.7--43.1 | 30.9--55.3<br>27.3--45.2 |
| 75 years   | 37.4--47.9<br>39.3--47.7 | 35.2--51.4<br>37.1--51.5 | 30.1--56.9<br>30.9--52.3 | 37.1--45.3<br>40.5--53.0 | 34.4--48.6<br>37.2--55.9 | 31.2--54.7<br>34.5--58.3 |
| 76 years   | 37.4--47.7<br>39.3--48.9 | 35.2--51.4<br>37.1--51.7 | 30.4--56.8<br>35.9--53.6 | 37.3--45.2<br>35.6--42.1 | 34.7--48.5<br>34.7--44.8 | 31.5--54.3<br>34.0--48.1 |
| 77 years   | 37.3--47.5<br>43.9--52.0 | 35.2--51.3<br>41.9--54.1 | 30.6--56.7<br>40.3--55.7 | 37.4--45.1<br>40.2--42.7 | 34.7--48.4<br>40.2--43.2 | 31.8--53.7<br>40.2--43.6 |
| 78 years   | 37.2--47.3<br>37.1--47.0 | 35.2--51.0<br>36.9--51.8 | 30.9--56.3<br>36.9--55.7 | 37.4--45.1<br>42.0--43.8 | 34.7--48.3<br>41.6--44.3 | 32.1--53.1<br>41.3--44.7 |
| 79 years   | 37.1--47.0<br>34.6--39.0 | 35.2--50.6<br>33.8--44.0 | 31.1--55.9<br>33.1--48.0 | 37.4--45.1<br>40.2--40.2 | 34.8--48.3<br>40.2--40.2 | 32.3--52.6<br>40.2--40.2 |
| 80 years   | 37.1--46.6<br>37.0--44.8 | 35.1--50.2<br>34.3--46.1 | 31.5--55.6<br>32.4--52.3 | 37.3--45.0<br>36.3--46.5 | 34.8--48.1<br>34.3--48.1 | 32.6--52.1<br>33.4--49.9 |
| > 80 years | N/A                      | N/A                      | N/A                      | N/A                      | N/A                      | N/A                      |

Table S7. Age norm lookup table for spindle density (/ minute) during N2 at central channel. In each cell, the first row is from smoothed value, the second row is from unsmoothed value (actual data). 5 to 11 months and > 80 years are not applicable since they are not present in the dataset.

| Age            | Male 50% range | Male 75% range | Male 95% range | Female 50% range | Female 75% range | Female 95% range |
|----------------|----------------|----------------|----------------|------------------|------------------|------------------|
| 0.5 months     | 1.2--2.0       | 0.8--2.1       | 0.5--2.5       | 1.2--2.0         | 0.8--2.1         | 0.5--2.5         |
|                | 1.2--2.0       | 0.9--2.2       | 0.6--2.6       | 1.2--2.0         | 0.9--2.2         | 0.6--2.6         |
| 1 months       | 1.1--1.9       | 0.8--2.1       | 0.4--2.5       | 1.1--1.9         | 0.8--2.1         | 0.4--2.5         |
|                | 1.2--1.9       | 0.8--2.1       | 0.3--2.4       | 1.2--1.9         | 0.8--2.1         | 0.3--2.4         |
| 1.5 months     | 1.1--1.9       | 0.8--2.0       | 0.4--2.4       | 1.1--1.9         | 0.8--2.0         | 0.4--2.4         |
|                | 1.1--1.8       | 0.8--2.0       | 0.5--2.3       | 1.1--1.8         | 0.8--2.0         | 0.5--2.3         |
| 2 months       | 1.1--1.8       | 0.8--2.0       | 0.5--2.3       | 1.1--1.8         | 0.8--2.0         | 0.5--2.3         |
|                | 1.0--1.8       | 0.8--2.0       | 0.6--2.2       | 1.0--1.8         | 0.8--2.0         | 0.6--2.2         |
| 2.5 months     | 1.1--1.7       | 0.8--2.0       | 0.5--2.2       | 1.1--1.7         | 0.8--2.0         | 0.5--2.2         |
|                | 1.0--1.7       | 0.7--1.9       | 0.5--2.1       | 1.0--1.7         | 0.7--1.9         | 0.5--2.1         |
| 3 months       | 1.0--1.7       | 0.7--2.0       | 0.5--2.2       | 1.0--1.7         | 0.8--2.0         | 0.5--2.2         |
|                | 1.2--1.7       | 0.8--2.0       | 0.6--2.2       | 1.2--1.7         | 0.8--2.0         | 0.6--2.2         |
| 3.5 months     | 1.0--1.7       | 0.7--2.0       | 0.5--2.2       | 1.0--1.7         | 0.7--2.0         | 0.5--2.2         |
|                | 1.3--1.8       | 1.2--2.0       | 1.2--2.2       | 1.3--1.8         | 1.2--2.0         | 1.2--2.2         |
| 4 months       | 1.0--1.7       | 0.7--2.0       | 0.5--2.2       | 1.0--1.7         | 0.7--2.0         | 0.5--2.2         |
|                | 1.7--2.5       | 1.2--2.5       | 1.2--2.6       | 1.7--2.5         | 1.2--2.5         | 1.2--2.6         |
| 5 to 11 months | N/A            | N/A            | N/A            | N/A              | N/A              | N/A              |
| 1 years        | 1.0--1.7       | 0.2--2.0       | 0.1--2.4       | 0.6--1.8         | 0.3--2.1         | 0.0--2.4         |
|                | 1.0--1.7       | 0.2--1.8       | 0.1--2.5       | 0.7--1.8         | 0.4--2.3         | 0.2--2.6         |
| 2 years        | 0.9--1.8       | 0.2--2.1       | 0.0--2.5       | 0.7--2.0         | 0.2--2.3         | 0.0--2.7         |
|                | 0.8--1.6       | 0.1--1.7       | 0.0--2.0       | 0.3--1.4         | 0.1--1.9         | 0.1--2.2         |
| 3 years        | 0.9--1.9       | 0.2--2.2       | 0.0--2.7       | 0.8--2.1         | 0.2--2.5         | 0.0--3.0         |
|                | 1.1--1.8       | 0.3--2.0       | 0.0--2.5       | 1.0--2.1         | 0.4--2.2         | 0.0--2.3         |
| 4 years        | 0.9--2.0       | 0.2--2.3       | 0.0--2.9       | 0.9--2.3         | 0.2--2.7         | 0.0--3.1         |
|                | 1.3--2.1       | 0.6--2.2       | 0.2--2.6       | 0.7--2.1         | 0.2--2.4         | 0.0--2.5         |
| 5 years        | 0.9--2.1       | 0.2--2.4       | 0.0--3.0       | 1.0--2.4         | 0.3--2.8         | 0.0--3.2         |
|                | 1.2--2.2       | 0.2--2.4       | 0.1--2.6       | 1.1--2.7         | 0.2--2.9         | 0.0--3.2         |
| 6 years        | 0.9--2.2       | 0.2--2.6       | 0.0--3.2       | 1.2--2.6         | 0.4--2.9         | 0.0--3.3         |
|                | 0.6--2.2       | 0.1--2.5       | 0.0--3.1       | 1.1--2.8         | 0.2--3.0         | 0.0--3.3         |
| 7 years        | 1.0--2.4       | 0.2--2.7       | 0.0--3.3       | 1.3--2.7         | 0.5--3.0         | 0.0--3.4         |
|                | 0.6--2.4       | 0.1--2.8       | 0.0--3.1       | 1.4--2.8         | 0.9--3.0         | 0.1--3.3         |
| 8 years        | 1.1--2.5       | 0.2--2.9       | 0.0--3.4       | 1.4--2.8         | 0.6--3.0         | 0.0--3.5         |
|                | 1.2--2.5       | 0.5--2.9       | 0.1--3.1       | 1.8--2.9         | 0.8--3.0         | 0.0--3.4         |
| 9 years        | 1.2--2.7       | 0.2--3.0       | 0.0--3.5       | 1.6--2.9         | 0.6--3.1         | 0.0--3.6         |
|                | 1.7--2.9       | 0.4--3.1       | 0.1--3.5       | 1.7--3.0         | 0.8--3.1         | 0.0--3.5         |
| 10 years       | 1.3--2.8       | 0.2--3.1       | 0.1--3.6       | 1.7--3.0         | 0.6--3.2         | 0.0--3.7         |
|                | 1.7--2.9       | 0.4--3.2       | 0.1--3.5       | 1.8--2.9         | 1.1--3.1         | 0.3--3.5         |
| 11 years       | 1.3--3.0       | 0.2--3.3       | 0.1--3.7       | 1.8--3.1         | 0.6--3.3         | 0.0--3.8         |
|                | 1.3--2.8       | 0.3--3.2       | 0.0--3.8       | 1.5--3.0         | 0.5--3.2         | 0.3--3.5         |
| 12 years       | 1.4--3.1       | 0.2--3.4       | 0.1--3.8       | 1.9--3.2         | 0.7--3.5         | -0.0--3.9        |
|                | 1.3--3.3       | 0.2--3.7       | 0.0--3.9       | 2.1--3.0         | 1.6--3.1         | 0.3--3.5         |
| 13 years       | 1.5--3.2       | 0.3--3.5       | 0.2--3.8       | 1.9--3.3         | 0.9--3.7         | -0.0--4.0        |
|                | 1.1--3.2       | 0.2--3.6       | 0.1--3.9       | 2.0--3.1         | 0.4--3.6         | 0.0--3.9         |
| 14 years       | 1.6--3.3       | 0.4--3.6       | 0.2--3.9       | 2.0--3.4         | 1.2--3.8         | 0.1--4.1         |

|          |                      |                      |                      |                      |                      |                      |
|----------|----------------------|----------------------|----------------------|----------------------|----------------------|----------------------|
|          | 1.3--3.0             | 0.3--3.5             | 0.1--3.8             | 1.6--3.5             | 0.4--3.8             | 0.0--3.9             |
| 15 years | 1.8--3.3<br>2.4--3.4 | 0.7--3.7<br>1.5--3.5 | 0.2--4.0<br>0.3--3.9 | 2.1--3.5<br>2.8--3.6 | 1.6--3.9<br>2.1--3.7 | 0.2--4.3<br>1.6--4.0 |
| 16 years | 1.9--3.4<br>1.7--3.4 | 1.0--3.7<br>0.9--3.5 | 0.3--4.0<br>0.2--3.8 | 2.1--3.5<br>3.0--3.5 | 1.7--3.9<br>2.6--3.7 | 0.6--4.4<br>1.7--4.0 |
| 17 years | 2.1--3.4<br>2.6--3.5 | 1.3--3.8<br>1.9--3.6 | 0.3--4.1<br>0.7--3.8 | 2.1--3.5<br>2.3--3.8 | 1.6--3.9<br>2.1--4.4 | 0.9--4.5<br>1.9--4.6 |
| 18 years | 2.1--3.4<br>2.5--3.5 | 1.4--3.8<br>1.7--4.0 | 0.4--4.1<br>1.2--4.0 | 2.2--3.6<br>2.2--3.9 | 1.6--3.9<br>1.7--4.0 | 1.1--4.6<br>0.9--4.6 |
| 19 years | 2.1--3.5<br>2.7--3.5 | 1.5--3.9<br>2.2--3.7 | 0.5--4.1<br>1.7--3.9 | 2.2--3.6<br>2.7--3.9 | 1.5--3.9<br>1.5--4.0 | 1.1--4.6<br>0.9--4.4 |
| 20 years | 2.2--3.5<br>1.9--3.4 | 1.5--3.9<br>1.1--3.8 | 0.5--4.2<br>0.7--3.9 | 2.2--3.6<br>2.3--3.6 | 1.5--3.9<br>1.5--3.9 | 1.0--4.5<br>0.8--4.1 |
| 21 years | 2.2--3.5<br>1.9--3.2 | 1.5--3.9<br>1.2--3.7 | 0.5--4.2<br>0.7--3.9 | 2.2--3.6<br>1.8--3.2 | 1.5--3.9<br>1.5--3.6 | 1.0--4.4<br>0.7--3.8 |
| 22 years | 2.2--3.5<br>2.4--3.6 | 1.5--4.0<br>1.4--3.8 | 0.6--4.2<br>0.7--3.9 | 2.2--3.6<br>1.7--3.2 | 1.5--3.9<br>1.5--3.4 | 1.0--4.3<br>1.3--4.1 |
| 23 years | 2.2--3.5<br>2.2--3.1 | 1.6--4.0<br>1.4--3.2 | 0.6--4.2<br>0.5--3.9 | 2.2--3.6<br>1.8--3.4 | 1.5--3.9<br>1.6--3.6 | 1.1--4.2<br>1.3--4.2 |
| 24 years | 2.2--3.5<br>2.1--3.2 | 1.6--4.0<br>1.5--3.5 | 0.6--4.2<br>0.7--4.2 | 2.2--3.6<br>2.0--3.6 | 1.5--3.8<br>1.4--3.8 | 1.0--4.1<br>1.0--3.9 |
| 25 years | 2.1--3.5<br>2.2--3.7 | 1.6--3.9<br>1.6--3.8 | 0.7--4.2<br>1.0--4.3 | 2.2--3.5<br>1.7--3.5 | 1.5--3.8<br>1.2--3.8 | 1.0--4.1<br>1.0--4.0 |
| 26 years | 2.1--3.5<br>2.3--3.5 | 1.6--3.9<br>1.7--3.8 | 0.7--4.2<br>0.9--4.2 | 2.2--3.5<br>2.1--3.4 | 1.5--3.8<br>1.6--3.7 | 1.0--4.1<br>1.0--4.1 |
| 27 years | 2.1--3.5<br>2.2--3.5 | 1.5--3.9<br>1.6--3.9 | 0.7--4.2<br>1.2--4.3 | 2.1--3.5<br>2.4--3.4 | 1.5--3.8<br>1.7--3.7 | 0.9--4.1<br>1.0--4.1 |
| 28 years | 2.1--3.4<br>2.1--3.6 | 1.5--3.8<br>1.7--3.9 | 0.7--4.1<br>1.4--4.2 | 2.1--3.5<br>2.4--3.3 | 1.5--3.7<br>2.1--3.6 | 0.9--4.1<br>1.1--4.1 |
| 29 years | 2.1--3.4<br>2.1--3.5 | 1.5--3.8<br>1.8--3.7 | 0.7--4.1<br>1.2--4.0 | 2.1--3.4<br>2.5--3.4 | 1.5--3.7<br>1.8--3.6 | 0.8--4.1<br>0.8--3.9 |
| 30 years | 2.0--3.4<br>2.1--3.3 | 1.5--3.7<br>1.8--3.8 | 0.7--4.1<br>0.4--4.2 | 2.1--3.4<br>2.3--3.4 | 1.5--3.7<br>1.5--3.8 | 0.8--4.1<br>0.8--4.2 |
| 31 years | 2.0--3.4<br>2.3--3.3 | 1.5--3.7<br>1.9--3.8 | 0.7--4.1<br>1.1--4.2 | 2.0--3.4<br>2.0--3.2 | 1.6--3.7<br>1.4--3.8 | 0.7--4.1<br>0.6--4.6 |
| 32 years | 2.0--3.3<br>2.4--3.3 | 1.4--3.6<br>1.7--3.5 | 0.7--4.0<br>0.8--3.9 | 2.0--3.4<br>2.0--3.1 | 1.6--3.6<br>1.3--3.3 | 0.7--4.1<br>0.5--3.8 |
| 33 years | 2.0--3.3<br>1.5--2.8 | 1.4--3.6<br>0.9--3.4 | 0.6--4.0<br>0.2--3.7 | 2.0--3.3<br>2.2--3.3 | 1.5--3.6<br>1.9--3.9 | 0.7--4.1<br>1.2--4.3 |
| 34 years | 1.9--3.3<br>1.2--2.7 | 1.4--3.6<br>1.1--3.4 | 0.6--4.0<br>0.5--3.7 | 2.0--3.3<br>2.2--3.6 | 1.5--3.6<br>1.9--3.9 | 0.6--4.1<br>1.2--4.3 |
| 35 years | 1.9--3.3<br>1.8--3.0 | 1.4--3.5<br>1.4--3.5 | 0.6--4.0<br>1.1--3.7 | 2.0--3.3<br>2.0--3.6 | 1.5--3.6<br>1.5--3.7 | 0.6--4.1<br>0.9--3.9 |
| 36 years | 1.9--3.2<br>2.2--3.3 | 1.3--3.5<br>1.8--3.7 | 0.6--3.9<br>1.5--4.0 | 1.9--3.3<br>1.9--3.2 | 1.5--3.6<br>1.8--3.5 | 0.6--4.1<br>1.0--4.1 |
| 37 years | 1.8--3.2<br>1.9--3.2 | 1.3--3.5<br>1.4--3.7 | 0.6--3.9<br>0.4--3.9 | 1.9--3.3<br>1.8--3.1 | 1.5--3.6<br>1.8--3.5 | 0.5--4.1<br>1.0--3.9 |
| 38 years | 1.8--3.2<br>1.6--3.1 | 1.3--3.4<br>1.2--3.7 | 0.6--3.9<br>0.3--4.1 | 1.9--3.2<br>1.8--3.1 | 1.5--3.6<br>1.5--3.6 | 0.5--4.1<br>0.8--3.9 |

|          |                      |                      |                      |                      |                      |                      |
|----------|----------------------|----------------------|----------------------|----------------------|----------------------|----------------------|
| 39 years | 1.8--3.1<br>1.9--3.2 | 1.3--3.4<br>1.6--3.7 | 0.5--3.9<br>0.4--4.1 | 1.9--3.2<br>1.8--3.3 | 1.4--3.5<br>1.1--3.5 | 0.5--4.1<br>0.5--3.7 |
| 40 years | 1.8--3.1<br>1.7--3.1 | 1.3--3.4<br>1.2--3.3 | 0.5--3.9<br>0.9--3.7 | 1.9--3.2<br>1.9--3.1 | 1.4--3.5<br>1.5--3.4 | 0.5--4.1<br>0.5--3.6 |
| 41 years | 1.7--3.1<br>1.8--3.0 | 1.2--3.4<br>1.3--3.2 | 0.5--3.9<br>0.9--3.6 | 1.9--3.2<br>1.9--3.1 | 1.4--3.5<br>1.6--3.2 | 0.5--4.1<br>0.5--4.0 |
| 42 years | 1.7--3.0<br>2.1--3.1 | 1.2--3.3<br>1.8--3.3 | 0.5--3.8<br>0.8--3.6 | 1.9--3.2<br>1.7--3.1 | 1.3--3.5<br>1.1--3.3 | 0.5--4.1<br>0.5--3.9 |
| 43 years | 1.7--3.0<br>1.9--3.3 | 1.2--3.3<br>1.4--3.5 | 0.5--3.8<br>0.6--3.9 | 1.8--3.1<br>1.5--3.1 | 1.3--3.5<br>0.6--3.3 | 0.5--4.1<br>0.3--3.8 |
| 44 years | 1.7--2.9<br>1.6--3.3 | 1.2--3.3<br>1.0--3.5 | 0.5--3.8<br>0.5--3.9 | 1.8--3.1<br>1.8--3.1 | 1.2--3.5<br>1.4--3.5 | 0.5--4.0<br>0.4--4.1 |
| 45 years | 1.6--2.9<br>1.4--3.0 | 1.1--3.3<br>0.9--3.2 | 0.5--3.8<br>0.3--3.4 | 1.8--3.1<br>1.8--3.2 | 1.2--3.5<br>1.5--3.6 | 0.5--4.0<br>0.8--3.9 |
| 46 years | 1.6--2.9<br>1.7--2.8 | 1.1--3.3<br>1.0--3.2 | 0.5--3.8<br>0.7--3.7 | 1.8--3.1<br>1.7--3.3 | 1.1--3.5<br>1.2--3.6 | 0.5--4.0<br>0.4--4.1 |
| 47 years | 1.6--2.8<br>1.7--2.8 | 1.1--3.3<br>1.0--3.1 | 0.5--3.8<br>0.5--3.7 | 1.8--3.1<br>1.6--3.1 | 1.1--3.5<br>0.9--3.4 | 0.5--4.0<br>0.3--4.1 |
| 48 years | 1.6--2.8<br>1.5--2.6 | 1.1--3.3<br>0.9--3.1 | 0.5--3.8<br>0.4--3.6 | 1.8--3.1<br>1.7--3.0 | 1.1--3.5<br>0.8--3.4 | 0.5--4.0<br>0.4--3.8 |
| 49 years | 1.5--2.8<br>1.5--2.6 | 1.1--3.2<br>1.2--3.4 | 0.5--3.8<br>0.7--3.7 | 1.8--3.0<br>1.6--2.9 | 1.1--3.5<br>1.0--3.5 | 0.5--4.0<br>0.4--4.2 |
| 50 years | 1.5--2.7<br>1.5--2.4 | 1.0--3.2<br>1.2--3.3 | 0.5--3.7<br>0.8--3.7 | 1.7--3.0<br>1.7--3.0 | 1.1--3.5<br>1.3--3.2 | 0.5--4.0<br>0.4--4.0 |
| 51 years | 1.5--2.7<br>1.5--2.6 | 1.0--3.2<br>1.2--3.0 | 0.5--3.7<br>0.7--3.7 | 1.7--3.0<br>1.9--3.0 | 1.1--3.4<br>1.6--3.2 | 0.5--3.9<br>0.7--3.5 |
| 52 years | 1.4--2.6<br>1.3--2.9 | 1.0--3.2<br>0.7--2.9 | 0.5--3.7<br>0.3--3.3 | 1.7--3.0<br>1.7--3.0 | 1.1--3.4<br>1.4--3.4 | 0.5--3.9<br>0.7--3.9 |
| 53 years | 1.4--2.6<br>1.3--2.5 | 1.0--3.2<br>0.7--2.9 | 0.4--3.7<br>0.3--3.5 | 1.7--3.1<br>1.6--3.0 | 1.2--3.4<br>1.3--3.4 | 0.5--3.9<br>0.3--4.0 |
| 54 years | 1.4--2.6<br>1.5--2.4 | 1.0--3.1<br>1.2--3.3 | 0.4--3.7<br>0.6--4.1 | 1.7--3.1<br>1.6--2.7 | 1.2--3.4<br>1.1--3.3 | 0.5--3.9<br>0.3--4.3 |
| 55 years | 1.4--2.6<br>1.6--3.0 | 0.9--3.1<br>1.3--3.6 | 0.4--3.7<br>0.6--4.1 | 1.7--3.1<br>1.9--2.9 | 1.2--3.4<br>1.6--3.5 | 0.5--3.9<br>0.8--4.1 |
| 56 years | 1.3--2.5<br>1.3--2.5 | 0.9--3.1<br>0.8--3.1 | 0.4--3.7<br>0.6--3.9 | 1.6--3.1<br>1.9--3.2 | 1.3--3.3<br>1.5--3.5 | 0.5--3.9<br>1.1--4.0 |
| 57 years | 1.3--2.5<br>1.2--2.3 | 0.9--3.1<br>1.0--2.7 | 0.4--3.6<br>0.8--3.2 | 1.6--3.1<br>1.8--3.1 | 1.3--3.3<br>1.2--3.3 | 0.5--3.9<br>0.7--3.7 |
| 58 years | 1.3--2.5<br>1.6--2.4 | 0.9--3.0<br>1.0--2.8 | 0.4--3.6<br>0.9--3.4 | 1.6--3.0<br>1.9--3.1 | 1.3--3.3<br>1.1--3.4 | 0.5--3.9<br>0.7--3.7 |
| 59 years | 1.3--2.5<br>1.6--2.5 | 0.9--3.0<br>1.1--3.3 | 0.4--3.6<br>0.7--3.5 | 1.6--3.0<br>1.7--3.2 | 1.3--3.3<br>1.0--3.4 | 0.5--3.9<br>0.4--3.6 |
| 60 years | 1.2--2.4<br>1.4--2.9 | 0.8--2.9<br>1.0--3.2 | 0.4--3.6<br>0.5--3.4 | 1.5--3.0<br>1.5--3.3 | 1.3--3.2<br>1.2--3.4 | 0.5--3.9<br>0.3--3.9 |
| 61 years | 1.2--2.4<br>1.4--2.6 | 0.8--2.9<br>0.9--2.9 | 0.4--3.6<br>0.6--3.2 | 1.5--2.9<br>1.7--3.1 | 1.2--3.2<br>1.3--3.3 | 0.5--3.9<br>0.7--3.8 |
| 62 years | 1.2--2.4<br>0.8--2.1 | 0.8--2.9<br>0.5--2.4 | 0.4--3.5<br>0.3--2.6 | 1.5--2.9<br>1.5--2.5 | 1.2--3.2<br>1.1--3.2 | 0.5--3.9<br>0.7--3.7 |
| 63 years | 1.2--2.4<br>0.8--2.1 | 0.8--2.8<br>0.5--2.6 | 0.4--3.5<br>0.2--3.0 | 1.5--2.8<br>1.4--2.4 | 1.2--3.1<br>1.2--3.1 | 0.5--3.9<br>0.9--4.0 |

|            |          |          |          |          |          |          |
|------------|----------|----------|----------|----------|----------|----------|
| 64 years   | 1.1--2.4 | 0.8--2.8 | 0.4--3.5 | 1.4--2.7 | 1.1--3.1 | 0.5--3.9 |
|            | 1.1--2.4 | 0.8--2.7 | 0.3--3.4 | 1.3--2.2 | 1.1--2.7 | 0.9--3.2 |
| 65 years   | 1.1--2.4 | 0.7--2.7 | 0.4--3.5 | 1.4--2.6 | 1.0--3.0 | 0.5--3.9 |
|            | 1.1--2.3 | 0.8--2.7 | 0.5--3.4 | 1.3--2.2 | 1.0--2.5 | 0.7--2.9 |
| 66 years   | 1.1--2.4 | 0.7--2.7 | 0.4--3.5 | 1.4--2.6 | 1.0--3.0 | 0.5--3.9 |
|            | 0.9--2.2 | 0.6--2.6 | 0.1--3.5 | 1.5--2.5 | 1.2--2.8 | 0.5--3.7 |
| 67 years   | 1.1--2.4 | 0.7--2.6 | 0.3--3.4 | 1.3--2.5 | 0.9--3.0 | 0.4--3.9 |
|            | 0.9--2.2 | 0.3--2.9 | 0.0--3.5 | 1.7--2.7 | 1.2--2.8 | 1.0--3.9 |
| 68 years   | 1.0--2.4 | 0.7--2.6 | 0.3--3.4 | 1.3--2.5 | 0.9--2.9 | 0.4--3.9 |
|            | 0.9--2.0 | 0.5--2.5 | 0.1--3.4 | 1.3--2.4 | 1.1--2.7 | 0.8--4.1 |
| 69 years   | 1.0--2.3 | 0.7--2.6 | 0.3--3.4 | 1.3--2.4 | 0.8--2.9 | 0.4--3.8 |
|            | 1.0--1.9 | 0.6--2.5 | 0.3--2.7 | 1.2--2.4 | 0.7--2.5 | 0.3--3.4 |
| 70 years   | 1.0--2.3 | 0.7--2.6 | 0.3--3.4 | 1.2--2.4 | 0.8--2.8 | 0.4--3.7 |
|            | 0.8--2.0 | 0.7--2.4 | 0.6--3.5 | 0.9--2.4 | 0.6--2.6 | 0.3--3.5 |
| 71 years   | 0.9--2.3 | 0.7--2.6 | 0.3--3.4 | 1.2--2.3 | 0.8--2.8 | 0.4--3.7 |
|            | 0.8--1.7 | 0.6--2.1 | 0.4--3.5 | 0.9--2.4 | 0.6--2.8 | 0.5--3.7 |
| 72 years   | 0.9--2.3 | 0.6--2.7 | 0.3--3.4 | 1.2--2.3 | 0.8--2.7 | 0.4--3.6 |
|            | 1.4--2.0 | 0.6--2.4 | 0.4--2.7 | 0.8--2.1 | 0.5--2.8 | 0.3--3.3 |
| 73 years   | 0.9--2.3 | 0.6--2.7 | 0.3--3.4 | 1.1--2.2 | 0.7--2.7 | 0.4--3.5 |
|            | 1.2--2.4 | 0.6--2.8 | 0.3--3.5 | 0.8--2.0 | 0.7--2.6 | 0.2--3.0 |
| 74 years   | 0.9--2.3 | 0.6--2.7 | 0.3--3.5 | 1.1--2.2 | 0.7--2.6 | 0.4--3.4 |
|            | 1.0--2.5 | 0.6--2.9 | 0.3--3.6 | 0.9--2.1 | 0.8--3.0 | 0.7--3.5 |
| 75 years   | 0.8--2.3 | 0.6--2.7 | 0.3--3.5 | 1.0--2.1 | 0.7--2.5 | 0.4--3.3 |
|            | 1.1--2.5 | 1.0--2.7 | 0.7--3.1 | 0.9--1.7 | 0.6--2.4 | 0.5--3.5 |
| 76 years   | 0.8--2.2 | 0.6--2.8 | 0.2--3.5 | 1.0--2.1 | 0.7--2.5 | 0.4--3.2 |
|            | 1.6--2.5 | 1.0--2.8 | 0.6--3.4 | 1.1--2.2 | 0.7--2.2 | 0.5--2.6 |
| 77 years   | 0.8--2.2 | 0.6--2.7 | 0.2--3.5 | 1.0--2.1 | 0.7--2.4 | 0.4--3.1 |
|            | 1.5--3.1 | 1.0--3.5 | 0.6--3.5 | 1.0--2.2 | 0.9--2.3 | 0.9--2.6 |
| 78 years   | 0.8--2.1 | 0.6--2.7 | 0.2--3.5 | 0.9--2.1 | 0.7--2.3 | 0.4--2.9 |
|            | 1.0--2.5 | 0.9--3.0 | 0.5--3.3 | 0.9--1.8 | 0.9--1.9 | 0.9--2.1 |
| 79 years   | 0.7--2.0 | 0.5--2.6 | 0.2--3.4 | 0.9--2.0 | 0.7--2.3 | 0.4--2.8 |
|            | 0.9--1.3 | 0.6--1.9 | 0.4--2.8 | 1.9--2.0 | 1.8--2.1 | 1.8--2.1 |
| 80 years   | 0.7--1.9 | 0.5--2.5 | 0.2--3.2 | 0.8--2.0 | 0.7--2.2 | 0.4--2.7 |
|            | 0.6--1.1 | 0.5--1.5 | 0.1--2.4 | 0.9--2.1 | 0.6--2.3 | 0.2--2.7 |
| > 80 years | N/A      | N/A      | N/A      | N/A      | N/A      | N/A      |

Table S8. Age norm lookup table for spindle density (/ minute) during N2 at frontal channel. In each cell, the first row is from smoothed value, the second row is from unsmoothed value (actual data). < 13 years and > 80 years are not applicable since they are not present in the dataset.

| Age        | Male 50% range       | Male 75% range       | Male 95% range       | Female 50% range     | Female 75% range     | Female 95% range     |
|------------|----------------------|----------------------|----------------------|----------------------|----------------------|----------------------|
| < 13 years | N/A                  | N/A                  | N/A                  | N/A                  | N/A                  | N/A                  |
| 13 years   | 2.3--3.8<br>2.6--3.3 | 1.9--4.3<br>2.4--3.6 | 0.6--4.7<br>2.3--3.9 | 2.6--3.9<br>3.3--3.6 | 2.2--4.2<br>3.2--3.8 | 1.5--5.1<br>3.1--4.0 |
| 14 years   | 2.3--3.8<br>3.1--3.9 | 1.9--4.3<br>3.0--4.2 | 0.6--4.7<br>3.0--4.3 | 2.6--3.9<br>3.8--4.0 | 2.2--4.2<br>3.7--4.1 | 1.5--5.1<br>3.6--4.2 |
| 15 years   | 2.3--3.7<br>2.9--4.0 | 1.9--4.2<br>2.5--4.2 | 0.6--4.7<br>1.1--4.3 | 2.6--3.9<br>2.9--4.2 | 2.1--4.2<br>2.5--4.3 | 1.5--5.1<br>2.1--4.4 |
| 16 years   | 2.3--3.7<br>2.5--3.9 | 1.9--4.2<br>1.7--4.2 | 0.6--4.7<br>0.2--4.3 | 2.6--3.8<br>2.7--4.1 | 2.1--4.2<br>2.5--4.2 | 1.5--5.1<br>2.1--4.4 |
| 17 years   | 2.3--3.7<br>2.2--3.6 | 1.8--4.2<br>1.7--3.8 | 0.7--4.7<br>0.7--4.2 | 2.6--3.8<br>2.7--3.5 | 2.0--4.2<br>2.4--3.9 | 1.5--5.1<br>2.1--5.2 |
| 18 years   | 2.3--3.7<br>2.1--3.8 | 1.8--4.2<br>1.5--4.3 | 0.7--4.7<br>1.1--4.7 | 2.5--3.8<br>2.4--3.6 | 1.9--4.2<br>2.3--4.0 | 1.4--5.0<br>2.1--5.0 |
| 19 years   | 2.3--3.6<br>2.2--3.7 | 1.8--4.1<br>1.6--4.3 | 0.8--4.7<br>1.1--4.7 | 2.5--3.8<br>2.7--4.0 | 1.9--4.2<br>2.4--4.4 | 1.3--5.0<br>2.3--5.4 |
| 20 years   | 2.3--3.6<br>3.0--3.6 | 1.8--4.1<br>2.7--4.3 | 0.8--4.7<br>2.0--4.9 | 2.5--3.7<br>2.9--4.2 | 1.8--4.2<br>1.8--4.9 | 1.2--5.0<br>1.1--5.3 |
| 21 years   | 2.3--3.6<br>1.9--3.3 | 1.8--4.1<br>1.1--4.1 | 0.9--4.7<br>0.7--4.9 | 2.4--3.7<br>2.3--3.6 | 1.8--4.1<br>1.5--4.2 | 1.2--5.0<br>0.8--4.8 |
| 22 years   | 2.2--3.5<br>2.0--3.1 | 1.7--4.0<br>1.4--3.6 | 0.9--4.7<br>0.8--5.0 | 2.4--3.7<br>2.2--3.5 | 1.7--4.1<br>1.4--3.6 | 1.1--4.9<br>1.0--4.0 |
| 23 years   | 2.2--3.5<br>2.3--3.1 | 1.7--4.0<br>2.2--4.1 | 0.9--4.7<br>1.6--5.2 | 2.4--3.6<br>1.7--3.5 | 1.7--4.1<br>1.4--3.6 | 1.1--4.8<br>1.2--4.0 |
| 24 years   | 2.2--3.5<br>2.3--3.4 | 1.7--3.9<br>1.5--3.5 | 0.9--4.6<br>1.3--3.9 | 2.3--3.6<br>2.4--3.2 | 1.6--4.1<br>1.7--3.8 | 1.1--4.8<br>1.3--4.1 |
| 25 years   | 2.2--3.5<br>1.9--3.4 | 1.7--3.9<br>1.4--3.6 | 0.9--4.6<br>1.3--4.3 | 2.3--3.6<br>2.2--3.7 | 1.6--4.1<br>2.0--4.1 | 1.1--4.7<br>1.3--4.5 |
| 26 years   | 2.2--3.4<br>2.0--3.5 | 1.7--3.8<br>1.7--4.1 | 0.9--4.5<br>1.4--4.6 | 2.3--3.6<br>2.2--3.7 | 1.6--4.1<br>1.7--4.2 | 1.1--4.7<br>1.2--4.4 |
| 27 years   | 2.2--3.4<br>2.5--3.6 | 1.7--3.8<br>2.2--3.9 | 0.9--4.4<br>1.3--4.3 | 2.2--3.6<br>2.3--3.8 | 1.6--4.0<br>1.8--4.2 | 1.1--4.6<br>1.3--4.4 |
| 28 years   | 2.2--3.4<br>2.4--3.5 | 1.7--3.8<br>1.9--3.8 | 0.9--4.4<br>0.9--4.3 | 2.2--3.6<br>2.3--3.7 | 1.6--4.0<br>1.8--4.1 | 1.1--4.6<br>1.5--4.8 |
| 29 years   | 2.1--3.4<br>2.7--3.4 | 1.7--3.7<br>2.4--3.6 | 0.9--4.3<br>1.6--4.2 | 2.2--3.6<br>2.4--3.4 | 1.6--4.0<br>2.0--4.0 | 1.1--4.6<br>1.7--4.2 |
| 30 years   | 2.1--3.4<br>2.6--3.4 | 1.7--3.7<br>2.2--3.9 | 0.9--4.2<br>1.6--4.3 | 2.2--3.6<br>2.6--3.9 | 1.6--4.0<br>2.0--4.0 | 1.0--4.6<br>0.9--4.3 |
| 31 years   | 2.1--3.3<br>2.0--3.5 | 1.7--3.7<br>1.7--3.7 | 0.8--4.2<br>1.0--4.3 | 2.1--3.5<br>2.2--3.8 | 1.6--4.0<br>1.6--4.0 | 1.0--4.5<br>0.9--4.6 |
| 32 years   | 2.0--3.3<br>2.1--3.5 | 1.7--3.7<br>1.8--3.7 | 0.8--4.2<br>0.8--4.0 | 2.1--3.5<br>2.0--3.4 | 1.6--4.0<br>1.5--3.8 | 1.0--4.6<br>0.4--4.5 |
| 33 years   | 2.0--3.3<br>1.9--2.9 | 1.6--3.7<br>1.7--3.4 | 0.8--4.1<br>0.6--4.0 | 2.1--3.5<br>2.0--3.3 | 1.6--4.0<br>1.4--3.7 | 0.9--4.6<br>0.3--4.1 |
| 34 years   | 2.0--3.3             | 1.6--3.6             | 0.8--4.1             | 2.1--3.5             | 1.6--3.9             | 0.9--4.6             |

|          |                      |                      |                      |                      |                      |                      |
|----------|----------------------|----------------------|----------------------|----------------------|----------------------|----------------------|
|          | 1.7--3.0             | 1.2--3.3             | 0.4--3.7             | 1.8--3.6             | 1.5--4.0             | 1.4--4.6             |
| 35 years | 2.0--3.3<br>1.7--3.1 | 1.6--3.6<br>1.2--3.3 | 0.8--4.1<br>0.9--3.7 | 2.1--3.4<br>2.2--3.5 | 1.5--3.9<br>1.6--4.0 | 0.9--4.6<br>1.2--4.7 |
| 36 years | 1.9--3.2<br>1.9--3.3 | 1.6--3.6<br>1.7--3.6 | 0.8--4.1<br>1.0--4.3 | 2.1--3.4<br>2.1--3.3 | 1.5--3.9<br>1.6--3.8 | 0.8--4.5<br>1.2--4.1 |
| 37 years | 1.9--3.2<br>2.0--3.5 | 1.6--3.6<br>1.8--3.8 | 0.9--4.1<br>1.6--4.3 | 2.1--3.4<br>2.0--3.4 | 1.5--3.9<br>1.6--3.8 | 0.8--4.5<br>1.3--4.6 |
| 38 years | 1.9--3.2<br>1.8--3.2 | 1.6--3.6<br>1.5--3.6 | 0.9--4.1<br>0.9--3.8 | 2.0--3.4<br>2.3--3.4 | 1.4--3.9<br>1.8--4.2 | 0.8--4.5<br>1.3--4.6 |
| 39 years | 1.9--3.2<br>1.7--3.3 | 1.6--3.6<br>1.5--3.6 | 0.9--4.1<br>0.8--4.1 | 2.0--3.4<br>2.0--3.1 | 1.4--3.8<br>1.6--4.0 | 0.7--4.5<br>0.7--4.6 |
| 40 years | 1.9--3.2<br>2.1--3.2 | 1.6--3.5<br>1.6--3.6 | 0.9--4.1<br>1.0--4.1 | 2.0--3.3<br>2.0--3.2 | 1.4--3.8<br>1.0--3.9 | 0.7--4.5<br>0.6--4.5 |
| 41 years | 1.9--3.1<br>1.9--2.9 | 1.5--3.5<br>1.5--3.3 | 0.9--4.1<br>1.0--3.6 | 2.0--3.3<br>2.2--3.1 | 1.4--3.8<br>1.2--3.4 | 0.7--4.5<br>0.7--3.8 |
| 42 years | 1.8--3.1<br>1.9--3.1 | 1.5--3.5<br>1.8--3.5 | 0.9--4.1<br>1.1--3.8 | 2.0--3.3<br>2.2--3.3 | 1.3--3.8<br>1.3--3.7 | 0.7--4.5<br>0.9--3.9 |
| 43 years | 1.8--3.1<br>2.1--3.3 | 1.5--3.5<br>1.9--3.6 | 0.8--4.1<br>1.5--4.0 | 2.0--3.3<br>1.9--3.3 | 1.3--3.8<br>1.1--3.6 | 0.7--4.5<br>0.5--4.2 |
| 44 years | 1.8--3.1<br>2.0--3.2 | 1.5--3.4<br>1.6--3.5 | 0.8--4.1<br>1.0--4.3 | 1.9--3.3<br>1.6--3.3 | 1.3--3.8<br>1.1--3.8 | 0.7--4.5<br>0.5--3.9 |
| 45 years | 1.8--3.0<br>1.7--3.1 | 1.5--3.4<br>1.5--3.7 | 0.8--4.1<br>0.7--4.2 | 1.9--3.3<br>2.0--3.3 | 1.3--3.8<br>1.3--3.8 | 0.7--4.5<br>0.7--4.5 |
| 46 years | 1.8--3.0<br>1.6--2.8 | 1.5--3.4<br>1.4--3.3 | 0.8--4.1<br>1.0--3.7 | 1.9--3.3<br>2.2--3.2 | 1.3--3.8<br>1.6--3.8 | 0.7--4.5<br>1.0--4.4 |
| 47 years | 1.7--3.0<br>1.7--3.0 | 1.4--3.3<br>1.6--3.3 | 0.7--4.0<br>1.2--3.9 | 1.9--3.3<br>1.9--3.6 | 1.3--3.8<br>1.5--4.0 | 0.7--4.5<br>0.8--4.6 |
| 48 years | 1.7--2.9<br>1.9--2.9 | 1.4--3.3<br>1.4--3.2 | 0.7--4.0<br>0.6--3.7 | 1.9--3.3<br>1.7--3.2 | 1.3--3.8<br>1.2--3.9 | 0.7--4.5<br>0.7--4.6 |
| 49 years | 1.7--2.9<br>1.7--2.9 | 1.4--3.3<br>1.0--3.1 | 0.7--4.0<br>0.6--3.8 | 1.9--3.3<br>1.8--3.2 | 1.4--3.8<br>1.2--3.9 | 0.7--4.5<br>0.7--4.4 |
| 50 years | 1.6--2.9<br>1.6--2.9 | 1.3--3.2<br>1.4--3.3 | 0.7--3.9<br>0.7--4.1 | 1.9--3.3<br>1.7--3.7 | 1.4--3.8<br>1.2--4.2 | 0.7--4.5<br>0.7--4.5 |
| 51 years | 1.6--2.8<br>1.5--2.8 | 1.3--3.2<br>1.4--3.2 | 0.7--3.9<br>1.3--4.2 | 1.9--3.3<br>1.8--3.4 | 1.4--3.8<br>1.5--3.8 | 0.7--4.5<br>0.9--4.5 |
| 52 years | 1.6--2.8<br>1.6--3.1 | 1.3--3.2<br>1.4--3.2 | 0.6--3.9<br>1.3--3.6 | 1.9--3.3<br>2.1--3.2 | 1.4--3.8<br>1.8--3.4 | 0.7--4.5<br>1.1--4.1 |
| 53 years | 1.6--2.8<br>1.5--2.7 | 1.3--3.2<br>1.0--3.2 | 0.6--3.8<br>0.5--3.7 | 1.9--3.2<br>2.0--3.2 | 1.4--3.8<br>1.6--3.7 | 0.7--4.5<br>0.9--4.9 |
| 54 years | 1.6--2.7<br>1.2--2.4 | 1.3--3.1<br>0.9--2.7 | 0.6--3.8<br>0.5--3.6 | 1.9--3.2<br>1.7--3.2 | 1.4--3.8<br>1.4--3.9 | 0.7--4.4<br>0.4--4.8 |
| 55 years | 1.5--2.7<br>1.4--2.7 | 1.3--3.1<br>1.2--3.0 | 0.6--3.7<br>0.8--3.7 | 1.9--3.2<br>1.6--3.1 | 1.4--3.8<br>1.4--3.5 | 0.7--4.4<br>0.3--4.1 |
| 56 years | 1.5--2.7<br>1.7--3.0 | 1.2--3.1<br>1.3--3.3 | 0.6--3.7<br>0.8--3.7 | 1.8--3.2<br>2.1--3.2 | 1.5--3.8<br>1.6--3.4 | 0.7--4.4<br>1.3--4.1 |
| 57 years | 1.5--2.6<br>1.6--2.6 | 1.2--3.1<br>1.3--3.1 | 0.6--3.6<br>0.3--3.4 | 1.8--3.2<br>2.2--3.3 | 1.5--3.8<br>1.8--3.8 | 0.7--4.4<br>1.1--4.4 |
| 58 years | 1.5--2.6<br>1.6--2.6 | 1.2--3.0<br>1.3--3.0 | 0.6--3.6<br>0.3--3.5 | 1.8--3.2<br>2.1--3.4 | 1.4--3.8<br>1.7--4.1 | 0.8--4.4<br>1.1--4.3 |



|            |                      |                      |                      |                      |                      |                      |
|------------|----------------------|----------------------|----------------------|----------------------|----------------------|----------------------|
| 59 years   | 1.5--2.6<br>1.7--2.5 | 1.2--3.0<br>1.3--2.9 | 0.6--3.6<br>0.7--3.5 | 1.8--3.1<br>2.0--3.5 | 1.4--3.7<br>1.7--4.1 | 0.8--4.4<br>1.2--4.2 |
| 60 years   | 1.5--2.5<br>1.8--2.6 | 1.1--3.0<br>1.4--2.9 | 0.6--3.5<br>0.8--3.3 | 1.8--3.1<br>1.8--3.4 | 1.4--3.7<br>1.3--3.7 | 0.8--4.4<br>0.7--4.3 |
| 61 years   | 1.4--2.5<br>1.5--2.7 | 1.1--2.9<br>1.3--3.1 | 0.5--3.5<br>0.8--3.6 | 1.7--3.1<br>1.5--3.5 | 1.4--3.6<br>1.2--4.0 | 0.8--4.3<br>0.8--4.4 |
| 62 years   | 1.4--2.5<br>1.5--2.3 | 1.1--2.9<br>1.2--3.0 | 0.5--3.5<br>0.7--3.9 | 1.7--3.0<br>1.7--3.0 | 1.4--3.6<br>1.3--3.7 | 0.8--4.3<br>0.9--4.3 |
| 63 years   | 1.4--2.4<br>1.4--2.3 | 1.1--2.8<br>1.2--2.8 | 0.5--3.5<br>0.6--3.3 | 1.7--3.0<br>1.7--2.8 | 1.4--3.5<br>1.3--3.0 | 0.8--4.3<br>1.1--3.3 |
| 64 years   | 1.3--2.4<br>1.3--2.3 | 1.1--2.8<br>1.0--2.6 | 0.4--3.5<br>0.6--3.2 | 1.7--2.9<br>1.7--2.8 | 1.4--3.4<br>1.4--3.3 | 0.8--4.2<br>1.3--4.5 |
| 65 years   | 1.3--2.4<br>1.3--2.4 | 1.0--2.8<br>1.1--2.6 | 0.4--3.5<br>0.6--3.5 | 1.7--2.9<br>1.6--2.8 | 1.3--3.4<br>1.4--3.4 | 0.8--4.2<br>1.0--4.3 |
| 66 years   | 1.2--2.4<br>1.4--2.3 | 1.0--2.8<br>1.1--2.6 | 0.4--3.4<br>1.0--3.4 | 1.6--2.9<br>1.6--2.6 | 1.3--3.3<br>1.4--2.9 | 0.8--4.2<br>1.1--3.5 |
| 67 years   | 1.2--2.3<br>1.1--2.3 | 0.9--2.7<br>1.0--2.7 | 0.3--3.4<br>0.5--3.5 | 1.6--2.8<br>1.7--2.7 | 1.3--3.3<br>1.5--3.3 | 0.7--4.1<br>1.2--3.8 |
| 68 years   | 1.2--2.3<br>1.1--2.5 | 0.9--2.7<br>0.6--2.7 | 0.3--3.4<br>0.0--3.2 | 1.6--2.8<br>1.6--3.0 | 1.2--3.2<br>1.4--3.5 | 0.7--4.1<br>0.9--3.8 |
| 69 years   | 1.2--2.3<br>1.0--2.3 | 0.8--2.7<br>0.9--2.6 | 0.3--3.4<br>0.2--3.1 | 1.5--2.7<br>1.6--3.0 | 1.2--3.1<br>1.3--3.2 | 0.7--4.0<br>1.0--3.8 |
| 70 years   | 1.1--2.3<br>1.1--2.1 | 0.8--2.7<br>1.0--2.3 | 0.3--3.4<br>0.4--2.9 | 1.5--2.7<br>1.5--2.8 | 1.1--3.1<br>1.0--3.0 | 0.7--3.9<br>0.5--3.4 |
| 71 years   | 1.1--2.2<br>1.0--1.9 | 0.8--2.7<br>0.9--2.1 | 0.3--3.4<br>0.3--2.8 | 1.5--2.6<br>1.3--2.6 | 1.1--3.0<br>0.7--2.9 | 0.6--3.9<br>0.5--3.0 |
| 72 years   | 1.1--2.2<br>1.0--2.0 | 0.8--2.7<br>0.5--2.4 | 0.2--3.4<br>0.3--3.2 | 1.5--2.6<br>1.7--2.6 | 1.1--3.0<br>1.0--2.9 | 0.6--3.9<br>0.9--3.2 |
| 73 years   | 1.1--2.2<br>1.2--2.2 | 0.7--2.7<br>0.8--2.7 | 0.3--3.4<br>0.3--3.3 | 1.4--2.5<br>1.5--2.5 | 1.0--2.9<br>0.9--2.8 | 0.6--3.9<br>0.5--3.2 |
| 74 years   | 1.1--2.2<br>1.3--2.5 | 0.7--2.7<br>0.7--2.8 | 0.3--3.4<br>0.3--3.7 | 1.4--2.5<br>1.0--2.1 | 1.0--2.9<br>0.9--2.5 | 0.6--4.0<br>0.3--3.0 |
| 75 years   | 1.0--2.2<br>1.2--2.0 | 0.7--2.7<br>0.6--2.5 | 0.3--3.4<br>0.5--3.8 | 1.4--2.4<br>1.5--2.0 | 1.0--2.8<br>1.1--3.7 | 0.6--3.9<br>1.0--4.6 |
| 76 years   | 1.0--2.1<br>1.2--2.2 | 0.6--2.7<br>1.0--2.9 | 0.3--3.3<br>0.6--3.4 | 1.4--2.4<br>1.3--2.0 | 1.0--2.8<br>0.9--3.0 | 0.7--3.8<br>0.8--4.6 |
| 77 years   | 1.0--2.1<br>1.5--2.6 | 0.6--2.6<br>1.1--3.0 | 0.3--3.3<br>0.6--3.2 | 1.3--2.4<br>1.2--2.0 | 0.9--2.7<br>0.9--2.5 | 0.7--3.7<br>0.8--2.8 |
| 78 years   | 0.9--2.0<br>1.6--2.4 | 0.6--2.6<br>1.3--2.8 | 0.2--3.2<br>0.6--2.8 | 1.3--2.4<br>1.6--2.4 | 0.9--2.7<br>1.2--2.5 | 0.7--3.6<br>0.8--2.8 |
| 79 years   | 0.9--2.0<br>1.4--2.5 | 0.5--2.5<br>1.0--2.8 | 0.2--3.1<br>0.7--3.0 | 1.3--2.3<br>1.7--1.8 | 0.9--2.6<br>1.2--2.1 | 0.7--3.5<br>0.8--2.3 |
| 80 years   | 0.9--1.9<br>0.7--1.7 | 0.5--2.4<br>0.4--2.0 | 0.2--3.0<br>0.1--2.7 | 1.3--2.3<br>1.5--2.4 | 0.9--2.6<br>0.9--2.6 | 0.7--3.4<br>0.7--3.1 |
| > 80 years | N/A                  | N/A                  | N/A                  | N/A                  | N/A                  | N/A                  |

Table S9. Age norm lookup table for spindle frequency (Hz) during N2 at central channel. In each cell, the first row is from smoothed value, the second row is from unsmoothed value (actual data). 5 to 11 months and > 80 years are not applicable since they are not present in the dataset.

| Age            | Male 50% range | Male 75% range | Male 95% range | Female 50% range | Female 75% range | Female 95% range |
|----------------|----------------|----------------|----------------|------------------|------------------|------------------|
| 0.5 months     | 13.1--13.3     | 13.0--13.4     | 12.8--13.6     | 13.1--13.3       | 13.0--13.4       | 12.8--13.6       |
|                | 13.1--13.3     | 13.0--13.4     | 12.7--13.6     | 13.1--13.3       | 13.0--13.4       | 12.7--13.6       |
| 1 months       | 13.1--13.3     | 13.0--13.4     | 12.8--13.5     | 13.1--13.3       | 13.0--13.4       | 12.8--13.5       |
|                | 13.1--13.3     | 13.0--13.3     | 12.8--13.5     | 13.1--13.3       | 13.0--13.3       | 12.8--13.5       |
| 1.5 months     | 13.1--13.3     | 13.0--13.3     | 12.8--13.5     | 13.1--13.3       | 13.0--13.3       | 12.8--13.5       |
|                | 13.1--13.2     | 13.1--13.3     | 13.0--13.4     | 13.1--13.2       | 13.1--13.3       | 13.0--13.4       |
| 2 months       | 13.1--13.2     | 13.0--13.3     | 12.8--13.4     | 13.1--13.2       | 13.0--13.3       | 12.8--13.4       |
|                | 13.1--13.2     | 13.0--13.3     | 12.9--13.4     | 13.1--13.2       | 13.0--13.3       | 12.9--13.4       |
| 2.5 months     | 13.1--13.2     | 13.0--13.3     | 12.9--13.4     | 13.1--13.2       | 13.0--13.3       | 12.9--13.4       |
|                | 13.1--13.2     | 13.0--13.3     | 12.8--13.3     | 13.1--13.2       | 13.0--13.3       | 12.8--13.3       |
| 3 months       | 13.0--13.2     | 13.0--13.3     | 12.8--13.3     | 13.0--13.2       | 13.0--13.3       | 12.8--13.4       |
|                | 13.1--13.3     | 13.0--13.3     | 12.9--13.4     | 13.1--13.3       | 13.0--13.3       | 12.9--13.4       |
| 3.5 months     | 12.9--13.1     | 12.9--13.2     | 12.7--13.3     | 13.0--13.1       | 12.9--13.2       | 12.7--13.3       |
|                | 13.2--13.4     | 13.0--13.4     | 13.0--13.4     | 13.2--13.4       | 13.0--13.4       | 13.0--13.4       |
| 4 months       | 12.9--13.0     | 12.8--13.2     | 12.6--13.3     | 12.9--13.0       | 12.8--13.2       | 12.6--13.3       |
|                | 13.1--13.4     | 13.0--13.4     | 13.0--13.6     | 13.1--13.4       | 13.0--13.4       | 13.0--13.6       |
| 5 to 11 months | N/A            | N/A            | N/A            | N/A              | N/A              | N/A              |
| 1 years        | 11.5--11.9     | 11.4--12.5     | 11.2--12.8     | 11.5--12.0       | 11.4--12.5       | 11.2--13.0       |
|                | 12.6--12.8     | 12.5--13.1     | 12.4--13.4     | 12.6--13.0       | 12.5--13.2       | 12.4--13.5       |
| 2 years        | 11.5--12.0     | 11.4--12.5     | 11.2--12.8     | 11.6--12.0       | 11.4--12.5       | 11.2--12.9       |
|                | 11.4--11.5     | 11.3--11.6     | 11.1--11.8     | 11.3--11.5       | 11.2--11.6       | 11.2--11.7       |
| 3 years        | 11.6--12.0     | 11.5--12.4     | 11.3--12.8     | 11.6--12.0       | 11.5--12.4       | 11.2--12.9       |
|                | 11.5--11.7     | 11.5--11.8     | 11.3--11.9     | 11.6--11.8       | 11.5--11.9       | 11.4--12.0       |
| 4 years        | 11.6--12.0     | 11.5--12.3     | 11.3--12.7     | 11.7--12.1       | 11.5--12.3       | 11.3--12.8       |
|                | 11.7--11.9     | 11.6--12.0     | 11.4--12.1     | 11.7--12.1       | 11.7--12.1       | 11.5--12.2       |
| 5 years        | 11.7--12.1     | 11.6--12.2     | 11.4--12.6     | 11.8--12.2       | 11.6--12.3       | 11.4--12.6       |
|                | 11.8--12.0     | 11.7--12.1     | 11.6--12.3     | 11.9--12.1       | 11.8--12.2       | 11.7--12.3       |
| 6 years        | 11.8--12.2     | 11.7--12.3     | 11.4--12.5     | 11.9--12.3       | 11.7--12.4       | 11.5--12.6       |
|                | 11.8--12.1     | 11.8--12.2     | 11.6--12.3     | 11.8--12.1       | 11.8--12.2       | 11.7--12.5       |
| 7 years        | 11.9--12.3     | 11.8--12.4     | 11.5--12.6     | 12.0--12.4       | 11.8--12.4       | 11.6--12.6       |
|                | 11.9--12.2     | 11.9--12.3     | 11.6--12.4     | 11.9--12.3       | 11.8--12.4       | 11.7--12.6       |
| 8 years        | 12.0--12.4     | 11.9--12.5     | 11.7--12.7     | 12.1--12.5       | 11.9--12.6       | 11.7--12.8       |
|                | 12.0--12.3     | 11.9--12.4     | 11.8--12.6     | 12.1--12.4       | 12.0--12.5       | 11.7--12.7       |
| 9 years        | 12.1--12.5     | 12.0--12.7     | 11.8--12.9     | 12.2--12.6       | 12.0--12.7       | 11.8--12.9       |
|                | 12.1--12.4     | 12.0--12.5     | 11.9--12.6     | 12.3--12.5       | 12.2--12.6       | 12.0--12.7       |
| 10 years       | 12.3--12.7     | 12.1--12.8     | 11.9--13.0     | 12.3--12.7       | 12.2--12.8       | 12.0--13.0       |
|                | 12.3--12.5     | 12.2--12.6     | 12.1--12.7     | 12.4--12.6       | 12.3--12.6       | 12.2--12.7       |
| 11 years       | 12.4--12.8     | 12.2--12.9     | 12.0--13.1     | 12.4--12.8       | 12.3--12.9       | 12.1--13.1       |
|                | 12.4--12.7     | 12.4--12.8     | 12.3--13.0     | 12.4--12.6       | 12.4--12.7       | 12.2--12.9       |
| 12 years       | 12.5--12.9     | 12.4--13.0     | 12.2--13.2     | 12.5--12.9       | 12.4--13.0       | 12.2--13.3       |
|                | 12.5--12.8     | 12.4--13.0     | 12.3--13.1     | 12.5--12.8       | 12.4--12.9       | 12.3--13.0       |
| 13 years       | 12.6--13.0     | 12.5--13.1     | 12.3--13.3     | 12.6--13.0       | 12.5--13.1       | 12.3--13.4       |
|                | 12.7--13.0     | 12.6--13.1     | 12.3--13.3     | 12.7--13.0       | 12.6--13.0       | 12.4--13.1       |
| 14 years       | 12.7--13.1     | 12.6--13.1     | 12.4--13.4     | 12.7--13.1       | 12.6--13.3       | 12.5--13.5       |

|          |                          |                          |                          |                          |                          |                          |
|----------|--------------------------|--------------------------|--------------------------|--------------------------|--------------------------|--------------------------|
|          | 12.7--13.0               | 12.6--13.1               | 12.4--13.3               | 12.7--13.0               | 12.7--13.0               | 12.6--13.1               |
| 15 years | 12.8--13.2<br>12.7--13.1 | 12.6--13.2<br>12.6--13.2 | 12.5--13.5<br>12.5--13.6 | 12.8--13.2<br>13.0--13.3 | 12.7--13.4<br>12.9--13.3 | 12.6--13.6<br>12.7--13.4 |
| 16 years | 12.8--13.3<br>12.8--13.1 | 12.7--13.4<br>12.7--13.2 | 12.5--13.6<br>12.7--13.6 | 13.0--13.3<br>13.0--13.3 | 12.9--13.6<br>13.0--13.5 | 12.7--13.7<br>13.0--13.7 |
| 17 years | 12.9--13.3<br>12.9--13.1 | 12.8--13.5<br>12.8--13.2 | 12.6--13.8<br>12.7--13.4 | 13.1--13.5<br>13.2--13.6 | 13.0--13.6<br>13.2--13.6 | 12.8--13.8<br>13.1--13.7 |
| 18 years | 13.0--13.4<br>13.1--13.4 | 12.9--13.6<br>12.9--13.5 | 12.7--13.9<br>12.7--13.7 | 13.2--13.6<br>13.2--13.6 | 13.1--13.7<br>13.1--13.6 | 12.9--13.9<br>12.9--13.8 |
| 19 years | 13.1--13.5<br>13.2--13.5 | 12.9--13.7<br>13.2--13.6 | 12.8--13.9<br>12.8--13.9 | 13.3--13.6<br>13.3--13.6 | 13.2--13.8<br>13.2--13.7 | 13.0--14.0<br>13.0--14.1 |
| 20 years | 13.1--13.5<br>13.4--13.7 | 13.0--13.7<br>13.4--13.8 | 12.8--14.0<br>13.2--13.9 | 13.3--13.7<br>13.5--13.7 | 13.2--13.8<br>13.3--13.8 | 13.1--14.0<br>13.2--14.0 |
| 21 years | 13.2--13.6<br>13.5--13.8 | 13.1--13.7<br>13.4--14.0 | 12.9--14.0<br>13.3--14.2 | 13.4--13.8<br>13.6--13.8 | 13.3--13.9<br>13.5--13.9 | 13.1--14.1<br>13.4--14.0 |
| 22 years | 13.2--13.6<br>13.4--13.7 | 13.1--13.8<br>13.3--14.0 | 12.9--14.1<br>13.2--14.2 | 13.5--13.8<br>13.6--13.9 | 13.4--13.9<br>13.5--13.9 | 13.2--14.1<br>13.2--14.0 |
| 23 years | 13.3--13.7<br>13.3--13.7 | 13.1--13.8<br>13.2--13.8 | 13.0--14.1<br>13.0--13.8 | 13.5--13.9<br>13.6--13.8 | 13.4--13.9<br>13.5--13.9 | 13.2--14.1<br>13.2--14.0 |
| 24 years | 13.3--13.7<br>13.3--13.6 | 13.2--13.8<br>13.2--13.8 | 13.0--14.1<br>13.1--13.8 | 13.5--13.9<br>13.6--13.8 | 13.4--13.9<br>13.5--13.9 | 13.2--14.2<br>13.4--14.0 |
| 25 years | 13.3--13.7<br>13.4--13.7 | 13.2--13.8<br>13.3--13.8 | 13.0--14.1<br>13.3--14.1 | 13.5--13.9<br>13.6--13.8 | 13.5--14.0<br>13.5--13.9 | 13.2--14.2<br>13.2--14.0 |
| 26 years | 13.3--13.7<br>13.4--13.8 | 13.2--13.8<br>13.3--14.0 | 13.1--14.1<br>13.1--14.1 | 13.6--13.9<br>13.5--13.8 | 13.5--14.0<br>13.4--13.9 | 13.2--14.2<br>13.2--14.1 |
| 27 years | 13.4--13.7<br>13.3--13.7 | 13.2--13.8<br>13.2--13.8 | 13.1--14.1<br>13.1--14.0 | 13.6--13.9<br>13.5--13.8 | 13.5--14.0<br>13.4--14.0 | 13.2--14.1<br>13.4--14.1 |
| 28 years | 13.4--13.7<br>13.3--13.7 | 13.3--13.8<br>13.2--13.8 | 13.1--14.1<br>13.1--13.9 | 13.6--13.9<br>13.5--13.8 | 13.5--14.0<br>13.4--13.9 | 13.2--14.1<br>13.2--13.9 |
| 29 years | 13.4--13.7<br>13.3--13.8 | 13.3--13.8<br>13.2--13.8 | 13.1--14.1<br>13.1--13.9 | 13.6--13.9<br>13.6--13.9 | 13.5--14.0<br>13.4--13.9 | 13.2--14.1<br>13.2--14.1 |
| 30 years | 13.4--13.7<br>13.3--13.7 | 13.3--13.8<br>13.2--13.8 | 13.1--14.1<br>13.1--13.9 | 13.6--13.9<br>13.5--13.9 | 13.5--14.0<br>13.3--14.1 | 13.2--14.1<br>13.3--14.2 |
| 31 years | 13.4--13.7<br>13.3--13.7 | 13.3--13.8<br>13.2--13.9 | 13.1--14.1<br>13.1--14.0 | 13.6--13.9<br>13.5--13.9 | 13.5--14.0<br>13.3--14.0 | 13.2--14.1<br>13.2--14.1 |
| 32 years | 13.4--13.7<br>13.3--13.7 | 13.3--13.8<br>13.3--13.9 | 13.1--14.0<br>13.2--14.1 | 13.6--13.9<br>13.5--13.9 | 13.5--14.0<br>13.4--13.9 | 13.2--14.1<br>13.2--14.1 |
| 33 years | 13.4--13.7<br>13.4--13.7 | 13.3--13.8<br>13.3--13.8 | 13.1--14.0<br>13.1--14.1 | 13.6--13.9<br>13.5--13.9 | 13.5--14.0<br>13.4--14.0 | 13.2--14.1<br>13.1--14.2 |
| 34 years | 13.4--13.7<br>13.4--13.7 | 13.3--13.8<br>13.4--13.8 | 13.1--14.0<br>13.1--14.0 | 13.6--13.9<br>13.6--13.9 | 13.5--14.0<br>13.5--14.0 | 13.2--14.1<br>13.3--14.2 |
| 35 years | 13.4--13.7<br>13.5--13.7 | 13.3--13.9<br>13.4--13.8 | 13.1--14.0<br>13.1--13.9 | 13.6--13.9<br>13.6--13.8 | 13.5--14.0<br>13.5--13.9 | 13.2--14.1<br>13.2--14.1 |
| 36 years | 13.4--13.7<br>13.5--13.7 | 13.3--13.9<br>13.3--13.8 | 13.1--14.0<br>13.1--14.0 | 13.6--13.9<br>13.6--13.8 | 13.5--14.0<br>13.5--13.9 | 13.2--14.1<br>13.2--14.1 |
| 37 years | 13.4--13.7<br>13.4--13.8 | 13.3--13.9<br>13.3--13.9 | 13.1--14.0<br>13.2--14.0 | 13.6--13.9<br>13.5--13.9 | 13.5--13.9<br>13.4--14.0 | 13.2--14.1<br>13.0--14.1 |
| 38 years | 13.4--13.8<br>13.4--13.8 | 13.3--13.9<br>13.3--13.9 | 13.1--14.0<br>13.2--14.0 | 13.6--13.9<br>13.5--13.9 | 13.5--13.9<br>13.5--14.0 | 13.2--14.1<br>13.1--14.1 |



|            |                          |                          |                          |                          |                          |                          |
|------------|--------------------------|--------------------------|--------------------------|--------------------------|--------------------------|--------------------------|
| 64 years   | 13.5--13.8<br>13.4--13.8 | 13.4--13.8<br>13.4--13.8 | 13.2--14.0<br>13.2--14.0 | 13.5--13.8<br>13.5--13.8 | 13.4--13.9<br>13.4--13.9 | 13.2--14.0<br>13.2--14.0 |
| 65 years   | 13.5--13.8<br>13.4--13.7 | 13.4--13.8<br>13.4--13.8 | 13.2--14.0<br>13.4--14.0 | 13.5--13.8<br>13.5--13.7 | 13.4--13.9<br>13.4--13.9 | 13.2--14.0<br>13.3--14.0 |
| 66 years   | 13.5--13.8<br>13.5--13.8 | 13.4--13.8<br>13.4--13.9 | 13.2--14.0<br>13.3--14.1 | 13.5--13.8<br>13.5--13.8 | 13.4--13.9<br>13.4--13.9 | 13.2--14.0<br>13.4--14.0 |
| 67 years   | 13.5--13.8<br>13.5--13.8 | 13.4--13.8<br>13.4--13.9 | 13.2--14.0<br>13.3--14.1 | 13.5--13.8<br>13.6--13.8 | 13.4--13.9<br>13.4--13.9 | 13.2--14.0<br>13.2--14.1 |
| 68 years   | 13.5--13.8<br>13.5--13.7 | 13.4--13.8<br>13.4--13.8 | 13.2--14.0<br>13.3--13.9 | 13.5--13.8<br>13.5--13.8 | 13.4--13.9<br>13.4--13.9 | 13.2--14.0<br>13.2--14.1 |
| 69 years   | 13.5--13.8<br>13.5--13.7 | 13.4--13.8<br>13.4--13.8 | 13.3--14.0<br>13.3--13.9 | 13.5--13.8<br>13.5--13.8 | 13.4--13.9<br>13.3--13.9 | 13.2--14.0<br>13.3--14.0 |
| 70 years   | 13.5--13.8<br>13.6--13.8 | 13.4--13.8<br>13.5--13.8 | 13.3--14.0<br>13.3--13.9 | 13.5--13.8<br>13.5--13.9 | 13.4--13.9<br>13.3--13.9 | 13.2--14.0<br>13.3--13.9 |
| 71 years   | 13.5--13.8<br>13.6--13.8 | 13.4--13.8<br>13.6--13.9 | 13.3--14.0<br>13.5--13.9 | 13.5--13.8<br>13.5--13.8 | 13.4--13.9<br>13.4--13.9 | 13.2--14.0<br>13.0--13.9 |
| 72 years   | 13.5--13.8<br>13.6--13.7 | 13.4--13.8<br>13.5--13.8 | 13.3--14.0<br>13.2--13.9 | 13.5--13.8<br>13.5--13.8 | 13.4--13.9<br>13.5--13.8 | 13.3--14.0<br>13.0--13.8 |
| 73 years   | 13.5--13.8<br>13.5--13.7 | 13.4--13.8<br>13.4--13.8 | 13.3--14.0<br>13.2--14.0 | 13.5--13.8<br>13.6--13.8 | 13.4--13.9<br>13.5--13.8 | 13.3--14.0<br>13.5--13.9 |
| 74 years   | 13.5--13.8<br>13.5--13.8 | 13.4--13.8<br>13.4--13.8 | 13.3--13.9<br>13.3--14.0 | 13.5--13.8<br>13.7--13.8 | 13.4--13.8<br>13.4--13.9 | 13.3--14.0<br>13.2--13.9 |
| 75 years   | 13.5--13.8<br>13.5--13.8 | 13.4--13.8<br>13.4--13.8 | 13.3--13.9<br>13.2--13.8 | 13.5--13.8<br>13.6--13.8 | 13.4--13.8<br>13.4--13.9 | 13.3--14.0<br>13.2--13.9 |
| 76 years   | 13.5--13.8<br>13.6--13.8 | 13.5--13.8<br>13.5--13.8 | 13.3--13.9<br>13.3--13.8 | 13.5--13.8<br>13.5--13.8 | 13.4--13.8<br>13.4--13.8 | 13.3--14.0<br>13.4--13.9 |
| 77 years   | 13.5--13.8<br>13.6--13.7 | 13.5--13.8<br>13.5--13.8 | 13.3--13.9<br>13.4--13.9 | 13.5--13.8<br>13.5--13.6 | 13.4--13.8<br>13.4--13.7 | 13.3--14.0<br>13.4--13.7 |
| 78 years   | 13.6--13.8<br>13.6--13.7 | 13.5--13.8<br>13.6--13.8 | 13.3--13.9<br>13.4--13.9 | 13.5--13.8<br>13.6--13.6 | 13.4--13.8<br>13.6--13.7 | 13.3--14.0<br>13.5--13.7 |
| 79 years   | 13.6--13.8<br>13.6--13.8 | 13.5--13.8<br>13.6--13.8 | 13.3--13.9<br>13.5--13.9 | 13.5--13.8<br>13.7--13.9 | 13.4--13.8<br>13.6--14.0 | 13.3--13.9<br>13.6--14.1 |
| 80 years   | 13.6--13.8<br>13.6--13.8 | 13.5--13.8<br>13.5--13.8 | 13.3--13.9<br>13.4--13.9 | 13.5--13.8<br>13.4--13.8 | 13.4--13.8<br>13.3--13.8 | 13.3--13.9<br>13.3--14.0 |
| > 80 years | N/A                      | N/A                      | N/A                      | N/A                      | N/A                      | N/A                      |

Table S10. Age norm lookup table for spindle frequency (Hz) during N2 at frontal channel. In each cell, the first row is from smoothed value, the second row is from unsmoothed value (actual data). < 13 years and > 80 years are not applicable since they are not present in the dataset.

| Age        | Male 50% range | Male 75% range | Male 95% range | Female 50% range | Female 75% range | Female 95% range |
|------------|----------------|----------------|----------------|------------------|------------------|------------------|
| < 13 years | N/A            | N/A            | N/A            | N/A              | N/A              | N/A              |
| 13 years   | 12.0--12.3     | 11.9--12.3     | 11.7--12.5     | 12.1--12.3       | 12.0--12.4       | 11.9--12.6       |
|            | 12.0--12.2     | 11.8--12.3     | 11.7--12.4     | 12.1--12.3       | 12.0--12.3       | 12.0--12.3       |
| 14 years   | 12.0--12.3     | 11.9--12.3     | 11.7--12.5     | 12.1--12.3       | 12.0--12.4       | 11.9--12.6       |
|            | 12.0--12.3     | 11.9--12.3     | 11.8--12.3     | 12.0--12.2       | 12.0--12.2       | 12.0--12.2       |
| 15 years   | 12.0--12.3     | 11.9--12.3     | 11.7--12.5     | 12.1--12.3       | 12.0--12.4       | 11.9--12.6       |
|            | 11.9--12.2     | 11.8--12.3     | 11.7--12.4     | 12.2--12.3       | 12.1--12.4       | 12.0--12.4       |
| 16 years   | 12.0--12.3     | 11.9--12.3     | 11.8--12.5     | 12.1--12.3       | 12.0--12.4       | 11.9--12.6       |
|            | 11.9--12.2     | 11.8--12.3     | 11.7--12.5     | 12.2--12.3       | 12.1--12.4       | 12.0--12.4       |
| 17 years   | 12.0--12.3     | 11.9--12.3     | 11.8--12.5     | 12.1--12.3       | 12.0--12.4       | 11.8--12.6       |
|            | 12.0--12.2     | 12.0--12.4     | 11.9--12.5     | 12.0--12.3       | 12.0--12.6       | 12.0--12.7       |
| 18 years   | 12.0--12.3     | 11.9--12.4     | 11.8--12.5     | 12.1--12.3       | 12.0--12.4       | 11.8--12.6       |
|            | 12.1--12.3     | 12.0--12.4     | 12.0--12.5     | 12.0--12.3       | 12.0--12.5       | 11.7--12.7       |
| 19 years   | 12.0--12.3     | 11.9--12.4     | 11.8--12.5     | 12.1--12.3       | 12.0--12.4       | 11.9--12.6       |
|            | 12.1--12.3     | 12.0--12.3     | 12.0--12.4     | 12.1--12.3       | 12.0--12.5       | 11.7--12.5       |
| 20 years   | 12.0--12.3     | 11.9--12.4     | 11.8--12.5     | 12.1--12.3       | 12.0--12.4       | 11.9--12.6       |
|            | 12.0--12.3     | 12.0--12.3     | 11.9--12.4     | 12.0--12.3       | 12.0--12.4       | 11.9--12.5       |
| 21 years   | 12.0--12.3     | 11.9--12.4     | 11.8--12.5     | 12.1--12.3       | 12.0--12.4       | 11.8--12.6       |
|            | 12.1--12.3     | 12.0--12.3     | 11.9--12.4     | 12.1--12.3       | 12.0--12.3       | 11.9--12.6       |
| 22 years   | 12.0--12.3     | 12.0--12.4     | 11.8--12.5     | 12.1--12.3       | 12.0--12.4       | 11.8--12.6       |
|            | 12.1--12.4     | 11.9--12.4     | 11.8--12.6     | 12.1--12.3       | 12.1--12.3       | 12.0--12.6       |
| 23 years   | 12.0--12.3     | 12.0--12.4     | 11.8--12.5     | 12.1--12.3       | 12.0--12.4       | 11.8--12.6       |
|            | 12.1--12.4     | 12.0--12.5     | 11.8--12.6     | 12.1--12.3       | 12.0--12.4       | 11.9--12.7       |
| 24 years   | 12.0--12.3     | 12.0--12.3     | 11.8--12.5     | 12.1--12.3       | 12.0--12.4       | 11.8--12.6       |
|            | 12.1--12.2     | 12.0--12.3     | 11.9--12.4     | 12.1--12.3       | 11.9--12.4       | 11.8--12.7       |
| 25 years   | 12.0--12.3     | 12.0--12.3     | 11.8--12.5     | 12.1--12.3       | 12.0--12.4       | 11.8--12.6       |
|            | 12.0--12.2     | 11.9--12.3     | 11.9--12.4     | 12.2--12.4       | 12.1--12.4       | 11.9--12.5       |
| 26 years   | 12.0--12.3     | 11.9--12.3     | 11.8--12.5     | 12.1--12.3       | 12.0--12.4       | 11.8--12.6       |
|            | 12.0--12.2     | 11.9--12.3     | 11.8--12.4     | 12.2--12.3       | 12.2--12.4       | 12.0--12.5       |
| 27 years   | 12.0--12.3     | 11.9--12.3     | 11.8--12.5     | 12.1--12.3       | 12.0--12.4       | 11.8--12.6       |
|            | 12.1--12.3     | 12.0--12.3     | 11.8--12.4     | 12.2--12.3       | 12.0--12.5       | 11.8--12.7       |
| 28 years   | 12.0--12.3     | 11.9--12.3     | 11.8--12.5     | 12.1--12.3       | 12.0--12.4       | 11.8--12.6       |
|            | 12.1--12.3     | 12.0--12.4     | 11.9--12.6     | 12.1--12.4       | 11.9--12.5       | 11.8--12.6       |
| 29 years   | 12.0--12.3     | 11.9--12.3     | 11.8--12.5     | 12.1--12.3       | 12.0--12.4       | 11.8--12.6       |
|            | 12.1--12.3     | 12.0--12.3     | 11.8--12.5     | 12.1--12.4       | 11.9--12.5       | 11.8--12.5       |
| 30 years   | 12.0--12.3     | 11.9--12.3     | 11.8--12.5     | 12.1--12.3       | 12.0--12.4       | 11.8--12.6       |
|            | 12.0--12.3     | 11.9--12.3     | 11.7--12.4     | 12.1--12.4       | 12.0--12.4       | 11.7--12.5       |
| 31 years   | 12.0--12.2     | 11.9--12.3     | 11.8--12.5     | 12.1--12.3       | 12.0--12.4       | 11.8--12.6       |
|            | 12.0--12.2     | 11.9--12.3     | 11.7--12.5     | 12.1--12.3       | 12.1--12.4       | 11.9--12.5       |
| 32 years   | 12.0--12.2     | 11.9--12.3     | 11.8--12.5     | 12.1--12.3       | 12.0--12.4       | 11.8--12.6       |
|            | 12.1--12.2     | 12.0--12.3     | 11.9--12.5     | 12.1--12.4       | 12.1--12.4       | 12.0--12.5       |
| 33 years   | 12.0--12.2     | 11.9--12.3     | 11.8--12.5     | 12.1--12.3       | 12.0--12.4       | 11.8--12.5       |
|            | 12.0--12.2     | 12.0--12.4     | 11.8--12.5     | 12.1--12.3       | 12.1--12.4       | 11.9--12.5       |
| 34 years   | 12.0--12.2     | 11.9--12.3     | 11.8--12.4     | 12.1--12.3       | 12.0--12.4       | 11.8--12.5       |



|            |                          |                          |                          |                          |                          |                          |
|------------|--------------------------|--------------------------|--------------------------|--------------------------|--------------------------|--------------------------|
| 59 years   | 11.9--12.1<br>12.0--12.1 | 11.8--12.2<br>11.9--12.2 | 11.8--12.3<br>11.7--12.3 | 12.0--12.2<br>12.0--12.2 | 11.9--12.3<br>11.9--12.3 | 11.8--12.4<br>11.8--12.4 |
| 60 years   | 11.9--12.1<br>11.9--12.1 | 11.8--12.2<br>11.9--12.2 | 11.7--12.3<br>11.8--12.2 | 11.9--12.2<br>12.0--12.2 | 11.9--12.3<br>11.9--12.3 | 11.8--12.4<br>11.8--12.4 |
| 61 years   | 11.9--12.1<br>11.9--12.1 | 11.8--12.2<br>11.8--12.2 | 11.7--12.3<br>11.7--12.2 | 11.9--12.2<br>11.9--12.2 | 11.9--12.3<br>11.9--12.3 | 11.8--12.4<br>11.8--12.3 |
| 62 years   | 11.9--12.1<br>11.9--12.1 | 11.8--12.2<br>11.8--12.1 | 11.7--12.3<br>11.7--12.2 | 11.9--12.2<br>11.9--12.2 | 11.8--12.3<br>11.8--12.2 | 11.8--12.4<br>11.8--12.3 |
| 63 years   | 11.9--12.1<br>11.9--12.1 | 11.8--12.2<br>11.9--12.1 | 11.7--12.3<br>11.8--12.2 | 11.9--12.2<br>12.0--12.1 | 11.8--12.2<br>11.9--12.2 | 11.8--12.4<br>11.8--12.4 |
| 64 years   | 11.9--12.1<br>11.9--12.1 | 11.8--12.2<br>11.8--12.2 | 11.7--12.3<br>11.8--12.2 | 11.9--12.2<br>11.9--12.1 | 11.8--12.2<br>11.9--12.3 | 11.8--12.4<br>11.8--12.4 |
| 65 years   | 11.9--12.1<br>11.9--12.1 | 11.8--12.2<br>11.8--12.2 | 11.7--12.3<br>11.8--12.3 | 11.9--12.2<br>11.9--12.1 | 11.8--12.2<br>11.8--12.2 | 11.8--12.4<br>11.8--12.4 |
| 66 years   | 11.9--12.1<br>11.8--12.0 | 11.8--12.2<br>11.8--12.1 | 11.7--12.3<br>11.8--12.2 | 11.9--12.1<br>11.9--12.1 | 11.8--12.2<br>11.8--12.1 | 11.8--12.3<br>11.8--12.3 |
| 67 years   | 11.9--12.1<br>11.9--12.1 | 11.8--12.2<br>11.8--12.1 | 11.7--12.3<br>11.7--12.2 | 11.9--12.1<br>11.9--12.1 | 11.8--12.2<br>11.8--12.1 | 11.8--12.3<br>11.7--12.2 |
| 68 years   | 11.9--12.1<br>11.9--12.1 | 11.8--12.2<br>11.8--12.2 | 11.7--12.3<br>11.7--12.2 | 11.9--12.1<br>11.9--12.2 | 11.8--12.2<br>11.8--12.2 | 11.7--12.3<br>11.7--12.2 |
| 69 years   | 11.9--12.1<br>11.9--12.1 | 11.8--12.2<br>11.8--12.1 | 11.7--12.3<br>11.7--12.3 | 11.9--12.1<br>11.9--12.2 | 11.8--12.2<br>11.8--12.2 | 11.8--12.3<br>11.7--12.3 |
| 70 years   | 11.9--12.1<br>11.9--12.1 | 11.8--12.2<br>11.8--12.1 | 11.7--12.3<br>11.5--12.3 | 11.9--12.2<br>11.9--12.1 | 11.9--12.2<br>11.9--12.2 | 11.8--12.3<br>11.7--12.4 |
| 71 years   | 11.9--12.1<br>12.0--12.1 | 11.8--12.2<br>11.9--12.2 | 11.7--12.3<br>11.7--12.2 | 11.9--12.2<br>12.0--12.2 | 11.9--12.2<br>11.9--12.3 | 11.8--12.3<br>11.8--12.6 |
| 72 years   | 11.9--12.1<br>12.0--12.1 | 11.8--12.2<br>11.9--12.2 | 11.7--12.3<br>11.8--12.2 | 11.9--12.2<br>12.0--12.2 | 11.9--12.2<br>11.9--12.2 | 11.8--12.3<br>11.7--12.3 |
| 73 years   | 11.9--12.1<br>11.9--12.1 | 11.8--12.2<br>11.8--12.2 | 11.7--12.3<br>11.7--12.2 | 12.0--12.1<br>12.0--12.2 | 11.9--12.2<br>12.0--12.3 | 11.8--12.3<br>11.7--12.3 |
| 74 years   | 11.9--12.1<br>11.9--12.1 | 11.8--12.2<br>11.8--12.2 | 11.7--12.3<br>11.7--12.2 | 12.0--12.1<br>12.0--12.1 | 11.9--12.2<br>12.0--12.2 | 11.8--12.3<br>12.0--12.3 |
| 75 years   | 11.9--12.1<br>11.9--12.2 | 11.8--12.2<br>11.9--12.2 | 11.6--12.3<br>11.8--12.3 | 12.0--12.2<br>12.0--12.1 | 11.9--12.2<br>11.9--12.1 | 11.8--12.3<br>11.8--12.4 |
| 76 years   | 11.9--12.1<br>11.9--12.2 | 11.8--12.2<br>11.8--12.2 | 11.6--12.3<br>11.7--12.2 | 12.0--12.1<br>11.9--12.2 | 11.9--12.2<br>11.9--12.3 | 11.8--12.3<br>11.8--12.4 |
| 77 years   | 11.9--12.1<br>11.9--12.1 | 11.8--12.2<br>11.8--12.2 | 11.6--12.3<br>11.8--12.2 | 12.0--12.1<br>11.9--12.2 | 11.9--12.2<br>11.9--12.2 | 11.8--12.3<br>11.8--12.3 |
| 78 years   | 11.9--12.1<br>11.9--12.1 | 11.8--12.2<br>11.9--12.2 | 11.6--12.2<br>11.9--12.4 | 12.0--12.1<br>11.9--12.0 | 11.9--12.2<br>11.9--12.1 | 11.8--12.3<br>11.8--12.1 |
| 79 years   | 11.9--12.1<br>11.9--12.0 | 11.8--12.2<br>11.8--12.1 | 11.6--12.2<br>11.6--12.3 | 12.0--12.1<br>12.0--12.1 | 11.9--12.2<br>12.0--12.1 | 11.8--12.3<br>12.0--12.1 |
| 80 years   | 11.9--12.1<br>11.8--12.0 | 11.8--12.2<br>11.7--12.1 | 11.6--12.2<br>11.5--12.2 | 11.9--12.1<br>11.9--12.1 | 11.9--12.2<br>11.8--12.2 | 11.8--12.3<br>11.7--12.2 |
| > 80 years | N/A                      | N/A                      | N/A                      | N/A                      | N/A                      | N/A                      |



Table S11. Age norm lookup table for spindle duration (s) during N2 at central channel. In each cell, the first row is from smoothed value, the second row is from unsmoothed value (actual data). 5 to 11 months and > 80 years are not applicable since they are not present in the dataset.

| Age            | Male 50% range | Male 75% range | Male 95% range | Female 50% range | Female 75% range | Female 95% range |
|----------------|----------------|----------------|----------------|------------------|------------------|------------------|
| 0.5 months     | 0.9--1.4       | 0.8--1.6       | 0.7--1.9       | 0.9--1.4         | 0.8--1.6         | 0.7--1.9         |
|                | 0.9--1.5       | 0.8--1.6       | 0.7--1.8       | 0.9--1.5         | 0.8--1.6         | 0.7--1.8         |
| 1 months       | 0.8--1.3       | 0.8--1.5       | 0.7--1.8       | 0.8--1.3         | 0.8--1.5         | 0.7--1.8         |
|                | 0.8--1.4       | 0.8--1.5       | 0.7--1.8       | 0.8--1.4         | 0.8--1.5         | 0.7--1.8         |
| 1.5 months     | 0.8--1.2       | 0.8--1.4       | 0.7--1.8       | 0.8--1.2         | 0.8--1.4         | 0.7--1.8         |
|                | 0.8--0.9       | 0.8--1.2       | 0.7--1.6       | 0.8--0.9         | 0.8--1.2         | 0.7--1.6         |
| 2 months       | 0.8--1.0       | 0.7--1.3       | 0.7--1.7       | 0.8--1.0         | 0.7--1.3         | 0.7--1.7         |
|                | 0.8--0.9       | 0.7--1.3       | 0.7--1.7       | 0.8--0.9         | 0.7--1.3         | 0.7--1.7         |
| 2.5 months     | 0.8--0.9       | 0.7--1.2       | 0.7--1.6       | 0.8--0.9         | 0.7--1.2         | 0.7--1.6         |
|                | 0.8--0.9       | 0.8--1.2       | 0.7--1.6       | 0.8--0.9         | 0.8--1.2         | 0.7--1.6         |
| 3 months       | 0.8--0.8       | 0.8--1.2       | 0.7--1.5       | 0.8--0.8         | 0.8--1.2         | 0.7--1.5         |
|                | 0.8--0.9       | 0.8--1.1       | 0.7--1.3       | 0.8--0.9         | 0.8--1.1         | 0.7--1.3         |
| 3.5 months     | 0.8--0.9       | 0.8--1.2       | 0.7--1.5       | 0.8--0.9         | 0.8--1.2         | 0.7--1.5         |
|                | 0.8--1.3       | 0.8--1.3       | 0.7--1.5       | 0.8--1.3         | 0.8--1.3         | 0.7--1.5         |
| 4 months       | 0.8--0.9       | 0.8--1.2       | 0.7--1.5       | 0.8--0.9         | 0.8--1.2         | 0.7--1.5         |
|                | 1.3--1.4       | 0.9--1.6       | 0.8--1.8       | 1.3--1.4         | 0.9--1.6         | 0.8--1.8         |
| 5 to 11 months | N/A            | N/A            | N/A            | N/A              | N/A              | N/A              |
| 1 years        | 0.9--1.1       | 0.9--1.2       | 0.8--1.3       | 0.9--1.1         | 0.9--1.2         | 0.8--1.3         |
|                | 0.9--1.1       | 0.9--1.3       | 0.8--1.5       | 0.9--1.1         | 0.8--1.3         | 0.8--1.7         |
| 2 years        | 0.9--1.1       | 0.9--1.2       | 0.8--1.4       | 0.9--1.1         | 0.9--1.2         | 0.8--1.4         |
|                | 0.9--1.0       | 0.9--1.2       | 0.8--1.3       | 0.9--1.0         | 0.8--1.1         | 0.7--1.2         |
| 3 years        | 0.9--1.2       | 0.9--1.2       | 0.8--1.4       | 0.9--1.1         | 0.9--1.2         | 0.8--1.4         |
|                | 0.9--1.2       | 0.9--1.3       | 0.8--1.4       | 0.9--1.1         | 0.9--1.2         | 0.8--1.4         |
| 4 years        | 1.0--1.2       | 0.9--1.2       | 0.8--1.4       | 0.9--1.2         | 0.9--1.3         | 0.8--1.4         |
|                | 1.0--1.2       | 0.9--1.2       | 0.8--1.3       | 0.9--1.2         | 0.9--1.2         | 0.8--1.4         |
| 5 years        | 1.0--1.2       | 0.9--1.3       | 0.8--1.4       | 1.0--1.2         | 0.9--1.3         | 0.8--1.4         |
|                | 1.0--1.2       | 0.9--1.3       | 0.8--1.4       | 1.0--1.2         | 0.9--1.3         | 0.8--1.4         |
| 6 years        | 1.0--1.2       | 0.9--1.3       | 0.8--1.4       | 1.0--1.2         | 0.9--1.3         | 0.8--1.4         |
|                | 1.0--1.2       | 0.9--1.3       | 0.8--1.4       | 1.0--1.3         | 0.9--1.4         | 0.7--1.4         |
| 7 years        | 1.0--1.2       | 0.9--1.3       | 0.8--1.4       | 1.0--1.2         | 0.9--1.3         | 0.8--1.4         |
|                | 1.0--1.2       | 0.9--1.2       | 0.9--1.4       | 1.0--1.2         | 0.9--1.3         | 0.8--1.4         |
| 8 years        | 1.0--1.2       | 0.9--1.3       | 0.8--1.4       | 1.0--1.2         | 0.9--1.3         | 0.8--1.4         |
|                | 1.0--1.2       | 0.9--1.2       | 0.8--1.3       | 1.0--1.2         | 1.0--1.3         | 0.9--1.3         |
| 9 years        | 1.0--1.2       | 0.9--1.2       | 0.8--1.4       | 1.0--1.2         | 0.9--1.3         | 0.8--1.4         |
|                | 1.0--1.2       | 0.9--1.3       | 0.7--1.4       | 1.0--1.2         | 0.9--1.3         | 0.9--1.3         |
| 10 years       | 1.0--1.2       | 0.9--1.2       | 0.8--1.4       | 1.0--1.2         | 0.9--1.3         | 0.8--1.3         |
|                | 1.0--1.2       | 1.0--1.3       | 0.7--1.4       | 1.0--1.2         | 0.9--1.2         | 0.8--1.3         |
| 11 years       | 1.0--1.2       | 0.9--1.2       | 0.8--1.4       | 1.0--1.2         | 0.9--1.3         | 0.8--1.3         |
|                | 1.0--1.2       | 0.9--1.2       | 0.9--1.4       | 1.0--1.2         | 1.0--1.2         | 0.9--1.3         |
| 12 years       | 1.0--1.2       | 0.9--1.2       | 0.8--1.4       | 1.0--1.2         | 0.9--1.2         | 0.8--1.3         |
|                | 0.9--1.1       | 0.9--1.2       | 0.8--1.3       | 1.0--1.2         | 1.0--1.3         | 0.9--1.3         |
| 13 years       | 0.9--1.2       | 0.9--1.2       | 0.8--1.3       | 1.0--1.2         | 0.9--1.2         | 0.8--1.3         |
|                | 0.9--1.1       | 0.9--1.2       | 0.7--1.3       | 1.0--1.2         | 0.9--1.2         | 0.8--1.3         |
| 14 years       | 0.9--1.1       | 0.9--1.2       | 0.8--1.3       | 1.0--1.2         | 0.9--1.2         | 0.8--1.3         |

|          |                      |                      |                      |                      |                      |                      |
|----------|----------------------|----------------------|----------------------|----------------------|----------------------|----------------------|
|          | 0.9--1.2             | 0.9--1.2             | 0.8--1.3             | 0.9--1.1             | 0.9--1.2             | 0.8--1.2             |
| 15 years | 0.9--1.1<br>1.0--1.1 | 0.9--1.2<br>1.0--1.2 | 0.8--1.3<br>0.9--1.3 | 0.9--1.1<br>1.0--1.2 | 0.9--1.2<br>0.9--1.2 | 0.8--1.3<br>0.8--1.3 |
| 16 years | 0.9--1.1<br>1.0--1.2 | 0.9--1.2<br>0.9--1.2 | 0.8--1.3<br>0.8--1.3 | 0.9--1.1<br>1.0--1.2 | 0.9--1.2<br>0.9--1.2 | 0.8--1.3<br>0.8--1.3 |
| 17 years | 0.9--1.1<br>0.9--1.1 | 0.9--1.2<br>0.9--1.2 | 0.8--1.3<br>0.8--1.2 | 0.9--1.1<br>0.9--1.1 | 0.9--1.2<br>0.9--1.2 | 0.8--1.2<br>0.8--1.2 |
| 18 years | 0.9--1.1<br>0.9--1.0 | 0.9--1.1<br>0.8--1.0 | 0.8--1.3<br>0.8--1.4 | 0.9--1.1<br>0.9--1.0 | 0.8--1.1<br>0.8--1.1 | 0.8--1.2<br>0.8--1.2 |
| 19 years | 0.9--1.0<br>0.9--1.0 | 0.8--1.1<br>0.9--1.1 | 0.8--1.3<br>0.8--1.5 | 0.9--1.0<br>0.9--1.0 | 0.8--1.1<br>0.8--1.1 | 0.8--1.2<br>0.8--1.2 |
| 20 years | 0.9--1.0<br>0.8--0.9 | 0.8--1.1<br>0.8--1.1 | 0.8--1.2<br>0.8--1.1 | 0.9--1.0<br>0.9--1.0 | 0.8--1.0<br>0.8--1.1 | 0.8--1.2<br>0.7--1.2 |
| 21 years | 0.9--1.0<br>0.8--0.9 | 0.8--1.0<br>0.8--1.0 | 0.8--1.2<br>0.8--1.3 | 0.9--1.0<br>0.8--1.0 | 0.8--1.0<br>0.8--1.0 | 0.8--1.2<br>0.7--1.1 |
| 22 years | 0.9--1.0<br>0.8--1.0 | 0.8--1.0<br>0.8--1.0 | 0.8--1.2<br>0.8--1.3 | 0.8--1.0<br>0.9--1.0 | 0.8--1.0<br>0.8--1.0 | 0.8--1.2<br>0.8--1.1 |
| 23 years | 0.9--1.0<br>0.9--0.9 | 0.8--1.0<br>0.8--1.0 | 0.8--1.2<br>0.8--1.1 | 0.8--1.0<br>0.9--1.0 | 0.8--1.0<br>0.8--1.0 | 0.8--1.2<br>0.8--1.1 |
| 24 years | 0.9--1.0<br>0.9--0.9 | 0.8--1.0<br>0.8--1.0 | 0.8--1.2<br>0.8--1.0 | 0.8--1.0<br>0.8--0.9 | 0.8--1.0<br>0.8--1.0 | 0.8--1.2<br>0.7--1.0 |
| 25 years | 0.8--1.0<br>0.9--1.0 | 0.8--1.0<br>0.8--1.0 | 0.8--1.2<br>0.8--1.0 | 0.8--1.0<br>0.8--0.9 | 0.8--1.0<br>0.8--1.0 | 0.8--1.2<br>0.7--1.0 |
| 26 years | 0.8--0.9<br>0.8--1.0 | 0.8--1.0<br>0.8--1.0 | 0.8--1.1<br>0.8--1.1 | 0.8--0.9<br>0.8--0.9 | 0.8--1.0<br>0.8--1.0 | 0.8--1.1<br>0.7--1.0 |
| 27 years | 0.8--0.9<br>0.8--0.9 | 0.8--1.0<br>0.8--1.0 | 0.8--1.1<br>0.8--1.0 | 0.8--0.9<br>0.8--1.0 | 0.8--1.0<br>0.8--1.0 | 0.8--1.1<br>0.8--1.1 |
| 28 years | 0.8--0.9<br>0.8--1.0 | 0.8--1.0<br>0.8--1.0 | 0.7--1.1<br>0.7--1.1 | 0.8--0.9<br>0.9--1.0 | 0.8--1.0<br>0.8--1.0 | 0.8--1.1<br>0.8--1.1 |
| 29 years | 0.8--0.9<br>0.8--1.0 | 0.8--1.0<br>0.8--1.0 | 0.7--1.1<br>0.8--1.1 | 0.8--0.9<br>0.8--0.9 | 0.8--1.0<br>0.8--1.0 | 0.8--1.1<br>0.8--1.0 |
| 30 years | 0.8--0.9<br>0.8--0.9 | 0.8--1.0<br>0.8--1.0 | 0.7--1.1<br>0.7--1.0 | 0.8--0.9<br>0.8--0.9 | 0.8--1.0<br>0.8--0.9 | 0.8--1.1<br>0.7--1.1 |
| 31 years | 0.8--0.9<br>0.8--0.9 | 0.8--1.0<br>0.8--1.0 | 0.7--1.1<br>0.7--1.0 | 0.8--0.9<br>0.8--0.9 | 0.8--1.0<br>0.8--1.0 | 0.8--1.1<br>0.7--1.1 |
| 32 years | 0.8--0.9<br>0.9--0.9 | 0.8--1.0<br>0.8--1.0 | 0.7--1.1<br>0.8--1.1 | 0.8--0.9<br>0.8--0.9 | 0.8--1.0<br>0.8--1.0 | 0.8--1.1<br>0.7--1.0 |
| 33 years | 0.8--0.9<br>0.8--0.9 | 0.8--1.0<br>0.8--0.9 | 0.7--1.1<br>0.7--1.1 | 0.8--0.9<br>0.8--0.9 | 0.8--1.0<br>0.8--1.0 | 0.8--1.1<br>0.8--1.0 |
| 34 years | 0.8--0.9<br>0.8--0.9 | 0.8--1.0<br>0.8--0.9 | 0.7--1.0<br>0.7--1.1 | 0.8--0.9<br>0.8--0.9 | 0.8--1.0<br>0.8--1.0 | 0.8--1.1<br>0.8--1.0 |
| 35 years | 0.8--0.9<br>0.8--0.9 | 0.8--1.0<br>0.8--1.0 | 0.7--1.0<br>0.8--1.1 | 0.8--0.9<br>0.8--0.9 | 0.8--1.0<br>0.8--0.9 | 0.8--1.1<br>0.8--1.1 |
| 36 years | 0.8--0.9<br>0.8--0.9 | 0.8--1.0<br>0.8--1.0 | 0.7--1.0<br>0.8--1.1 | 0.8--0.9<br>0.8--0.9 | 0.8--1.0<br>0.8--1.0 | 0.8--1.1<br>0.8--1.1 |
| 37 years | 0.8--0.9<br>0.8--0.9 | 0.8--1.0<br>0.7--0.9 | 0.7--1.0<br>0.7--1.0 | 0.8--0.9<br>0.8--0.9 | 0.8--1.0<br>0.8--1.0 | 0.8--1.1<br>0.7--1.1 |
| 38 years | 0.8--0.9<br>0.8--0.9 | 0.8--1.0<br>0.8--1.0 | 0.7--1.0<br>0.7--1.0 | 0.8--0.9<br>0.8--0.9 | 0.8--1.0<br>0.8--1.0 | 0.8--1.1<br>0.7--1.1 |



|            |                      |                      |                      |                      |                      |                      |
|------------|----------------------|----------------------|----------------------|----------------------|----------------------|----------------------|
| 64 years   | 0.8--0.8<br>0.8--0.9 | 0.7--0.9<br>0.8--0.9 | 0.7--1.0<br>0.7--1.2 | 0.8--0.9<br>0.8--0.8 | 0.7--0.9<br>0.7--0.9 | 0.7--1.0<br>0.7--1.0 |
| 65 years   | 0.8--0.8<br>0.8--0.9 | 0.7--0.9<br>0.7--0.9 | 0.7--1.0<br>0.7--0.9 | 0.8--0.9<br>0.8--0.8 | 0.7--0.9<br>0.7--0.8 | 0.7--1.0<br>0.7--0.9 |
| 66 years   | 0.8--0.8<br>0.8--0.8 | 0.7--0.9<br>0.7--0.9 | 0.7--1.0<br>0.7--1.0 | 0.8--0.9<br>0.8--0.8 | 0.7--0.9<br>0.8--0.9 | 0.7--1.0<br>0.7--0.9 |
| 67 years   | 0.8--0.8<br>0.8--0.8 | 0.7--0.9<br>0.7--0.9 | 0.7--1.0<br>0.7--1.0 | 0.8--0.9<br>0.8--0.8 | 0.7--0.9<br>0.7--0.9 | 0.7--1.0<br>0.7--0.9 |
| 68 years   | 0.8--0.8<br>0.8--0.8 | 0.7--0.9<br>0.7--0.9 | 0.7--1.0<br>0.7--1.0 | 0.8--0.9<br>0.8--0.8 | 0.7--0.9<br>0.7--0.9 | 0.7--1.0<br>0.7--0.9 |
| 69 years   | 0.8--0.8<br>0.7--0.8 | 0.7--0.9<br>0.7--0.9 | 0.7--1.0<br>0.7--0.9 | 0.8--0.9<br>0.8--0.8 | 0.7--0.9<br>0.7--0.9 | 0.7--1.0<br>0.7--0.9 |
| 70 years   | 0.8--0.8<br>0.8--0.8 | 0.7--0.9<br>0.8--0.9 | 0.7--1.0<br>0.7--1.0 | 0.8--0.8<br>0.8--0.9 | 0.7--0.9<br>0.7--0.9 | 0.7--1.0<br>0.7--1.0 |
| 71 years   | 0.8--0.8<br>0.8--0.8 | 0.7--0.9<br>0.8--0.9 | 0.7--1.0<br>0.7--1.0 | 0.8--0.8<br>0.8--0.9 | 0.7--0.9<br>0.7--0.9 | 0.7--1.0<br>0.7--1.1 |
| 72 years   | 0.8--0.8<br>0.8--0.8 | 0.7--0.9<br>0.7--0.9 | 0.7--1.0<br>0.7--1.0 | 0.8--0.8<br>0.8--0.9 | 0.7--0.9<br>0.7--0.9 | 0.7--1.0<br>0.7--1.1 |
| 73 years   | 0.8--0.8<br>0.7--0.9 | 0.7--0.9<br>0.7--0.9 | 0.7--1.0<br>0.7--0.9 | 0.8--0.8<br>0.8--0.9 | 0.7--0.9<br>0.8--0.9 | 0.7--1.0<br>0.7--1.0 |
| 74 years   | 0.8--0.8<br>0.7--0.8 | 0.7--0.9<br>0.7--0.9 | 0.7--1.0<br>0.7--0.9 | 0.8--0.8<br>0.8--0.8 | 0.7--0.9<br>0.8--0.9 | 0.7--1.0<br>0.8--0.9 |
| 75 years   | 0.8--0.8<br>0.7--0.8 | 0.7--0.9<br>0.7--0.8 | 0.7--1.0<br>0.7--0.9 | 0.8--0.8<br>0.8--0.8 | 0.7--0.9<br>0.7--0.9 | 0.7--1.0<br>0.7--0.9 |
| 76 years   | 0.8--0.8<br>0.8--0.8 | 0.7--0.9<br>0.7--0.9 | 0.7--1.0<br>0.7--1.1 | 0.8--0.8<br>0.8--0.9 | 0.7--0.9<br>0.8--0.9 | 0.7--1.0<br>0.7--0.9 |
| 77 years   | 0.8--0.8<br>0.8--0.9 | 0.7--0.9<br>0.8--1.0 | 0.7--1.0<br>0.8--1.2 | 0.8--0.8<br>0.8--0.8 | 0.7--0.9<br>0.8--0.9 | 0.7--1.0<br>0.7--0.9 |
| 78 years   | 0.8--0.8<br>0.8--0.9 | 0.7--0.9<br>0.7--0.9 | 0.7--1.0<br>0.7--0.9 | 0.8--0.8<br>0.8--0.8 | 0.7--0.9<br>0.7--0.8 | 0.7--1.0<br>0.7--0.8 |
| 79 years   | 0.8--0.8<br>0.7--0.8 | 0.7--0.9<br>0.7--0.9 | 0.7--1.0<br>0.7--0.9 | 0.8--0.8<br>0.8--0.8 | 0.7--0.9<br>0.8--0.8 | 0.7--0.9<br>0.8--0.8 |
| 80 years   | 0.7--0.8<br>0.7--0.8 | 0.7--0.9<br>0.7--0.8 | 0.7--0.9<br>0.6--0.9 | 0.8--0.8<br>0.8--0.8 | 0.7--0.9<br>0.7--0.9 | 0.7--0.9<br>0.7--0.9 |
| > 80 years | N/A                  | N/A                  | N/A                  | N/A                  | N/A                  | N/A                  |

Table S12. Age norm lookup table for spindle duration (s) during N2 at frontal channel. In each cell, the first row is from smoothed value, the second row is from unsmoothed value (actual data). < 13 years and > 80 years are not applicable since they are not present in the dataset.

| Age        | Male 50% range       | Male 75% range       | Male 95% range       | Female 50% range     | Female 75% range     | Female 95% range     |
|------------|----------------------|----------------------|----------------------|----------------------|----------------------|----------------------|
| < 13 years | N/A                  | N/A                  | N/A                  | N/A                  | N/A                  | N/A                  |
| 13 years   | 0.9--1.1<br>1.0--1.1 | 0.9--1.1<br>0.9--1.1 | 0.8--1.2<br>0.9--1.1 | 0.9--1.0<br>1.0--1.1 | 0.9--1.1<br>1.0--1.1 | 0.8--1.2<br>1.0--1.1 |
| 14 years   | 0.9--1.1<br>1.0--1.1 | 0.9--1.1<br>1.0--1.1 | 0.8--1.2<br>1.0--1.2 | 0.9--1.0<br>1.0--1.1 | 0.9--1.1<br>0.9--1.2 | 0.8--1.2<br>0.9--1.2 |
| 15 years   | 0.9--1.1<br>1.0--1.1 | 0.9--1.1<br>0.9--1.2 | 0.8--1.2<br>0.7--1.2 | 0.9--1.0<br>1.0--1.1 | 0.9--1.1<br>0.9--1.1 | 0.8--1.2<br>0.9--1.2 |
| 16 years   | 0.9--1.0<br>0.9--1.1 | 0.8--1.1<br>0.9--1.1 | 0.8--1.2<br>0.7--1.2 | 0.9--1.0<br>1.0--1.1 | 0.9--1.1<br>0.9--1.1 | 0.8--1.2<br>0.9--1.2 |
| 17 years   | 0.9--1.0<br>0.9--1.1 | 0.8--1.1<br>0.9--1.1 | 0.8--1.2<br>0.8--1.1 | 0.9--1.0<br>1.0--1.1 | 0.9--1.1<br>1.0--1.1 | 0.8--1.1<br>0.9--1.1 |
| 18 years   | 0.9--1.0<br>0.9--1.1 | 0.8--1.1<br>0.8--1.1 | 0.8--1.2<br>0.8--1.2 | 0.9--1.0<br>0.9--1.0 | 0.9--1.1<br>0.9--1.0 | 0.8--1.1<br>0.8--1.1 |
| 19 years   | 0.9--1.0<br>0.9--1.0 | 0.8--1.1<br>0.8--1.1 | 0.8--1.1<br>0.8--1.1 | 0.9--1.0<br>0.9--1.0 | 0.9--1.1<br>0.9--1.0 | 0.8--1.1<br>0.8--1.0 |
| 20 years   | 0.9--1.0<br>0.9--1.1 | 0.8--1.1<br>0.9--1.1 | 0.8--1.1<br>0.8--1.1 | 0.9--1.0<br>0.9--1.0 | 0.8--1.1<br>0.9--1.1 | 0.8--1.1<br>0.8--1.1 |
| 21 years   | 0.9--1.0<br>0.9--1.0 | 0.8--1.0<br>0.9--1.1 | 0.8--1.1<br>0.8--1.1 | 0.9--1.0<br>0.9--1.0 | 0.8--1.1<br>0.9--1.1 | 0.8--1.1<br>0.8--1.1 |
| 22 years   | 0.9--1.0<br>0.9--1.0 | 0.8--1.0<br>0.9--1.0 | 0.8--1.1<br>0.8--1.1 | 0.9--1.0<br>0.9--1.0 | 0.8--1.0<br>0.8--1.0 | 0.8--1.1<br>0.8--1.1 |
| 23 years   | 0.9--1.0<br>0.9--0.9 | 0.8--1.0<br>0.8--0.9 | 0.8--1.1<br>0.8--1.0 | 0.9--1.0<br>0.9--1.0 | 0.8--1.0<br>0.8--1.0 | 0.8--1.1<br>0.8--1.0 |
| 24 years   | 0.9--1.0<br>0.8--0.9 | 0.8--1.0<br>0.8--1.0 | 0.8--1.1<br>0.8--1.0 | 0.9--1.0<br>0.9--0.9 | 0.8--1.0<br>0.8--1.0 | 0.8--1.1<br>0.8--1.0 |
| 25 years   | 0.9--1.0<br>0.8--1.0 | 0.8--1.0<br>0.8--1.0 | 0.8--1.1<br>0.8--1.0 | 0.9--1.0<br>0.8--1.0 | 0.8--1.0<br>0.8--1.0 | 0.8--1.1<br>0.8--1.1 |
| 26 years   | 0.9--1.0<br>0.8--1.0 | 0.8--1.0<br>0.8--1.0 | 0.8--1.1<br>0.8--1.1 | 0.9--1.0<br>0.8--0.9 | 0.8--1.0<br>0.8--1.0 | 0.8--1.1<br>0.8--1.1 |
| 27 years   | 0.9--1.0<br>0.9--1.0 | 0.8--1.0<br>0.8--1.0 | 0.8--1.1<br>0.8--1.3 | 0.9--1.0<br>0.9--1.0 | 0.8--1.0<br>0.8--1.0 | 0.8--1.1<br>0.8--1.1 |
| 28 years   | 0.8--0.9<br>0.8--0.9 | 0.8--1.0<br>0.8--1.0 | 0.8--1.1<br>0.8--1.1 | 0.9--1.0<br>0.9--1.0 | 0.8--1.0<br>0.8--1.0 | 0.8--1.1<br>0.8--1.1 |
| 29 years   | 0.8--0.9<br>0.9--0.9 | 0.8--1.0<br>0.8--1.0 | 0.8--1.1<br>0.8--1.1 | 0.9--1.0<br>0.9--1.0 | 0.8--1.0<br>0.8--1.0 | 0.8--1.1<br>0.8--1.1 |
| 30 years   | 0.8--0.9<br>0.9--1.0 | 0.8--1.0<br>0.9--1.0 | 0.8--1.1<br>0.8--1.1 | 0.9--1.0<br>0.9--1.0 | 0.8--1.0<br>0.8--1.0 | 0.8--1.1<br>0.8--1.1 |
| 31 years   | 0.8--0.9<br>0.9--0.9 | 0.8--1.0<br>0.8--1.0 | 0.8--1.1<br>0.8--1.0 | 0.8--1.0<br>0.8--0.9 | 0.8--1.0<br>0.8--0.9 | 0.8--1.1<br>0.8--1.0 |
| 32 years   | 0.8--0.9<br>0.8--0.9 | 0.8--1.0<br>0.8--1.0 | 0.8--1.1<br>0.8--1.0 | 0.8--1.0<br>0.8--0.9 | 0.8--1.0<br>0.8--1.0 | 0.8--1.1<br>0.8--1.0 |
| 33 years   | 0.8--0.9<br>0.8--0.9 | 0.8--1.0<br>0.8--1.0 | 0.8--1.1<br>0.8--1.0 | 0.8--0.9<br>0.8--1.0 | 0.8--1.0<br>0.8--1.0 | 0.8--1.1<br>0.8--1.1 |
| 34 years   | 0.8--0.9             | 0.8--1.0             | 0.8--1.1             | 0.8--0.9             | 0.8--1.0             | 0.8--1.1             |





Table S13. Age norm lookup table for spindle amplitude ( $\mu\text{V}$ ) during N2 at central channel. In each cell, the first row is from smoothed value, the second row is from unsmoothed value (actual data). 5 to 11 months and  $\geq 80$  years are not applicable since they are not present in the dataset.

| Age            | Male 50% range | Male 75% range | Male 95% range | Female 50% range | Female 75% range | Female 95% range |
|----------------|----------------|----------------|----------------|------------------|------------------|------------------|
| 0.5 months     | 11.8--20.9     | 10.2--25.1     | 8.2--30.9      | 11.8--20.9       | 10.2--25.1       | 8.2--30.9        |
|                | 12.1--22.1     | 10.2--25.3     | 8.2--30.2      | 12.1--22.1       | 10.2--25.3       | 8.2--30.2        |
| 1 months       | 11.7--20.1     | 10.2--24.4     | 8.2--31.3      | 11.7--20.1       | 10.2--24.4       | 8.2--31.3        |
|                | 12.1--20.5     | 10.7--24.5     | 8.4--30.6      | 12.1--20.5       | 10.7--24.5       | 8.4--30.6        |
| 1.5 months     | 11.6--19.4     | 10.2--23.4     | 8.3--31.1      | 11.6--19.4       | 10.2--23.4       | 8.3--31.1        |
|                | 11.3--18.5     | 10.0--20.6     | 8.2--31.5      | 11.3--18.5       | 10.0--20.6       | 8.2--31.5        |
| 2 months       | 11.6--18.8     | 10.2--21.9     | 8.4--30.1      | 11.6--18.8       | 10.2--21.9       | 8.4--30.1        |
|                | 11.5--18.8     | 10.0--20.6     | 8.5--26.0      | 11.5--18.8       | 10.0--20.6       | 8.5--26.0        |
| 2.5 months     | 11.6--18.3     | 10.1--20.0     | 8.5--28.5      | 11.6--18.3       | 10.1--20.0       | 8.5--28.5        |
|                | 11.8--17.7     | 10.6--20.5     | 9.2--28.5      | 11.8--17.7       | 10.6--20.5       | 9.2--28.5        |
| 3 months       | 12.2--18.8     | 10.7--20.4     | 8.9--28.9      | 12.2--18.9       | 10.7--20.4       | 9.1--29.1        |
|                | 12.8--17.9     | 11.1--20.6     | 9.0--26.4      | 12.8--17.9       | 11.1--20.6       | 9.0--26.4        |
| 3.5 months     | 13.0--19.6     | 11.4--21.3     | 9.4--29.9      | 12.9--19.9       | 11.4--21.4       | 9.7--30.4        |
|                | 15.7--21.2     | 14.6--23.1     | 11.9--50.8     | 15.7--21.2       | 14.6--23.1       | 11.9--50.8       |
| 4 months       | 13.7--20.4     | 12.1--22.2     | 9.9--30.9      | 13.7--20.8       | 12.1--22.4       | 10.3--31.7       |
|                | 18.2--25.2     | 16.6--39.1     | 15.8--56.7     | 18.2--25.2       | 16.6--39.1       | 15.8--56.7       |
| 5 to 11 months | N/A            | N/A            | N/A            | N/A              | N/A              | N/A              |
| 1 years        | 25.8--32.8     | 23.2--37.2     | 17.6--47.5     | 25.7--35.8       | 23.3--38.5       | 20.4--52.5       |
|                | 26.5--32.7     | 23.2--36.3     | 20.7--39.4     | 22.8--31.0       | 22.1--35.0       | 19.3--46.1       |
| 2 years        | 26.0--33.4     | 23.2--38.2     | 18.5--48.2     | 26.1--36.3       | 23.5--41.0       | 20.3--53.7       |
|                | 26.3--32.6     | 23.7--38.1     | 15.3--44.8     | 26.4--32.8       | 24.6--38.2       | 21.5--49.0       |
| 3 years        | 26.1--34.0     | 23.3--39.1     | 19.1--49.1     | 26.3--36.6       | 23.5--42.7       | 20.2--54.8       |
|                | 26.1--33.2     | 24.9--38.4     | 21.8--51.5     | 27.0--38.9       | 23.8--42.2       | 20.0--53.8       |
| 4 years        | 26.2--34.7     | 23.3--40.1     | 19.6--50.0     | 26.4--37.0       | 23.5--43.8       | 20.1--55.7       |
|                | 23.7--33.5     | 22.0--39.7     | 19.6--47.5     | 25.6--35.3       | 24.5--36.3       | 23.3--37.2       |
| 5 years        | 26.3--35.4     | 23.3--41.1     | 19.9--51.0     | 26.4--37.2       | 23.5--44.6       | 20.0--56.4       |
|                | 26.8--34.7     | 22.8--38.2     | 20.6--44.5     | 27.2--41.4       | 24.7--49.8       | 20.2--58.2       |
| 6 years        | 26.3--36.1     | 23.3--42.0     | 20.0--52.1     | 26.3--37.5       | 23.3--45.3       | 19.9--57.0       |
|                | 26.9--35.5     | 23.3--39.6     | 20.7--47.1     | 27.9--39.8       | 24.4--49.4       | 19.4--54.5       |
| 7 years        | 26.3--36.9     | 23.3--43.0     | 20.0--53.2     | 26.2--37.7       | 22.9--45.7       | 19.8--57.4       |
|                | 27.3--37.6     | 25.1--43.2     | 22.9--55.8     | 28.9--38.9       | 25.1--45.6       | 21.9--51.7       |
| 8 years        | 26.3--37.8     | 23.2--44.0     | 19.7--54.4     | 26.1--37.9       | 22.3--46.0       | 19.7--57.3       |
|                | 27.8--41.3     | 26.3--47.8     | 22.8--64.5     | 26.7--38.5       | 24.2--47.2       | 21.9--51.1       |
| 9 years        | 26.3--38.6     | 23.2--44.9     | 19.3--55.5     | 26.0--38.0       | 21.5--46.2       | 19.6--56.9       |
|                | 28.7--42.7     | 25.7--48.9     | 20.2--64.7     | 24.6--33.6       | 22.5--45.3       | 18.3--52.3       |
| 10 years       | 26.2--39.2     | 23.1--45.6     | 18.9--56.4     | 26.0--38.1       | 21.4--46.2       | 19.5--56.0       |
|                | 28.6--44.0     | 23.3--49.1     | 19.6--53.5     | 21.9--35.4       | 20.5--56.0       | 17.8--62.1       |
| 11 years       | 26.1--39.6     | 23.1--46.0     | 18.6--56.9     | 26.0--38.2       | 21.8--46.0       | 19.4--54.8       |
|                | 26.7--35.4     | 22.3--44.6     | 15.2--50.5     | 22.1--44.3       | 21.0--55.9       | 17.4--62.7       |
| 12 years       | 26.0--39.7     | 23.0--46.1     | 18.4--57.1     | 26.0--38.3       | 22.4--45.7       | 19.3--53.4       |
|                | 23.9--35.5     | 21.0--44.5     | 15.2--58.5     | 25.3--36.7       | 22.2--42.5       | 18.7--47.1       |
| 13 years       | 25.9--39.5     | 23.0--45.9     | 18.2--56.8     | 26.1--38.3       | 23.0--45.2       | 19.2--52.1       |
|                | 24.3--39.5     | 20.6--46.9     | 17.6--60.7     | 25.4--35.2       | 21.4--41.6       | 18.5--44.0       |
| 14 years       | 25.7--39.1     | 23.0--45.4     | 18.0--56.2     | 26.2--38.3       | 23.5--44.6       | 19.1--50.7       |



|          |                          |                          |                          |                          |                          |                          |
|----------|--------------------------|--------------------------|--------------------------|--------------------------|--------------------------|--------------------------|
|          | 25.5--37.9               | 20.1--42.4               | 17.6--55.3               | 28.3--38.1               | 25.5--42.9               | 19.7--44.4               |
| 15 years | 25.6--38.5<br>31.6--44.2 | 22.8--44.6<br>28.1--47.3 | 17.9--55.3<br>22.1--49.8 | 26.3--38.2<br>27.9--38.3 | 24.1--43.8<br>26.1--44.0 | 19.0--49.3<br>24.8--45.3 |
| 16 years | 25.4--37.5<br>34.9--46.0 | 22.6--43.5<br>30.5--49.0 | 17.7--54.0<br>21.4--51.0 | 26.5--38.1<br>30.9--39.4 | 24.5--43.0<br>26.7--44.0 | 18.9--48.0<br>24.8--45.3 |
| 17 years | 25.2--36.4<br>27.9--34.0 | 22.2--42.1<br>25.9--37.2 | 17.4--52.3<br>24.0--47.8 | 26.5--38.0<br>33.0--39.6 | 24.7--42.2<br>27.0--42.5 | 18.8--47.2<br>20.2--60.6 |
| 18 years | 25.0--35.0<br>25.4--31.5 | 21.7--40.5<br>23.5--33.0 | 17.1--50.2<br>21.4--37.0 | 26.5--37.9<br>27.5--39.4 | 24.6--41.4<br>22.2--42.9 | 18.8--46.9<br>19.5--54.1 |
| 19 years | 24.8--33.5<br>24.9--28.6 | 21.2--38.7<br>24.2--32.8 | 16.9--48.1<br>21.5--40.4 | 26.3--37.7<br>26.6--37.5 | 24.3--40.8<br>24.7--39.1 | 18.7--47.1<br>19.6--42.1 |
| 20 years | 24.6--32.1<br>23.9--30.1 | 20.8--37.1<br>20.0--37.8 | 16.6--46.1<br>16.8--41.8 | 26.1--37.5<br>24.8--36.5 | 23.7--40.2<br>22.0--39.5 | 18.6--47.8<br>17.6--42.3 |
| 21 years | 24.4--31.0<br>22.4--28.6 | 20.4--35.7<br>17.4--33.2 | 16.4--44.4<br>16.8--41.6 | 25.8--37.3<br>22.9--34.3 | 23.0--39.6<br>21.0--39.9 | 18.5--48.6<br>17.6--50.5 |
| 22 years | 24.1--30.0<br>20.9--28.8 | 20.0--34.5<br>18.2--33.5 | 16.2--42.9<br>17.5--44.5 | 25.5--37.0<br>22.8--31.6 | 22.5--39.2<br>19.0--38.2 | 18.4--49.2<br>16.9--55.6 |
| 23 years | 23.9--29.1<br>20.4--25.9 | 19.7--33.4<br>18.3--29.5 | 16.0--41.6<br>13.4--44.5 | 25.3--36.7<br>23.8--33.6 | 22.2--38.8<br>20.7--38.7 | 18.3--49.7<br>16.9--50.3 |
| 24 years | 23.6--28.4<br>20.7--28.2 | 19.4--32.6<br>17.1--30.3 | 15.9--40.5<br>13.2--35.3 | 25.1--36.4<br>25.8--34.4 | 21.9--38.5<br>22.8--36.9 | 18.2--49.9<br>22.3--48.8 |
| 25 years | 23.3--27.9<br>22.9--30.1 | 19.2--31.9<br>20.0--30.9 | 15.8--39.6<br>15.6--35.6 | 24.8--36.0<br>24.2--33.8 | 21.8--38.2<br>21.8--37.0 | 18.1--50.1<br>18.4--44.6 |
| 26 years | 23.0--27.5<br>21.8--26.5 | 19.0--31.5<br>19.2--29.4 | 15.7--39.0<br>18.2--31.1 | 24.6--35.6<br>25.2--35.1 | 21.8--38.0<br>21.9--40.0 | 18.0--50.2<br>18.4--49.9 |
| 27 years | 22.7--27.4<br>20.1--26.5 | 18.9--31.2<br>18.5--29.8 | 15.7--38.6<br>17.3--33.0 | 24.5--35.3<br>26.3--34.8 | 21.7--37.7<br>24.0--39.2 | 18.0--50.2<br>21.9--50.0 |
| 28 years | 22.3--27.3<br>21.8--30.4 | 18.9--31.1<br>18.8--32.0 | 15.7--38.4<br>17.1--36.1 | 24.3--35.0<br>25.1--30.7 | 21.6--37.5<br>22.9--35.9 | 17.9--50.2<br>21.1--38.8 |
| 29 years | 22.0--27.3<br>24.0--31.1 | 18.8--31.0<br>19.2--33.5 | 15.7--38.2<br>17.2--38.7 | 24.1--34.7<br>25.6--35.9 | 21.5--37.3<br>23.0--38.6 | 17.8--50.2<br>19.7--42.8 |
| 30 years | 21.7--27.3<br>21.2--30.6 | 18.7--30.9<br>17.4--33.8 | 15.7--38.0<br>16.3--38.3 | 23.9--34.4<br>25.1--35.3 | 21.4--37.2<br>23.1--39.3 | 17.7--50.2<br>20.2--45.2 |
| 31 years | 21.4--27.2<br>20.2--28.2 | 18.6--30.8<br>17.7--31.7 | 15.7--37.9<br>14.4--37.9 | 23.8--34.1<br>24.6--31.6 | 21.3--37.0<br>22.1--36.6 | 17.6--50.1<br>21.2--53.7 |
| 32 years | 21.1--27.2<br>20.6--26.7 | 18.6--30.7<br>17.8--29.3 | 15.6--37.7<br>15.2--51.4 | 23.6--33.8<br>23.6--31.7 | 21.2--36.8<br>22.0--35.3 | 17.5--50.0<br>20.9--57.2 |
| 33 years | 20.8--27.2<br>19.8--26.7 | 18.5--30.6<br>17.8--29.0 | 15.6--37.5<br>15.3--42.3 | 23.5--33.5<br>23.3--33.8 | 21.1--36.7<br>21.9--37.1 | 17.4--49.9<br>18.6--57.2 |
| 34 years | 20.5--27.1<br>19.8--25.5 | 18.4--30.5<br>18.0--27.5 | 15.5--37.4<br>16.7--32.5 | 23.3--33.3<br>23.6--32.5 | 21.0--36.6<br>22.0--38.3 | 17.4--49.7<br>18.5--50.5 |
| 35 years | 20.3--27.1<br>19.5--24.9 | 18.3--30.3<br>16.7--27.7 | 15.5--37.2<br>15.4--34.8 | 23.2--33.0<br>24.2--32.6 | 20.9--36.5<br>22.9--39.0 | 17.3--49.5<br>18.9--52.2 |
| 36 years | 20.0--27.0<br>19.3--26.1 | 18.2--30.2<br>16.4--31.3 | 15.4--37.0<br>15.3--37.1 | 23.1--32.8<br>23.6--33.3 | 20.9--36.4<br>21.7--38.1 | 17.2--49.3<br>18.9--42.8 |
| 37 years | 19.8--26.9<br>22.2--30.6 | 18.1--30.1<br>19.8--32.6 | 15.3--36.9<br>18.7--36.7 | 23.0--32.6<br>22.3--30.7 | 20.8--36.3<br>19.0--35.0 | 17.1--49.1<br>17.0--38.5 |
| 38 years | 19.5--26.9<br>22.3--27.4 | 17.9--29.9<br>19.7--31.0 | 15.2--36.7<br>18.2--35.7 | 22.9--32.4<br>21.8--30.0 | 20.7--36.2<br>19.0--33.1 | 17.0--48.8<br>17.0--37.2 |

|          |                          |                          |                          |                          |                          |                          |
|----------|--------------------------|--------------------------|--------------------------|--------------------------|--------------------------|--------------------------|
| 39 years | 19.3--26.8<br>19.8--26.5 | 17.8--29.7<br>18.8--30.3 | 15.1--36.6<br>16.3--35.6 | 22.8--32.2<br>22.4--31.1 | 20.6--36.2<br>18.8--33.4 | 16.9--48.5<br>17.8--37.9 |
| 40 years | 19.1--26.7<br>19.1--26.4 | 17.7--29.6<br>18.2--30.1 | 15.0--36.4<br>13.6--36.5 | 22.7--32.1<br>22.3--29.3 | 20.5--36.1<br>19.1--32.8 | 16.9--48.1<br>17.8--38.8 |
| 41 years | 18.9--26.6<br>18.7--26.0 | 17.5--29.4<br>17.9--29.3 | 14.9--36.3<br>13.8--35.6 | 22.6--31.9<br>23.2--29.7 | 20.4--36.1<br>19.7--37.6 | 16.8--47.7<br>18.9--48.1 |
| 42 years | 18.7--26.6<br>19.3--27.0 | 17.4--29.2<br>18.1--29.3 | 14.7--36.1<br>15.2--32.8 | 22.5--31.8<br>23.2--31.6 | 20.2--36.1<br>19.8--37.5 | 16.7--47.3<br>18.0--48.0 |
| 43 years | 18.5--26.5<br>20.6--26.3 | 17.2--29.0<br>18.5--29.5 | 14.6--35.9<br>14.9--32.7 | 22.5--31.6<br>23.4--31.4 | 20.1--36.1<br>19.6--35.2 | 16.6--46.9<br>18.8--46.8 |
| 44 years | 18.4--26.4<br>19.2--24.9 | 17.0--28.8<br>17.0--25.5 | 14.4--35.8<br>14.0--30.2 | 22.4--31.5<br>20.3--30.0 | 20.0--36.1<br>19.2--32.8 | 16.5--46.4<br>17.1--42.3 |
| 45 years | 18.2--26.3<br>17.2--24.1 | 16.9--28.6<br>16.2--26.3 | 14.3--35.6<br>14.1--39.6 | 22.4--31.4<br>21.0--28.3 | 19.9--36.1<br>19.1--33.8 | 16.5--46.1<br>16.4--38.7 |
| 46 years | 18.1--26.2<br>17.6--25.4 | 16.7--28.4<br>15.8--28.3 | 14.1--35.5<br>14.9--34.8 | 22.3--31.3<br>22.5--32.3 | 19.8--36.0<br>21.6--37.6 | 16.4--45.7<br>17.2--44.5 |
| 47 years | 18.0--26.0<br>19.0--26.9 | 16.5--28.2<br>16.8--28.2 | 13.9--35.4<br>15.1--42.0 | 22.2--31.2<br>22.0--31.7 | 19.7--36.0<br>19.5--35.4 | 16.3--45.4<br>16.7--44.4 |
| 48 years | 17.8--25.9<br>18.7--25.0 | 16.3--28.0<br>17.3--27.6 | 13.7--35.2<br>14.7--41.8 | 22.2--31.1<br>21.2--30.2 | 19.6--35.9<br>18.5--35.5 | 16.2--45.1<br>16.5--42.5 |
| 49 years | 17.7--25.8<br>17.9--23.2 | 16.2--27.8<br>16.5--25.4 | 13.5--35.1<br>14.0--30.6 | 22.1--30.9<br>21.2--32.1 | 19.5--35.9<br>18.4--34.3 | 16.2--44.9<br>15.6--44.8 |
| 50 years | 17.6--25.7<br>18.0--24.6 | 16.0--27.6<br>16.6--26.9 | 13.4--35.0<br>13.7--37.5 | 22.0--30.8<br>21.2--28.2 | 19.4--35.8<br>17.7--32.6 | 16.1--44.7<br>15.7--42.2 |
| 51 years | 17.4--25.5<br>18.2--25.5 | 15.8--27.4<br>16.6--32.3 | 13.2--34.9<br>14.6--38.1 | 21.9--30.7<br>22.5--28.6 | 19.3--35.7<br>18.3--31.9 | 16.0--44.6<br>15.4--38.6 |
| 52 years | 17.3--25.4<br>18.4--25.7 | 15.7--27.2<br>17.0--27.3 | 13.0--34.8<br>14.7--36.6 | 21.8--30.6<br>20.5--30.4 | 19.2--35.6<br>17.9--35.4 | 15.9--44.5<br>13.9--43.4 |
| 53 years | 17.2--25.2<br>18.9--24.8 | 15.5--27.1<br>17.3--26.4 | 12.9--34.8<br>14.8--31.5 | 21.7--30.5<br>20.0--34.1 | 19.1--35.5<br>18.4--43.6 | 15.9--44.5<br>15.0--52.7 |
| 54 years | 17.1--25.0<br>17.6--26.8 | 15.4--26.9<br>15.6--29.8 | 12.7--34.7<br>12.8--35.0 | 21.6--30.4<br>20.9--32.2 | 19.0--35.4<br>19.4--39.9 | 15.8--44.4<br>16.4--53.9 |
| 55 years | 17.0--24.9<br>17.0--26.7 | 15.2--26.8<br>15.4--30.3 | 12.6--34.7<br>12.5--36.3 | 21.5--30.3<br>22.1--30.6 | 18.9--35.3<br>20.2--34.4 | 15.7--44.5<br>16.8--39.4 |
| 56 years | 16.9--24.7<br>16.2--23.5 | 15.1--26.7<br>14.0--26.7 | 12.5--34.7<br>13.1--32.7 | 21.4--30.2<br>23.3--32.0 | 18.7--35.1<br>20.5--34.2 | 15.6--44.6<br>17.7--39.0 |
| 57 years | 16.8--24.5<br>16.0--24.8 | 14.9--26.6<br>13.8--28.8 | 12.3--34.7<br>12.7--33.4 | 21.3--30.1<br>26.3--33.3 | 18.6--35.0<br>22.5--37.9 | 15.6--44.7<br>17.5--41.4 |
| 58 years | 16.7--24.3<br>16.3--25.3 | 14.8--26.5<br>13.1--26.9 | 12.2--34.7<br>12.5--32.3 | 21.2--30.0<br>23.9--32.6 | 18.5--34.8<br>20.7--38.7 | 15.5--44.8<br>18.0--45.2 |
| 59 years | 16.6--24.1<br>17.9--25.5 | 14.7--26.4<br>14.1--27.5 | 12.1--34.7<br>10.2--32.3 | 21.1--29.9<br>20.6--32.3 | 18.4--34.6<br>19.3--35.2 | 15.4--45.0<br>17.3--47.0 |
| 60 years | 16.5--23.9<br>18.3--26.8 | 14.6--26.3<br>16.1--28.4 | 12.0--34.8<br>10.5--32.6 | 21.0--29.8<br>21.8--31.9 | 18.3--34.4<br>19.6--34.4 | 15.4--45.3<br>17.3--47.3 |
| 61 years | 16.4--23.7<br>17.8--24.7 | 14.4--26.2<br>15.5--26.9 | 11.9--34.8<br>13.3--30.9 | 20.8--29.8<br>22.2--30.8 | 18.2--34.2<br>20.9--32.9 | 15.3--45.6<br>15.4--45.1 |
| 62 years | 16.3--23.4<br>17.0--21.6 | 14.3--26.2<br>15.0--23.8 | 11.8--34.9<br>13.0--29.5 | 20.7--29.7<br>21.8--30.1 | 18.1--34.0<br>19.0--32.1 | 15.2--45.9<br>15.1--43.1 |
| 63 years | 16.2--23.2<br>16.2--21.7 | 14.2--26.1<br>14.8--24.6 | 11.7--35.0<br>12.2--30.2 | 20.6--29.6<br>19.6--28.1 | 18.0--33.8<br>17.9--31.3 | 15.1--46.1<br>16.8--42.6 |

|            |                          |                          |                          |                          |                          |                          |
|------------|--------------------------|--------------------------|--------------------------|--------------------------|--------------------------|--------------------------|
| 64 years   | 16.1--23.0<br>16.2--23.2 | 14.1--26.1<br>13.8--26.0 | 11.6--35.1<br>12.2--29.4 | 20.4--29.5<br>17.8--25.2 | 17.9--33.5<br>14.6--28.5 | 15.1--46.1<br>12.6--41.6 |
| 65 years   | 16.0--22.7<br>16.2--22.2 | 14.0--26.1<br>14.0--24.7 | 11.5--35.2<br>12.3--27.7 | 20.3--29.3<br>18.0--25.6 | 17.8--33.3<br>13.3--30.8 | 15.0--46.1<br>12.3--43.5 |
| 66 years   | 15.9--22.5<br>15.1--20.2 | 13.9--26.1<br>14.3--23.4 | 11.5--35.3<br>11.6--26.4 | 20.2--29.2<br>20.4--30.0 | 17.7--33.0<br>18.4--32.6 | 14.9--45.9<br>13.1--46.3 |
| 67 years   | 15.8--22.2<br>16.1--21.3 | 13.9--26.1<br>14.6--24.1 | 11.4--35.5<br>10.0--34.6 | 20.0--29.0<br>20.3--32.2 | 17.5--32.7<br>17.7--35.7 | 14.9--45.6<br>15.6--47.4 |
| 68 years   | 15.7--21.9<br>14.1--21.6 | 13.8--26.1<br>11.4--24.3 | 11.4--35.6<br>10.0--30.4 | 19.9--28.8<br>19.3--31.1 | 17.4--32.4<br>17.2--34.5 | 14.8--45.1<br>15.0--47.8 |
| 69 years   | 15.6--21.6<br>14.1--20.0 | 13.7--26.1<br>11.4--22.3 | 11.3--35.8<br>9.8--26.5  | 19.7--28.6<br>19.9--28.3 | 17.3--32.1<br>17.6--31.0 | 14.7--44.5<br>14.6--35.1 |
| 70 years   | 15.6--21.2<br>14.8--20.3 | 13.6--26.2<br>12.3--22.2 | 11.3--36.0<br>10.8--37.1 | 19.5--28.4<br>19.2--26.7 | 17.2--31.8<br>17.3--29.7 | 14.7--43.8<br>14.8--44.7 |
| 71 years   | 15.5--20.9<br>17.0--21.2 | 13.6--26.2<br>14.5--26.3 | 11.2--36.2<br>12.1--44.3 | 19.4--28.2<br>20.7--27.9 | 17.1--31.5<br>19.0--31.9 | 14.6--42.9<br>16.2--44.3 |
| 72 years   | 15.4--20.7<br>17.1--22.6 | 13.5--26.3<br>14.8--25.4 | 11.2--36.4<br>12.6--35.9 | 19.2--27.9<br>21.1--27.5 | 17.0--31.1<br>19.8--31.1 | 14.5--42.0<br>17.4--34.8 |
| 73 years   | 15.3--20.8<br>14.6--22.7 | 13.4--26.4<br>13.0--25.4 | 11.2--36.6<br>11.5--27.9 | 19.0--27.7<br>21.0--24.9 | 16.9--30.8<br>16.9--28.6 | 14.5--40.9<br>15.4--33.1 |
| 74 years   | 15.3--21.1<br>14.6--21.1 | 13.4--26.4<br>12.8--25.0 | 11.2--36.9<br>12.1--35.6 | 18.9--27.4<br>20.4--27.4 | 16.8--30.4<br>19.0--30.1 | 14.4--39.6<br>16.2--35.0 |
| 75 years   | 15.2--21.7<br>15.3--20.5 | 13.4--26.5<br>14.0--21.1 | 11.1--37.1<br>12.8--33.1 | 18.7--27.1<br>18.6--29.5 | 16.7--30.0<br>16.6--32.4 | 14.4--38.2<br>14.0--38.6 |
| 76 years   | 15.1--22.5<br>16.3--20.5 | 13.3--26.6<br>14.5--24.3 | 11.1--37.4<br>14.0--34.8 | 18.5--26.8<br>16.2--22.6 | 16.5--29.7<br>15.7--29.7 | 14.3--36.7<br>13.9--37.1 |
| 77 years   | 15.1--23.2<br>19.5--28.1 | 13.3--26.8<br>18.8--30.6 | 11.1--37.7<br>17.1--36.5 | 18.3--26.5<br>17.6--23.1 | 16.4--29.3<br>16.2--25.1 | 14.2--35.1<br>16.2--27.8 |
| 78 years   | 15.0--23.9<br>13.9--19.5 | 13.2--26.9<br>12.8--27.0 | 11.1--38.0<br>10.5--28.1 | 18.1--26.1<br>20.8--24.6 | 16.3--28.8<br>19.5--26.5 | 14.2--33.3<br>18.4--28.1 |
| 79 years   | 15.0--24.5<br>13.8--25.7 | 13.2--27.0<br>12.6--29.6 | 11.2--38.3<br>10.4--47.5 | 17.9--25.8<br>19.1--20.2 | 16.2--28.4<br>18.9--20.5 | 14.1--31.4<br>18.6--20.7 |
| ≥ 80 years | N/A                      | N/A                      | N/A                      | N/A                      | N/A                      | N/A                      |

Table S14. Age norm lookup table for spindle amplitude ( $\mu\text{V}$ ) during N2 at frontal channel. In each cell, the first row is from smoothed value, the second row is from unsmoothed value (actual data). < 13 years and > 80 years are not applicable since they are not present in the dataset.

| Age        | Male 50% range           | Male 75% range           | Male 95% range           | Female 50% range         | Female 75% range         | Female 95% range         |
|------------|--------------------------|--------------------------|--------------------------|--------------------------|--------------------------|--------------------------|
| < 13 years | N/A                      | N/A                      | N/A                      | N/A                      | N/A                      | N/A                      |
| 13 years   | 27.0--41.1<br>22.0--50.1 | 24.9--49.2<br>21.0--51.8 | 20.7--60.2<br>20.2--53.1 | 28.1--41.6<br>37.2--39.5 | 25.3--45.4<br>34.9--40.0 | 21.5--57.9<br>33.1--40.4 |
| 14 years   | 26.9--40.9<br>36.2--43.6 | 24.6--48.8<br>32.2--46.0 | 20.5--60.1<br>27.8--48.1 | 28.1--41.6<br>32.8--41.3 | 25.3--45.3<br>30.7--43.5 | 21.5--57.9<br>29.0--45.2 |
| 15 years   | 26.8--40.5<br>35.6--48.5 | 24.4--48.0<br>27.3--55.1 | 20.4--59.3<br>23.0--62.0 | 28.0--41.5<br>28.3--44.6 | 25.2--45.1<br>26.2--45.5 | 21.5--58.1<br>25.6--54.2 |
| 16 years   | 26.7--40.1<br>34.9--52.0 | 24.1--47.1<br>30.9--59.2 | 20.2--58.3<br>22.7--63.4 | 27.9--41.2<br>28.2--43.6 | 25.0--44.9<br>26.1--45.3 | 21.5--58.5<br>25.6--54.5 |
| 17 years   | 26.5--39.4<br>33.0--39.3 | 23.8--46.0<br>29.9--44.8 | 19.9--57.1<br>26.4--58.3 | 27.8--41.0<br>32.1--41.5 | 24.9--44.9<br>25.4--46.8 | 21.4--58.3<br>23.3--61.3 |
| 18 years   | 26.2--38.6<br>26.9--35.7 | 23.4--45.1<br>25.4--38.1 | 19.6--55.9<br>23.1--39.5 | 27.6--40.6<br>27.1--42.5 | 24.7--44.6<br>22.7--47.5 | 21.3--57.8<br>21.5--59.6 |
| 19 years   | 26.0--37.7<br>27.0--36.1 | 23.1--44.1<br>25.0--37.9 | 19.4--54.5<br>22.9--45.0 | 27.5--40.3<br>28.3--38.9 | 24.5--44.4<br>22.7--47.5 | 21.2--57.3<br>21.5--51.2 |
| 20 years   | 25.8--36.8<br>29.4--36.4 | 22.8--43.1<br>26.4--42.2 | 19.2--53.1<br>24.4--52.1 | 27.4--39.9<br>29.8--37.8 | 24.4--44.2<br>28.6--42.5 | 21.1--56.8<br>21.8--49.2 |
| 21 years   | 25.6--36.1<br>25.9--36.3 | 22.5--42.1<br>24.1--37.6 | 19.0--51.8<br>20.5--49.1 | 27.2--39.6<br>29.2--37.6 | 24.2--44.0<br>24.1--42.1 | 21.0--56.4<br>20.5--45.7 |
| 22 years   | 25.4--35.5<br>23.2--34.1 | 22.2--41.0<br>20.6--40.8 | 18.7--50.3<br>19.4--44.1 | 27.1--39.3<br>25.8--32.7 | 24.1--43.8<br>23.5--40.5 | 21.0--56.1<br>20.3--52.4 |
| 23 years   | 25.2--35.0<br>23.0--30.7 | 21.9--40.0<br>20.6--39.4 | 18.5--48.8<br>19.2--44.3 | 26.9--39.1<br>25.6--36.1 | 24.0--43.7<br>23.5--43.6 | 21.0--56.1<br>20.4--63.3 |
| 24 years   | 25.0--34.4<br>22.1--30.5 | 21.7--39.1<br>18.9--32.5 | 18.3--47.4<br>16.7--36.1 | 26.9--38.9<br>26.1--38.3 | 23.9--43.6<br>23.9--42.6 | 21.0--55.7<br>21.6--57.0 |
| 25 years   | 24.8--33.9<br>22.3--32.3 | 21.5--38.2<br>18.7--34.9 | 18.2--46.1<br>17.0--41.2 | 26.9--38.8<br>28.7--36.7 | 23.9--43.4<br>24.1--42.5 | 21.0--55.0<br>23.6--50.4 |
| 26 years   | 24.6--33.6<br>27.2--33.8 | 21.4--37.7<br>21.7--40.0 | 18.1--44.7<br>18.6--48.5 | 26.9--38.6<br>27.9--36.2 | 23.9--43.3<br>23.7--41.1 | 21.0--54.4<br>21.2--48.7 |
| 27 years   | 24.4--33.4<br>25.2--31.7 | 21.4--37.5<br>21.8--35.8 | 18.1--44.0<br>19.7--44.5 | 26.8--38.6<br>28.5--40.9 | 23.9--43.3<br>23.7--49.2 | 20.9--53.7<br>21.6--53.1 |
| 28 years   | 24.3--33.2<br>22.9--32.5 | 21.4--37.3<br>21.2--37.0 | 18.0--43.6<br>19.8--41.5 | 26.8--38.5<br>28.5--41.0 | 23.9--43.3<br>24.1--49.3 | 20.8--53.3<br>21.7--53.1 |
| 29 years   | 24.1--33.2<br>25.9--35.3 | 21.4--37.1<br>22.5--39.8 | 18.0--43.1<br>20.5--42.5 | 26.7--38.4<br>26.4--37.8 | 23.8--43.1<br>23.7--40.0 | 20.7--53.4<br>21.2--43.4 |
| 30 years   | 24.0--33.0<br>27.9--36.4 | 21.4--36.8<br>26.6--39.4 | 17.9--42.7<br>22.6--42.6 | 26.6--38.2<br>29.2--38.9 | 23.7--43.0<br>24.7--44.3 | 20.5--53.6<br>22.0--51.0 |
| 31 years   | 23.9--32.8<br>25.4--35.4 | 21.3--36.5<br>22.6--39.5 | 17.8--42.4<br>18.8--46.7 | 26.4--37.9<br>28.6--38.8 | 23.5--42.8<br>26.2--43.9 | 20.3--54.0<br>23.9--51.0 |
| 32 years   | 23.7--32.5<br>24.6--31.7 | 21.2--36.2<br>21.1--35.1 | 17.7--42.2<br>18.5--41.5 | 26.3--37.5<br>26.1--38.2 | 23.3--42.6<br>24.3--40.1 | 20.0--54.1<br>19.9--57.2 |
| 33 years   | 23.4--32.3<br>24.4--30.7 | 21.2--35.9<br>21.0--34.5 | 17.7--42.0<br>17.8--36.6 | 26.1--37.1<br>25.9--38.4 | 23.1--42.5<br>24.6--43.3 | 19.7--54.3<br>19.5--57.6 |
| 34 years   | 23.2--32.2               | 21.1--35.6               | 17.6--42.0               | 25.9--36.8               | 22.9--42.4               | 19.4--54.5               |

|          |                          |                          |                          |                          |                          |                          |
|----------|--------------------------|--------------------------|--------------------------|--------------------------|--------------------------|--------------------------|
|          | 22.6--30.7               | 20.0--34.4               | 17.2--36.6               | 25.4--37.3               | 22.7--41.9               | 21.2--54.1               |
| 35 years | 23.1--32.0<br>21.9--29.7 | 21.0--35.4<br>21.3--31.5 | 17.5--42.0<br>18.7--36.0 | 25.6--36.4<br>25.4--32.8 | 22.6--42.1<br>21.8--39.3 | 19.1--54.5<br>21.1--54.6 |
| 36 years | 22.9--31.9<br>21.6--29.4 | 20.9--35.2<br>19.3--31.0 | 17.4--42.0<br>17.9--40.1 | 25.4--35.9<br>26.9--34.3 | 22.3--41.7<br>22.4--42.1 | 18.8--54.6<br>20.0--46.2 |
| 37 years | 22.7--31.8<br>21.4--30.9 | 20.8--35.0<br>18.7--36.2 | 17.3--42.0<br>17.2--39.7 | 25.2--35.5<br>26.8--36.8 | 22.1--41.5<br>22.6--41.6 | 18.5--54.9<br>20.1--45.2 |
| 38 years | 22.5--31.7<br>26.7--36.2 | 20.7--34.9<br>22.8--38.8 | 17.2--41.8<br>17.2--53.0 | 25.0--35.0<br>25.2--36.0 | 21.8--41.2<br>21.9--40.7 | 18.3--55.0<br>18.8--49.4 |
| 39 years | 22.4--31.5<br>25.5--32.8 | 20.5--34.6<br>22.4--35.5 | 17.1--41.7<br>20.2--44.3 | 24.7--34.7<br>24.1--32.4 | 21.5--41.1<br>21.4--38.3 | 18.0--55.1<br>16.7--71.6 |
| 40 years | 22.2--31.3<br>24.4--31.3 | 20.4--34.4<br>21.3--34.2 | 17.0--41.4<br>18.4--38.6 | 24.4--34.3<br>24.0--32.3 | 21.3--40.9<br>20.7--38.1 | 17.8--55.0<br>17.1--49.9 |
| 41 years | 22.0--31.1<br>22.5--31.8 | 20.3--34.2<br>20.2--33.5 | 16.9--41.3<br>17.5--43.1 | 24.2--34.0<br>23.8--32.6 | 21.1--40.8<br>20.1--37.3 | 17.6--54.8<br>17.4--44.6 |
| 42 years | 21.9--30.9<br>21.3--31.9 | 20.2--34.1<br>19.9--34.0 | 16.8--41.1<br>15.5--38.0 | 24.0--33.8<br>24.3--32.7 | 20.9--40.7<br>20.9--38.5 | 17.5--54.5<br>17.0--54.8 |
| 43 years | 21.7--30.8<br>22.4--33.2 | 20.2--33.9<br>20.9--35.2 | 16.7--41.0<br>15.4--39.6 | 23.8--33.6<br>24.4--35.2 | 20.8--40.7<br>20.7--46.0 | 17.5--54.1<br>18.4--57.3 |
| 44 years | 21.6--30.5<br>22.5--31.9 | 20.1--33.7<br>20.4--34.5 | 16.7--40.9<br>19.4--39.6 | 23.6--33.5<br>25.1--36.0 | 20.7--40.7<br>20.5--45.8 | 17.4--54.0<br>19.0--56.4 |
| 45 years | 21.5--30.3<br>20.8--28.5 | 20.0--33.6<br>19.9--31.5 | 16.6--40.7<br>13.7--34.6 | 23.5--33.5<br>22.8--29.2 | 20.6--40.7<br>21.1--35.9 | 17.4--53.9<br>17.7--43.3 |
| 46 years | 21.4--30.1<br>20.6--28.3 | 19.9--33.4<br>18.8--30.3 | 16.5--40.4<br>13.6--39.0 | 23.4--33.6<br>23.0--29.9 | 20.6--40.6<br>21.7--34.9 | 17.3--53.8<br>18.1--42.0 |
| 47 years | 21.3--29.9<br>20.8--28.6 | 19.9--33.2<br>19.8--31.2 | 16.5--40.2<br>17.2--38.8 | 23.3--33.6<br>23.9--34.1 | 20.5--40.6<br>22.3--41.2 | 17.3--53.6<br>20.2--55.8 |
| 48 years | 21.1--29.6<br>21.0--30.5 | 19.7--33.0<br>20.0--32.3 | 16.4--40.0<br>17.5--38.9 | 23.2--33.8<br>22.6--34.5 | 20.5--40.8<br>20.5--40.7 | 17.2--53.5<br>17.6--55.1 |
| 49 years | 21.0--29.4<br>21.3--30.5 | 19.6--32.8<br>20.0--32.3 | 16.3--39.8<br>17.1--38.4 | 23.1--34.0<br>22.5--33.6 | 20.5--40.8<br>20.4--41.0 | 17.2--53.2<br>17.2--49.0 |
| 50 years | 20.9--29.1<br>20.4--28.2 | 19.5--32.7<br>18.9--32.1 | 16.1--39.8<br>16.3--39.1 | 23.2--34.2<br>22.4--33.8 | 20.5--40.9<br>19.8--42.8 | 17.2--53.0<br>16.7--51.5 |
| 51 years | 20.8--29.0<br>20.7--29.0 | 19.4--32.6<br>19.5--33.1 | 15.9--39.9<br>16.6--40.6 | 23.1--34.4<br>22.9--31.9 | 20.6--41.0<br>19.4--38.5 | 17.1--52.9<br>17.3--45.5 |
| 52 years | 20.7--28.9<br>20.9--29.0 | 19.2--32.4<br>20.3--34.2 | 15.7--39.8<br>18.2--48.6 | 23.2--34.6<br>26.0--31.8 | 20.6--41.0<br>21.5--36.2 | 17.1--52.9<br>17.5--45.1 |
| 53 years | 20.6--28.8<br>22.0--28.7 | 19.0--32.3<br>20.3--32.8 | 15.5--39.8<br>19.4--39.7 | 23.3--34.8<br>22.1--35.2 | 20.7--41.1<br>18.2--41.6 | 17.1--53.0<br>16.5--50.7 |
| 54 years | 20.5--28.6<br>21.4--28.3 | 18.7--32.1<br>20.1--30.6 | 15.2--39.8<br>17.2--36.0 | 23.4--34.9<br>21.9--38.8 | 20.8--40.9<br>19.2--43.8 | 17.0--52.9<br>17.1--56.0 |
| 55 years | 20.3--28.5<br>21.1--30.6 | 18.4--32.0<br>19.5--33.2 | 15.0--39.9<br>15.3--38.1 | 23.4--35.1<br>22.8--35.4 | 20.8--40.8<br>20.9--42.5 | 16.8--52.6<br>17.1--60.3 |
| 56 years | 20.2--28.4<br>21.0--28.8 | 18.1--31.8<br>18.5--32.7 | 14.7--39.9<br>15.2--38.2 | 23.4--35.3<br>26.1--35.1 | 20.7--40.6<br>22.1--37.5 | 16.6--52.2<br>17.6--47.6 |
| 57 years | 20.0--28.2<br>19.1--25.0 | 17.8--31.6<br>16.5--27.2 | 14.4--40.5<br>13.8--32.3 | 23.5--35.3<br>26.8--36.0 | 20.7--40.7<br>23.0--37.8 | 16.4--51.8<br>18.2--42.4 |
| 58 years | 19.8--28.1<br>19.1--26.1 | 17.6--31.4<br>15.9--32.3 | 14.1--40.7<br>14.0--49.7 | 23.4--35.3<br>27.8--36.5 | 20.6--40.6<br>22.9--40.6 | 16.3--51.5<br>19.1--48.2 |

|            |                          |                          |                          |                          |                          |                          |
|------------|--------------------------|--------------------------|--------------------------|--------------------------|--------------------------|--------------------------|
| 59 years   | 19.6--28.0<br>20.2--28.5 | 17.3--31.2<br>16.9--32.0 | 13.8--41.3<br>14.7--50.1 | 23.4--35.2<br>24.4--37.0 | 20.5--40.6<br>21.7--44.8 | 16.1--51.2<br>20.1--49.4 |
| 60 years   | 19.4--27.8<br>21.0--28.4 | 17.1--31.0<br>16.2--29.7 | 13.5--42.0<br>13.1--34.8 | 23.4--35.0<br>23.9--36.3 | 20.3--40.3<br>20.6--39.0 | 15.9--51.0<br>17.4--45.5 |
| 61 years   | 19.1--27.5<br>19.6--29.7 | 16.8--30.7<br>17.5--33.6 | 13.3--42.8<br>13.1--36.6 | 23.3--34.8<br>24.2--35.2 | 20.2--40.1<br>19.9--42.0 | 15.7--50.8<br>17.4--47.4 |
| 62 years   | 18.9--27.2<br>19.6--29.5 | 16.6--30.5<br>17.9--30.9 | 13.1--43.7<br>16.0--37.6 | 23.2--34.6<br>24.9--34.9 | 20.0--39.8<br>22.6--42.3 | 15.5--50.4<br>17.1--48.1 |
| 63 years   | 18.7--26.9<br>19.8--26.9 | 16.5--30.3<br>17.7--29.0 | 12.9--44.9<br>15.6--38.9 | 23.0--34.3<br>23.9--34.3 | 19.8--39.5<br>22.4--42.8 | 15.3--50.0<br>16.4--63.3 |
| 64 years   | 18.5--26.6<br>18.4--25.4 | 16.3--30.3<br>16.7--27.6 | 12.8--46.5<br>12.9--32.2 | 22.8--34.1<br>22.4--31.5 | 19.5--39.1<br>19.5--36.9 | 15.1--49.5<br>16.2--56.9 |
| 65 years   | 18.2--26.3<br>17.7--26.0 | 16.3--30.2<br>14.8--29.3 | 12.6--48.4<br>12.9--33.8 | 22.6--33.8<br>19.4--30.1 | 19.3--38.7<br>16.0--35.0 | 15.1--48.9<br>14.2--46.6 |
| 66 years   | 18.0--26.1<br>18.0--26.6 | 16.2--30.2<br>16.9--27.9 | 12.5--50.4<br>14.7--34.7 | 22.5--33.6<br>19.5--30.8 | 19.1--38.6<br>15.2--35.7 | 15.1--48.6<br>14.2--47.5 |
| 67 years   | 17.9--25.8<br>17.1--24.9 | 16.2--30.3<br>16.2--27.3 | 12.4--52.0<br>12.1--53.7 | 22.3--33.1<br>22.6--33.4 | 19.0--38.3<br>19.3--41.2 | 15.2--48.2<br>14.9--47.5 |
| 68 years   | 17.8--25.6<br>17.1--24.8 | 16.2--30.5<br>15.8--30.4 | 12.4--53.7<br>12.0--54.4 | 22.1--32.7<br>24.5--35.6 | 18.9--37.9<br>19.8--43.4 | 15.4--47.7<br>17.5--55.8 |
| 69 years   | 17.7--25.5<br>17.3--23.4 | 16.3--30.7<br>15.8--30.0 | 12.4--54.6<br>11.9--50.8 | 21.9--32.3<br>22.3--31.9 | 18.8--37.3<br>20.1--39.2 | 15.5--47.0<br>17.0--48.8 |
| 70 years   | 17.6--25.4<br>17.2--22.4 | 16.3--31.1<br>15.8--24.9 | 12.6--56.2<br>10.7--53.8 | 21.7--32.0<br>22.0--29.4 | 18.8--36.8<br>19.7--33.0 | 15.6--46.2<br>16.3--40.2 |
| 71 years   | 17.6--25.3<br>17.0--22.9 | 16.4--31.4<br>15.7--26.6 | 12.8--56.6<br>12.0--69.3 | 21.5--31.6<br>21.9--30.6 | 18.8--36.2<br>18.4--35.4 | 15.8--45.4<br>16.6--43.6 |
| 72 years   | 17.6--25.4<br>18.3--25.2 | 16.4--31.6<br>16.4--36.7 | 12.9--57.0<br>14.0--69.5 | 21.3--31.2<br>22.0--32.8 | 18.7--35.7<br>20.1--35.5 | 15.8--44.7<br>18.3--43.5 |
| 73 years   | 17.5--25.4<br>20.4--30.3 | 16.5--31.8<br>19.2--34.3 | 13.1--56.7<br>15.5--73.1 | 21.1--30.6<br>22.1--32.8 | 18.6--35.0<br>20.2--33.9 | 15.8--43.9<br>19.0--39.2 |
| 74 years   | 17.5--25.4<br>19.4--27.6 | 16.6--32.0<br>16.9--31.7 | 13.3--56.5<br>15.5--74.2 | 20.9--30.2<br>22.8--27.5 | 18.5--34.5<br>18.7--30.1 | 15.7--43.2<br>17.5--37.8 |
| 75 years   | 17.6--25.5<br>16.9--21.7 | 16.6--32.0<br>16.5--24.1 | 13.5--55.4<br>15.3--47.6 | 20.7--29.6<br>22.0--27.3 | 18.3--33.9<br>18.9--33.4 | 15.7--42.4<br>17.7--39.2 |
| 76 years   | 17.6--25.7<br>17.1--22.7 | 16.7--32.1<br>16.9--24.1 | 13.6--54.1<br>16.3--41.8 | 20.6--29.0<br>19.6--28.7 | 18.3--33.5<br>18.1--31.0 | 15.6--41.6<br>15.5--38.6 |
| 77 years   | 17.6--25.8<br>18.7--24.7 | 16.7--32.1<br>18.2--26.4 | 13.6--52.5<br>17.2--31.0 | 20.5--28.5<br>19.6--24.1 | 18.1--33.1<br>16.9--26.9 | 15.4--40.9<br>15.4--29.5 |
| 78 years   | 17.7--25.6<br>23.0--30.0 | 16.6--31.9<br>20.2--33.2 | 13.7--50.9<br>19.3--34.8 | 20.4--27.9<br>20.9--25.6 | 17.8--32.4<br>19.3--29.9 | 15.2--40.2<br>18.0--33.8 |
| 79 years   | 17.7--25.5<br>18.0--27.2 | 16.5--31.5<br>16.9--34.2 | 13.9--49.0<br>12.4--45.5 | 20.3--27.4<br>24.4--29.2 | 17.7--31.9<br>22.9--32.0 | 14.9--39.7<br>21.7--34.2 |
| 80 years   | 17.7--25.3<br>17.6--23.2 | 16.4--30.9<br>15.2--27.1 | 14.0--46.5<br>13.1--43.5 | 20.1--26.9<br>20.5--25.4 | 17.5--31.5<br>16.5--29.0 | 14.7--39.4<br>13.7--38.1 |
| > 80 years | N/A                      | N/A                      | N/A                      | N/A                      | N/A                      | N/A                      |

1 **Supplementary Method**

2

3 The model of the smooth age-dependent spectrogram is defined as

4 
$$S_{i,g,f,c,s,j} = F(\theta, a_i, g, f, c, s) + \epsilon ,$$

5 where  $i \in [1, N]$  is the index of subject;  $g \in \{M, F\}$  is the gender;  $f \in [f_{min}, f_{max}]$  is the index of  
6 frequency;  $c \in [1, C]$  is the index of EEG channel;  $s \in \{W, R, N1, N2, N3\}$  is the sleep stage;  $j \in$   
7  $[1, N_{epoch}]$  is the index of 30-second epoch;  $S_{i,g,f,c,s,j}$  is the observed power spectral density in decibel  
8 unit; and  $\epsilon$  is the noise following normal distribution

9 
$$\epsilon \sim \mathcal{N}(\mu = 0, \sigma^2 = G(\theta', a_i, g, f, c, s)) .$$

10 Here we have parametrized the mean of the age-dependent spectrogram as  $F(\theta, a_i, g, f, c, s) \in \mathbb{R}$  and  
11 variance of the age-dependent spectrogram as  $G(\theta', a_i, g, f, c, s) \in \mathbb{R}^+$ .

12 Our goal is to learn the parameters,  $\theta$  and  $\theta'$  in  $F$  and  $G$  respectively via maximum likelihood estimation.  
13 The likelihood is defined as

14 
$$L(\theta, \theta') = p(S_{i,g,f,c,s,j} | \theta, \theta') = \text{PDF}_{\text{normal}}(F(\theta, a_i, g, f, c, s), G(\theta', a_i, g, f, c, s)) ,$$

15 where  $\text{PDF}_{\text{normal}}$  is the probability density function of normal distribution.

16 The loss function to be optimized,  $J$ , is defined as the negative log-likelihood. We have a separate loss  
17 function for each gender  $g$ , frequency  $f$ , channel  $c$ , and sleep stage  $s$ :

$$\theta^*, \theta'^* = \arg \min_{\theta, \theta'} J_{g,f,c,s}(\theta, \theta')$$

$$\text{subject to } G_{g,f,c,s}(\theta', a_i) > 0.$$

18

19 where

$$\begin{aligned} J_{g,f,c,s}(\theta, \theta') &= - \sum_{i=1}^N \sum_{j \in \{s_i\}} \log p(S_{i,g,f,c,s,j} | \theta, \theta') \\ &= \sum_{i=1}^N \sum_{j \in \{s_i\}} \frac{1}{2} \log G_{g,f,c,s}(\theta', a_i) + \frac{(S_{i,g,f,c,s,j} - F_{g,f,c,s}(\theta, a_i))^2}{2G_{g,f,c,s}(\theta', a_i)} . \end{aligned}$$

20

21 The spectra at any age,  $a$ , from 11 days to 80 years old, is computed as  $F_{g,f,c,s}(\theta^*, a)$ .

22 Here we choose neural network as the parametric form of  $F$  and  $G$  (Figure S8). The neural network  
23 receives a series of polynomial terms of the input age,  $a$  and outputs  $F_{g,f,c,s}(\theta^*, a)$ , i.e. the power  
24 spectral density at gender  $g$ , frequency  $f$ , channel  $c$ , stage  $s$  in decibel unit.

25 Here the power spectral density  $S_{i,g,f,c,s,j}$  is estimated using multitaper power spectral density estimation,  
26 which is a non-parametric Fourier-based method. We chose the multitaper method because it optimally  
27 trades off bias and variance in the spectral estimation. In fact, the multitaper method has similar principle  
28 compared with the Welch method where the Welch method uses overlapped windows as the taper  
29 function, while the multitaper method uses orthogonal Slepian tapers which leads to smaller spectral  
30 leakage and smaller errors on the power estimation.

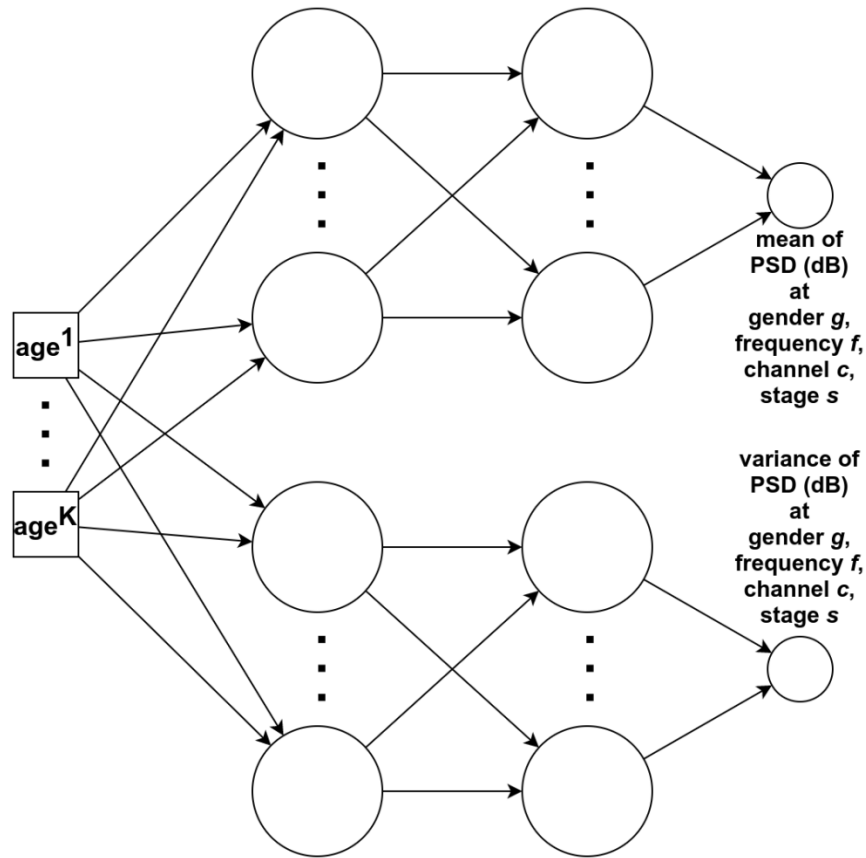

31

32 Figure S8. The neural network model that jointly estimates mean and variance of power spectral density  
 33 (PSD) in decibel unit at frequency  $f$ , channel  $c$ , and stage  $s$ . The input (squares at left) is a polynomial  
 34 series of age up to the  $K$ -th order ( $K$  decided by cross-validation as detailed in the main text). The output  
 35 (smaller circle at right) is the power spectral density as a smooth function of the input age. The  
 36 parameters refer to the weights of all connections.
